# Supplementary material for: Return to work following unintentional injury: a prospective follow-up study
Source: PubMed Central journal article supplement — BMJ Open. 2013 Dec 7;3(12):e003635. doi: 10.1136/bmjopen-2013-003635 (PMC3863117; doi:10.1136/bmjopen-2013-003635), 2013-12-07
Supplement: bmjopen-2013-003635.draft_revisions.pdf [file bmjopen-2013-003635.draft_revisions.pdf]

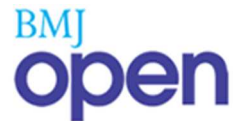

**Return to work following accidental injury: a prospective follow-up study**

|                                 |                                                                                                                                                                                                                                                                                                                                                                      |
|---------------------------------|----------------------------------------------------------------------------------------------------------------------------------------------------------------------------------------------------------------------------------------------------------------------------------------------------------------------------------------------------------------------|
| Journal:                        | <i>BMJ Open</i>                                                                                                                                                                                                                                                                                                                                                      |
| Manuscript ID:                  | bmjopen-2013-003635                                                                                                                                                                                                                                                                                                                                                  |
| Article Type:                   | Research                                                                                                                                                                                                                                                                                                                                                             |
| Date Submitted by the Author:   | 22-Jul-2013                                                                                                                                                                                                                                                                                                                                                          |
| Complete List of Authors:       | Hepp, Urs; Psychiatric Services Aargau AG, Schnyder, Ulrich; University Hospital Zurich, Department of Psychiatry and Psychotherapy<br>Hepp-Beg, Sofia; Private Practice, Friedrich-Perez, Josefina; Hospital Männedorf, Stulz, Niklaus; Psychiatric Services Aargau AG, Moergeli, Hanspeter; University Hospital Zurich, Department of Psychiatry and Psychotherapy |
| <b>Primary Subject Heading</b>: | Mental health                                                                                                                                                                                                                                                                                                                                                        |
| Secondary Subject Heading:      | Emergency medicine                                                                                                                                                                                                                                                                                                                                                   |
| Keywords:                       | MENTAL HEALTH, Adult surgery < SURGERY, OCCUPATIONAL & INDUSTRIAL MEDICINE, PSYCHIATRY, REHABILITATION MEDICINE                                                                                                                                                                                                                                                      |
|                                 |                                                                                                                                                                                                                                                                                                                                                                      |

SCHOLARONE™  
Manuscripts

1  
2  
3  
4  
5  
6  
7  
8 **Return to work following accidental injury: a prospective follow-up study**  
9

10  
11  
12  
13  
14 Urs Hepp, Ulrich Schnyder, Sofia Hepp-Beg, Josefina Friedrich-Perez, Niklaus Stulz,  
15 Hanspeter Moergeli  
16  
17  
18  
19  
20

21  
22 Outpatient Department, Psychiatric Services Aargau (Teaching Hospital of the University of  
23 Zurich), CH-5201 Brugg, Switzerland Urs Hepp head of department  
24 Department of Psychiatry and Psychotherapy, University Hospital Zurich, CH-8091 Zurich,  
25 Switzerland Ulrich Schnyder head of department  
26 Private Practice, CH-8032 Zurich, Switzerland Sofia Hepp-Beg private practitioner  
27 Hospital Männedorf AG, CH-8708 Männedorf, Switzerland Josefina Friedrich-Perez senior  
28 physician  
29 Outpatient Department, Psychiatric Services Aargau (Teaching Hospital of the University of  
30 Zurich), CH-5201 Baden, Switzerland Niklaus Stulz research associate  
31 Department of Psychiatry and Psychotherapy, University Hospital Zurich, CH-8091 Zurich,  
32 Switzerland Hanspeter Moergeli senior researcher  
33  
34  
35  
36  
37  
38  
39  
40  
41  
42  
43

44 Correspondence to: U Hepp [urs.hepp@pdag.ch](mailto:urs.hepp@pdag.ch)  
45  
46  
47  
48

49 Word count: 3637  
50  
51  
52  
53  
54  
55  
56  
57  
58  
59  
60

**Abstract****Objective**

The aim of this study was to predict return to work following accidental injuries leading to hospital admission.

**Design**

Prospective 6 months follow-up study.

**Setting**

Department of trauma surgery of a university hospital.

**Participants**

Consecutively recruited victims of accidental injuries (n=221) hospitalised for a minimum of 32 hours including two consecutive nights. All participants were aged 18-65 years and able to participate in an assessment within 30 days of the accident.

**Main outcome measures**

Interview-assessed number of days off work during the 6 months immediately following the accidental injury.

**Results**

The patients' subjective appraisals of a) accident severity and b) their ability to cope with the resulting injury and its job-related consequences predicted time off work following the accident beyond the impact of the objective severity of their injury and the type of accident involved.

**Conclusions**

Patients' subjective appraisals of the accident severity and of their ability to cope with its consequences are highly relevant for return to work after accidents. Extending findings from previous studies in severely injured and otherwise pre-selected accident victims, this seems to apply to the whole spectrum of patients hospitalised with accidental injuries.

## Introduction

In the EU every year 6.5 million people are admitted to hospitals following accidental (involuntary) injuries.<sup>1</sup> This figure corresponds to more than 1% of the 500 million inhabitants in the EU. In addition to the direct costs of the treatment, accidental injuries cause even higher indirect costs. Sick-leave following accidental injuries is one of the most important contributors to these indirect costs.<sup>2 3</sup> Although return to work is one of the most relevant measures of functional outcome of injuries,<sup>4</sup> few studies on return to work after accidental injuries have been conducted.<sup>2 5-12</sup>

Generally, return to work is not only predicted by injury related or medical factors. Job related factors,<sup>2 11 13 14</sup> socioeconomic factors,<sup>2 6 8 11 15</sup> psychological distress,<sup>8 10 11</sup> causal attribution,<sup>16</sup> and compensation eligibility<sup>9 17</sup> become increasingly important factors for return to work the longer the medical condition lasts. How patients' expectations of recovery affect their health and vocational outcome is insufficiently researched.<sup>18 19</sup> Compared to those remaining on sick-leave, patients returning to work after injury had stronger internal health beliefs, i.e. they believed they had an influence on their own health and considered themselves powerful.<sup>6</sup> In several studies involving various medical conditions, patients' own expectations and predictions of their future work ability predicted return to work.<sup>20-22</sup> There are relatively few studies examining the role of the subjectively experienced accident severity and the subjectively experienced ability to cope with the accidental injury regarding return to work.<sup>6-8</sup>

<sup>12 23</sup> The findings from these studies cannot be generalised as they are compromised by their highly selective samples: the studies were either restricted to severely injured patients without pre-existing mental disorders,<sup>6 7 12 24</sup> and/or they excluded foreign-language patients.<sup>6 7 11 12 17</sup>

<sup>24 25</sup> In a previous study of severely injured accident victims we found that time off work was

1  
2  
3  
4  
5  
6 best predicted by the patients' own appraisals of accident severity and by the patients' own  
7  
8 expectations regarding their ability to cope with the accidental injury and its job-related  
9  
10 consequences.<sup>12</sup> Whereas at the one-year follow-up, injury severity measured by the injury  
11  
12 severity score (ISS)<sup>26</sup> and type of accident (traffic, workplace, sporting/leisure) were also  
13  
14 predictive of time off work,<sup>7</sup> at the three-years follow-up only the self-reported appraisals of  
15  
16 accident severity and the patients' ability to cope with the accidental injury remained  
17  
18 predictive of days absent from the workplace.<sup>12</sup> However, the sample in this previous study  
19  
20 was highly selective. We included only severely injured (ISS $\geq$ 10), German-speaking patients  
21  
22 and excluded patients who had been under treatment for any mental disorders and/or serious  
23  
24 somatic illnesses at the time of the accident. By doing this we may have excluded patients at a  
25  
26 higher risk for sick-leave and the results may therefore not be generalised to apply to all  
27  
28 accident survivors.  
29  
30  
31

32  
33  
34 The aim of this study was to determine whether the predictive value of the patients' own  
35  
36 appraisals of the severity of their accident and of their coping abilities may be replicated in a  
37  
38 larger and less selective sample of patients with any accidental injury requiring hospital  
39  
40 admission.  
41  
42  
43  
44  
45  
46  
47  
48  
49  
50  
51  
52  
53  
54  
55  
56  
57  
58  
59  
60

## Methods

### Sample

Participants were recruited from the Department of Trauma Surgery at the Zurich University Hospital. All the patients qualifying for the study had sustained accidental injuries that required hospitalisation for a minimum of 32 hours including two consecutive nights. Further inclusion criteria were: age between 18 to 65 years; ability to participate in an extensive assessment within 30 days of the accident; and sufficient proficiency in one of the study languages (German, Italian, Spanish, Portuguese, Serbo-Croatian, Turkish, or Albanian) to participate in the interview and to complete the self-report questionnaires. Non-German speaking participants were assessed using interpreters and professionally translated psychometric instruments. Exclusion criteria were: a Glasgow Coma Scale score (GCS)<sup>27</sup> below 9; unconsciousness for more than 15 minutes after the accident; pathological findings in the cranial CT; attempted suicide.

In contrast to our previous study,<sup>7 12</sup> neither serious somatic illness, nor being in treatment for a mental disorder prior to the accident was an exclusion criterion in the present study.<sup>28</sup> With regard to the possibility of generalising the present study's findings, we also retained patients who showed marked clinical signs or symptoms of mental disorders that were obviously unrelated to the accidental injury.

Patients were recruited over a period of 12 months. During this time period 787 patients aged between 18 and 65 years were admitted with accidental injuries. Of these patients 253 did not meet the inclusion criteria due to early discharge (104; 41.1%), poor clinical condition (74; 29.2%), GCS score below 9 (46; 18.2%), insufficient proficiency in one of the study

1  
2  
3  
4  
5  
6 languages (21; 8.3%) or other reasons (29; 11.5%) (multiple reasons possible). As a result,  
7  
8 534 patients fulfilled all criteria and were eligible for the study. Due to a restricted  
9  
10 interviewing capacity, not all the eligible patients could be assessed. A random procedure was  
11  
12 applied to select the patients; this procedure has been described in detail in a previous  
13  
14 publication.<sup>29</sup> The 148 patients who could not be contacted due to our limited interviewing  
15  
16 capacity did not differ from the participating patients with regard to age (mean difference=  
17  
18 0.40 years; 95%-CI=-2.93 to 2.12; t=-0.31; df=481; P=0.754) and gender (Pearson's  $\chi^2=0.77$ ,  
19  
20 df=1, P=0.375). Of the 386 patients who were contacted, 335 gave their written consent to  
21  
22 participate. The 51 (13.2%) who declined participation did not differ significantly from the  
23  
24 participating patients with regard to age (mean difference=3.75 years; 95%-CI=-0.12 to 7.61;  
25  
26 t=-1.91; df=384; P=0.057) and gender (Pearson's  $\chi^2=0.07$ ; df=1; P=0.792).  
27  
28  
29  
30  
31

32 After the exclusion of a small number of victims of physical violence (n=12), the sample  
33  
34 consisted of 323 patients who all attended the interview at T1. On average the T1 interview  
35  
36 was performed 5 days after the referral to the hospital (SD 4.2 days; range: 2 to 28 days). 34  
37  
38 patients had no regular work and were excluded from further analyses regarding time off  
39  
40 work. However, four patients who were receiving unemployment compensation at the time of  
41  
42 the accident were retained for further analyses. For these patients accident-related time off  
43  
44 work was traceable since they needed a doctor's certificate to continue to be eligible for  
45  
46 unemployment compensation. In all, valid data regarding time off work were obtainable from  
47  
48 289 patients.  
49  
50  
51  
52  
53

54 On average the follow-up interview (T2) took place 188 (SD 16.2; range 155 to 257) days  
55  
56 after the accidental injury. 68 (23.5%) dropped out during the follow-up period; these 68  
57  
58  
59  
60

drop-outs did not differ significantly from the final sample with regard to age (mean difference=-2.78 years; 95%-CI=-6.13 to 0.57;  $t=-1.63$ ;  $df=287$ ;  $P=0.104$ ), gender (Pearson's  $\chi^2=3.3$ ;  $df=1$ ;  $P=0.069$ ), type of accident (Pearson's  $\chi^2=6.5$ ;  $df=1$ ;  $P=0.088$ ), clinician-rated Injury Severity Score<sup>26</sup> (mean difference=-0.77; 95%-CI=-3.54 to 1.99;  $t=-0.55$ ;  $df=287$ ;  $P=0.582$ ), and patient-rated subjective accident severity ( $t=1.19$ ;  $df=287$ ;  $P=0.237$ ), appraisal of coping abilities (mean difference=-0.16; 95%-CI=-0.37 to 0.04;  $t=-1.58$ ;  $df=283$ ;  $P=0.115$ ), and intrusions as measured by the Impact of Event Scale<sup>30</sup> (mean difference=0.87; 95%-CI=-1.14 to 2.28;  $t=0.86$ ;  $df=276$ ;  $P=0.393$ ). The final sample consisted of 221 patients.

### Measures

The Injury Severity Score (ISS)<sup>26</sup> and the Glasgow Coma Scale (GCS)<sup>27</sup> were routinely assessed by the surgeons immediately after admission to the emergency room. The ISS permits an evaluation of the severity of injuries by a trauma surgeon: Each part or area of the body affected is given a score (1=minimum to 6=fatal injury). If the score is 6 in one area, the ISS is assigned a sum score of 75. Otherwise, the scores for the three most severely injured areas of the body are squared and then summed, producing a maximum score of 75. Patients with a score of 10 or more are generally considered severely injured. The GCS is an observer-rated scale for the clinical appraisal of the gravity of coma after injury to the skull and brain. Patients with severe traumatic brain injuries generally have a score under 9.

The semi-structured interview at T1 covered socio-demographic data, a detailed work record and information about the accident. Existing pre-accident psychiatric disorders were assessed using the Primary Care Evaluation of Mental Disorders.<sup>31</sup> The patients rated their appraisal of the injury severity on a Likert scale ranging from "1=very slight" to "5=very severe". They



1  
2  
3  
4  
5  
6 also rated their ability to cope with the accidental injury and its job-related consequences on a  
7  
8 Likert scale ranging from “1=very poor” to “5=very good”.<sup>7 12</sup> Posttraumatic psychological  
9  
10 symptoms were assessed by the Impact of Event Scale (IES),<sup>30</sup> a 15 item self-rating  
11  
12 questionnaire comprising two subscales (intrusion and avoidance) with high reliability and  
13  
14 validity.<sup>32</sup> Time off work, assessed at 6 months (T2) post-accident, was defined as the number  
15  
16 of sick-leave days attributable to the accidental injury and its consequences including time of  
17  
18 hospitalisation.  
19

20  
21 A week off work was set to equal seven days of leave. Where subjects who had previously  
22  
23 been full-time employees returned to work on a part-time basis, the days on which they  
24  
25 worked less were added to the total days of leave on a pro rata basis.<sup>12</sup> The interviews were  
26  
27 performed by two medical doctors (SHB and JFP). Each patient was interviewed by the same  
28  
29 interviewer at T1 and T2. Detailed information on the study design and the interrater  
30  
31 reliability is described in an earlier publication.<sup>29</sup>  
32  
33  
34  
35  
36

### 37 **Statistical analysis**

38  
39 Hierarchical linear multiple regression analyses were performed to predict the number of sick-  
40  
41 leave days. They allowed for highlighting the relevance of patient’s appraisal among the  
42  
43 selected potential predictor variables. To enable us to enter the type of accident (road traffic,  
44  
45 workplace, household, or leisure-time accidents) as a predictor into the multiple regression  
46  
47 analysis, this categorical variable was converted into a set of three new variables so that a  
48  
49 deviation contrast resulted. In this way the effect of each accident category was compared to  
50  
51 the mean effect of all accident categories. Since there was one new variable for each degree of  
52  
53 freedom, one accident category (household) had to be omitted in the regression analysis. In the  
54  
55 final regression model including all potential predictors multi-collinearity was low (tolerance  
56  
57  
58  
59  
60

1  
2  
3  
4  
5  
6 >0.75) and the distribution of regression standardised residuals was normal (Kolmogorov-  
7  
8 Smirnov  $Z=0.63$ ,  $P=0.827$ ). Group comparisons of dimensional variables were performed  
9  
10 with t-tests.  
11  
12

### 13 14 Ethical approval

15  
16 Ethical approval was granted by the Ethics Committee of the Canton of Zurich. Written  
17  
18 informed consent was obtained from all participants.  
19  
20  
21  
22  
23  
24  
25  
26  
27  
28  
29  
30  
31  
32  
33  
34  
35  
36  
37  
38  
39  
40  
41  
42  
43  
44  
45  
46  
47  
48  
49  
50  
51  
52  
53  
54  
55  
56  
57  
58  
59  
60

## Results

The socio-demographic characteristics are presented in table 1. 35 (15.8%) of the 221 patients suffered from one or multiple pre-existing mental disorders immediately prior to the accident. Characteristics related to the accidental injury of the 221 patients are found in table 2. The types of accident were as follows: 72 (32.6%) traffic accidents, 66 (29.9%) workplace accidents, 6 (2.7%) household accidents, and 77 (34.8%) sports/leisure activity-related accidents. The mean ISS differed significantly between the types of accident (traffic: M 16.0, SD 12.4; workplace or household: M 11.8, SD 8.2; sporting/leisure activity: M 8.7, SD 7.7; ANOVA:  $F=10.7$ ;  $df=2$ , 218;  $P<0.001$ ).

According to the surgeons' files, 44 (19.9%) patients sustained a mild or moderate traumatic brain injury (MTBI). 41 (18.6%) patients were first referred to the intensive care unit (ICU), with a mean duration of ICU stay of 4.0 days (SD 3.7; range 1-19). The mean length of stay at the acute hospital including the ICU was 15.8 days (SD 16.9; range 2-110). 46 patients had a further stay in a rehabilitation hospital, with a mean length of stay of 35.0 days (SD 25.0; range 3-141). The mean number of sick-leave days was 95.7 (SD 58.1; range 6-183). Patients suffering from pre-existing mental disorders did not differ significantly from the rest of the sample with regard to the number of sick-leave days (mean difference=2.7 days; 95%-CI=-18.4 to 23.8;  $t=0.25$ ;  $df=219$ ;  $P=0.801$ ).

Bivariate correlations of all variables included in the regression analyses are presented in table 3. The objective injury severity (ISS) and the patients' subjective appraisals of the accident severity were positively correlated. Subjective appraisals of the accident severity (but not the objective injury severity scores) were negatively related with self-rated coping abilities.

1  
2  
3  
4  
5  
6 Time off work was significantly correlated with the injury severity (ISS), IES intrusion scores,  
7  
8 and the patients' own appraisals of both their injury severity and their coping abilities. Finally,  
9  
10 time off work was longer after workplace related accidents and shorter after sports/leisure  
11  
12 accidents.

13  
14  
15  
16  
17 In a simultaneous regression analysis the variables injury severity (ISS), sex, age, type of  
18  
19 accident (road traffic, workplace, or leisure-time accidents), and IES intrusion were entered as  
20  
21 potential predictors of time off work. Combined, these predictors explained 24.3% of the  
22  
23 variance of time off work ( $F=9.75$ ;  $df=7, 213$ ;  $P<0.001$ ). When in a series of hierarchical  
24  
25 regressions each of these predictors was examined when added last to this first set, ISS (8.3%,  
26  
27  $F=23.38$ ;  $df=1, 213$ ;  $P<0.001$ ), type of accident (7.6%;  $F$  change= $7.14$ ;  $df=3, 213$ ;  $P<0.001$ ),  
28  
29 and IES intrusion added unique variance (2.0%;  $F=5.63$ ;  $df=1, 213$ ;  $P=0.019$ ). These five  
30  
31 variables were then treated as the first set added in hierarchical regressions focusing on two  
32  
33 additional predictors, patients' appraisals of accident severity and of their coping abilities.  
34  
35 These two variables were entered in the second step accounting for an additional 9.4% of the  
36  
37 variance of the time off work 6 months post accident ( $F$  change= $15.04$ ;  $df=2, 211$ ;  $P<0.001$ ).  
38  
39 Self-reported appraisal of accident severity added 6.0% ( $F$  change= $18.14$ ;  $df=1, 212$ ,  
40  
41  $P<0.001$ ), and self reported appraisal of their coping abilities added 4.7% ( $F$  change= $14.17$ ;  
42  
43  $df=1, 212$ ;  $P<0.001$ ). Finally, each of the seven predictors in table 4 was evaluated for unique  
44  
45 variance contributed with the other six predictors already in the model. The severity of the  
46  
47 injury (ISS), type of accident, and the two appraisals variables remained significant, whereas  
48  
49 age, gender, and IES intrusion did not contribute significantly to the prediction of time off  
50  
51 work.  
52  
53  
54  
55  
56  
57  
58  
59  
60

1  
2  
3  
4  
5  
6 In order to visualize the effects of appraisals on sick-leave days, the sample was divided into  
7  
8 four groups based on median-splits in the two variables appraisal of accident severity and  
9  
10 appraisal of coping abilities (fig. 1). The median was 4 Likert points in the subjective accident  
11  
12 severity scale, and 5 Likert points in the self-rated coping abilities scale. Patients with values  
13  
14 equal or higher than the median were grouped as 'higher' in the respective characteristic,  
15  
16 patients with values lower than the median were grouped as 'lower' concerning subjective  
17  
18 injury severity or self-rated coping abilities, respectively. Regarding the two groups of  
19  
20 particular interest, namely patients who assessed the accident severity as higher and their  
21  
22 coping abilities as lower, compared with patients who estimated the accident severity as lower  
23  
24 and their coping abilities as higher, there were twice as many sick-leave days for the former  
25  
26 group (mean difference=-68.1 days; 95%-CI=-85.7 to -50.5;  $t=-7.67$ ;  $df=124$ ;  $P<0.001$ ).  
27  
28  
29  
30  
31  
32  
33  
34  
35  
36  
37  
38  
39  
40  
41  
42  
43  
44  
45  
46  
47  
48  
49  
50  
51  
52  
53  
54  
55  
56  
57  
58  
59  
60

## Discussion

How patients perceive the severity of their accident and their ability to cope with the resulting injury and its job-related consequences are crucial predictors for return to work after accidental injuries which lead to hospital admission. The current study demonstrated that the patients' own appraisals of the severity of their accident and of their coping resources predict time off work after accidents beyond the impact of the objective injury severity (ISS).

Some limitations of this study have to be addressed. To enable the findings from this current study to be better generalised, we applied very few exclusion criteria. For example, we did not exclude patients with pre-existing somatic and psychiatric morbidity. While this may have strengthened the external validity of our findings, factors other than the accidental injury might have influenced outcomes. By including patients with pre-existing somatic and psychiatric morbidity we possibly included patients who were at higher risk for sick-leave following accidental injury. However, patients suffering from pre-existing mental disorders did not differ from other patients with regard to the number of sick-leave days. Furthermore, there were 68 (23.5%) drop-outs from T1 to T2 in our study. It is unlikely that these drop-outs affected the results substantially as they did not differ significantly from the final sample. Finally, the number of days off work was assessed by means of self-rating by the patients. Strict data privacy protection laws in Switzerland prevent the use of health insurance companies' data for the purpose of research projects. Such data would have been more reliable.

The relevance of psychosocial and subjective factors for a successful return to work after accidents has been increasingly recognised in literature.<sup>6 10 18 24 25 33</sup> Extending the findings

1  
2  
3  
4  
5 from previous studies among severely injured accident victims,<sup>6 7 12</sup> the current study  
6 confirmed the predictive value of patients' subjective appraisals of the accident severity for  
7  
8 the whole spectrum of patients admitted to hospitals with accidental injuries. In contrast to our  
9  
10 previous study in severely injured accident victims who were hospitalised at the ICU,<sup>7 12</sup> the  
11  
12 current study included all accidental injuries leading to hospital admission, with only 18.6%  
13  
14 of the patients requiring ICU treatment. In an effort to enable the findings from this current  
15  
16 study to be better generalised, unlike in our previous study<sup>7 12</sup>, we did not exclude foreign  
17  
18 language patients and patients with pre-existing somatic illnesses and mental disorders. In  
19  
20 some cases these particular patients may be less well socially integrated or have greater  
21  
22 difficulties dealing with the consequences of accidental injuries; both being risk factors for  
23  
24 work disability. In our sample including moderately injured and foreign language accident  
25  
26 victims with pre-existing somatic and psychiatric morbidity, the subjectively experienced  
27  
28 accident severity predicted time off work after the accidents to the same degree as the  
29  
30 objective injury severity (regression weights: Betas = .24 vs. .25). The role of the objective  
31  
32 injury severity regarding time off work after accidental injuries is ambiguous. In keeping with  
33  
34 some previous studies,<sup>2 6 7</sup> we found the more severe injuries to be related to more days off  
35  
36 work. However, some other studies could not find that association.<sup>8 10 11 34</sup> These inconsistent  
37  
38 findings might be explained by the different ranges of injury severities and by the different  
39  
40 follow-up intervals used in different studies. The wider the range of injury severities in a  
41  
42 study, the higher the chance that the severity of the physical impairment predicts subsequent  
43  
44 time off work. The more time that has elapsed since the accident, the less impact the objective  
45  
46 injury severity is expected to have on time off work. The physical condition may play a more  
47  
48 important role immediately following the accident because hospitalisation and rehabilitation  
49  
50 directly contribute to the time off work, whereas in the longer term other factors might gain in  
51  
52  
53  
54  
55  
56  
57  
58  
59  
60

1  
2  
3  
4  
5  
6 importance regarding sick-leave. In our previous study among severely injured accident  
7  
8 victims, the objective injury severity predicted time off work during the first year after the  
9  
10 accident but was no longer predictive for the number of days off work at the three year follow-  
11  
12 up.<sup>7 12</sup> In a longer term perspective, factors other than the objective physical impairment, e.g.  
13  
14 psychosocial or subjective factors, might gain in importance regarding return to work.  
15  
16

17  
18  
19 Concerning subjective factors predicting return to work, the patients' appraisals of the ability  
20  
21 to cope with the accidental injury and its job-related consequences turned out to be another  
22  
23 important predictor of sick-leave after hospital admissions due to accidental injuries. The  
24  
25 more coping resources patients perceived themselves to have at their disposal immediately  
26  
27 after the accident, the better his or her chances for vocational rehabilitation actually were. The  
28  
29 significance of subjectively perceived coping abilities for return to work has already been  
30  
31 found in earlier studies.<sup>7 11 12</sup> The predictive value of the patients' appraisals of the accident  
32  
33 severity and of the coping abilities regarding time off work after accidental injuries may be  
34  
35 explained by Lazarus' theories on stress, appraisal and coping.<sup>35 36</sup> Lazarus emphasized the  
36  
37 significance of primary and secondary appraisal of a stressful situation or event. In a primary  
38  
39 appraisal the same situation can be judged as harmful, as a threat or as a challenge by different  
40  
41 individuals. In a secondary appraisal the individual judges the ability to cope with the  
42  
43 situation depending on his or her individual coping strategies. If a stressful situation is  
44  
45 appraised as controllable by action, problem-focused coping will predominate. In a situation  
46  
47 viewed as refractory to change, however, emotion-focused coping is more likely to  
48  
49 predominate. Among accident victims these two steps of appraisals seem to be related. In our  
50  
51 sample, the more threatening the patients judged their accident to have been, the fewer  
52  
53 resources they perceived themselves to have at their disposal for coping with the accidental  
54  
55  
56  
57  
58  
59  
60



1  
2  
3  
4  
5  
6 injury and its job-related consequences. However, the subjective appraisal of the coping  
7  
8 abilities was not correlated with the objective injury severity. This further emphasizes the  
9  
10 importance of considering not only the patient's objective injury severity but also their own  
11  
12 appraisal of the accident severity and the coping abilities when predicting the chances of  
13  
14 return to work. Coping with stressful events is increasingly viewed as a process rather than an  
15  
16 inert (personality) style. If coping is open to change over time in accordance with the  
17  
18 situational context,<sup>28 35</sup> this may be promising for preventive and therapeutic interventions.  
19  
20  
21  
22  
23  
24  
25  
26  
27  
28  
29  
30  
31  
32  
33  
34  
35  
36  
37  
38  
39  
40  
41  
42  
43  
44  
45  
46  
47  
48  
49  
50  
51  
52  
53  
54  
55  
56  
57  
58  
59  
60

## Conclusion

A patient's own appraisal of the severity of their accident and of their ability to cope with the accidental injury and its job-related consequences, are highly relevant for return to work after accidents leading to hospital admission. Both subjective appraisals predict time off work beyond the impact of the objective injury severity in the whole spectrum of patients hospitalised due to accidental injuries.

In Western countries the quality of surgical care of accident victims has reached a high standard. In patients hospitalised with accidental injuries, even where acute surgical care is inevitable, from a less immediate standpoint and bearing in mind future rehabilitation, a patient's subjective assessment seems to gain in importance where their recovery is concerned. It appears that relevant prognostic information regarding return to work can be obtained by asking the patient two simple questions:

- 1.) How severe do you think your accident was?
- 2.) How well do you think you will be able to handle the consequences of the accident with regard to return to work?

Any comprehensive treatment following accidental injuries should routinely be accompanied by a brief psychosocial assessment and should include information and practical advice.

## Article summary

### Article focus

- Sick leave is one of the most important contributors to the indirect costs of accidental injuries and often surpasses the direct costs of treatment.
- In severely injured accident victims sick leave depends to a considerable degree on the patients' own appraisal of the severity of the accident and their coping abilities.
- In this study we examined whether the significance of patients' subjective appraisals for return to work may be replicated in a larger and less selective sample of patients with any accidental injury requiring hospital admission.

### Key messages

- The patients' own appraisals of the severity of their accidents and of their coping abilities are highly relevant for return to work in the whole spectrum of hospitalised accident victims.
- The answers to two simple questions about patients' appraisals of the accident severity and their perceived coping abilities provide relevant prognostic information regarding return to work.
- A comprehensive treatment after accidental injuries should routinely be accompanied by a psychosocial assessment which includes giving information and practical advice.

### Strengths and limitations of the study

- The application of very few exclusion criteria may have strengthened the study's external validity (generalisability), but at the same time may have limited its internal validity (i.e., factors other than the accidental injury might have influenced time off work).
- There were 68 (23.5%) drop-outs from baseline to follow-up, which however did not differ from the completers with respect to available patient and accident-related characteristics.
- The number of days off work was assessed by means of self-rating by the patients due to strict data privacy protection laws in Switzerland.

**Copyright**

The Corresponding Author has the right to grant on behalf of all authors and does grant on behalf of all authors, an exclusive licence (or non exclusive for government employees) on a worldwide basis to the BMJ Publishing Group Ltd to permit this article (if accepted) to be published in BMJ editions and any other BMJ PGL products and sublicences such use and exploit all subsidiary rights, as set out in our licence.

**Competing interests**

This study was supported by the Swiss National Science Foundation (32-053736.98). The Swiss National Science Foundation is a government-funded national institution. No commercial sponsorship was involved in the design and conduct of the study. All authors declare that they have no financial relationships with any organisation that might have an interest in the submitted work in the previous three years, and that they have no other relationships or activities that could appear to have influenced the submitted work.

**Author contributions**

US and HM designed the study. HM, SHB and JFP were involved in the data collection. HM performed the statistical analyses. UH, HM, NS, US were involved in the interpretation of the data. NS, UH and HM drafted the manuscript. US reviewed the manuscript several times. All authors have read and approved the final version of the manuscript.

**Data sharing**

There is no additional data available.

## References

1. Bauer R, Steiner M. Injuries in the European Union. Statistics Summary 2005-2007. Vienna: KfV, Austrian Road Safety Board, 2009.
2. MacKenzie EJ, Morris JA, Jr., Jurkovich GJ, Yasui Y, Cushing BM, Burgess AR, et al. Return to work following injury: the role of economic, social, and job-related factors. *Am J Public Health* 1998;88(11):1630-7.
3. Leigh JP, Markowitz SB, Fahs M, Shin C, Landrigan PJ. Occupational injury and illness in the United States. Estimates of costs, morbidity, and mortality. *Arch Intern Med* 1997;157(14):1557-68.
4. Ebel BE, Mack C, Diehr P, Rivara FP. Lost working days, productivity, and restraint use among occupants of motor vehicles that crashed in the United States. *Inj Prev* 2004;10(5):314-9.
5. MacKenzie EJ, Shapiro S, Smith RT, Siegel JH, Moody M, Pitt A. Factors influencing return to work following hospitalization for traumatic injury. *Am J Public Health* 1987;77(3):329-34.
6. Soberg HL, Finset A, Bautz-Holter E, Sandvik L, Roise O. Return to work after severe multiple injuries: a multidimensional approach on status 1 and 2 years postinjury. *The Journal of trauma* 2007;62(2):471-81.
7. Schnyder U, Moergeli H, Klaghofer R, Sensky T, Buchi S. Does patient cognition predict time off from work after life-threatening accidents? *Am J Psychiatry* 2003;160(11):2025-31.
8. Michaels AJ, Michaels CE, Moon CH, Zimmerman MA, Peterson C, Rodriguez JL. Psychosocial factors limit outcomes after trauma. *The Journal of trauma* 1998;44(4):644-8.

- 1  
2  
3  
4  
5  
6  
7  
8  
9  
10  
11  
12  
13  
14  
15  
16  
17  
18  
19  
20  
21  
22  
23  
24  
25  
26  
27  
28  
29  
30  
31  
32  
33  
34  
35  
36  
37  
38  
39  
40  
41  
42  
43  
44  
45  
46  
47  
48  
49  
50  
51  
52  
53  
54  
55  
56  
57  
58  
59  
60
9. Zelle BA, Panzica M, Vogt MT, Sittaro NA, Krettek C, Pape HC. Influence of workers' compensation eligibility upon functional recovery 10 to 28 years after polytrauma. *American journal of surgery* 2005;190(1):30-6.
  10. Davydow DS, Zatzick DF, Rivara FP, Jurkovich GJ, Wang J, Roy-Byrne PP, et al. Predictors of posttraumatic stress disorder and return to usual major activity in traumatically injured intensive care unit survivors. *General hospital psychiatry* 2009;31(5):428-35.
  11. Lange C, Burgmer M, Braunheim M, Heuft G. Prospective analysis of factors associated with work reentry in patients with accident-related injuries. *J Occup Rehabil* 2007;17(1):1-10.
  12. Hepp U, Moergeli H, Buchi S, Bruchhaus-Steinert H, Sensky T, Schnyder U. The long-term prediction of return to work following serious accidental injuries: a follow up study. *BMC Psychiatry* 2011;11:53.
  13. Hunter SJ, Shaha S, Flint D, Tracy DM. Predicting return to work. A long-term follow-up study of railroad workers after low back injuries. *Spine* 1998;23(21):2319-28.
  14. Brewin CR, Robson MJ, Shapiro DA. Social and psychological determinants of recovery from industrial injuries. *Injury* 1983;14(5):451-5.
  15. Andersson AL, Bunketorp O, Allebeck P. High rates of psychosocial complications after road traffic injuries. *Injury* 1997;28(8):539-43.
  16. Rusch MD, Dzwierzynski WW, Sanger JR, Pruitt NT, Siewert AD. Return to work outcomes after work-related hand trauma: the role of causal attributions. *The Journal of hand surgery* 2003;28(4):673-7.

- 1  
2  
3  
4  
5  
6  
7  
8  
9  
10  
11  
12  
13  
14  
15  
16  
17  
18  
19  
20  
21  
22  
23  
24  
25  
26  
27  
28  
29  
30  
31  
32  
33  
34  
35  
36  
37  
38  
39  
40  
41  
42  
43  
44  
45  
46  
47  
48  
49  
50  
51  
52  
53  
54  
55  
56  
57  
58  
59  
60
17. Hou WH, Sheu CF, Liang HW, Hsieh CL, Lee Y, Chuang HY, et al. Trajectories and predictors of return to work after traumatic limb injury--a 2-year follow-up study. *Scand J Work Environ Health* 2012;38(5):456-66.
  18. Mondloch MV, Cole DC, Frank JW. Does how you do depend on how you think you'll do? A systematic review of the evidence for a relation between patients' recovery expectations and health outcomes. *Cmaj* 2001;165(2):174-9.
  19. Ozegovic D, Carroll LJ, Cassidy JD. What influences positive return to work expectation? Examining associated factors in a population-based cohort of whiplash-associated disorders. *Spine (Phila Pa 1976)* 2010;35(15):E708-13.
  20. Hansen A, Edlund C, Henningsson M. Factors relevant to a return to work: a multivariate approach. *Work* 2006;26(2):179-90.
  21. Heijbel B, Josephson M, Jensen I, Stark S, Vingard E. Return to work expectation predicts work in chronic musculoskeletal and behavioral health disorders: prospective study with clinical implications. *J Occup Rehabil* 2006;16(2):173-84.
  22. Lindell O, Johansson SE, Strender LE. Predictors of stable return-to-work in non-acute, non-specific spinal pain: low total prior sick-listing, high self prediction and young age. A two-year prospective cohort study. *BMC Fam Pract* 2010;11:53.
  23. Lanes TC, Gauron EF, Spratt KF, Wernimont TJ, Found EM, Weinstein JN. Long-term follow-up of patients with chronic back pain treated in a multidisciplinary rehabilitation program. *Spine* 1995;20(7):801-6.
  24. Toien K, Skogstad L, Ekeberg O, Myhren H, Schou Bredal I. Prevalence and predictors of return to work in hospitalised trauma patients during the first year after discharge: a prospective cohort study. *Injury* 2012;43(9):1606-13.



- 1  
2  
3  
4  
5  
6  
7  
8  
9  
10  
11  
12  
13  
14  
15  
16  
17  
18  
19  
20  
21  
22  
23  
24  
25  
26  
27  
28  
29  
30  
31  
32  
33  
34  
35  
36  
37  
38  
39  
40  
41  
42  
43  
44  
45  
46  
47  
48  
49  
50  
51  
52  
53  
54  
55  
56  
57  
58  
59  
60
25. Clay FJ, Fitzharris M, Kerr E, McClure RJ, Watson WL. The association of social functioning, social relationships and the receipt of compensation with time to return to work following unintentional injuries to Victorian workers. *J Occup Rehabil* 2012;22(3):363-75.
26. Baker SP, O'Neill B. The injury severity score: an update. *The Journal of trauma* 1976;16(11):882-5.
27. Teasdale G, Jennett B. Assessment of coma and impaired consciousness. A practical scale. *Lancet* 1974;2(7872):81-4.
28. Hepp U, Moergeli H, Buchi S, Wittmann L, Schnyder U. Coping with serious accidental injury: a one-year follow-up study. *Psychother Psychosom* 2005;74(6):379-86.
29. Schnyder U, Wittmann L, Friedrich-Perez J, Hepp U, Moergeli H. Posttraumatic stress disorder following accidental injury: rule or exception in Switzerland? *Psychother Psychosom* 2008;77(2):111-8.
30. Horowitz M, Wilner N, Alvarez W. Impact of Event Scale: a measure of subjective stress. *Psychosom Med* 1979;41(3):209-18.
31. Spitzer RL, Williams JB, Kroenke K, Linzer M, deGruy FV, 3rd, Hahn SR, et al. Utility of a new procedure for diagnosing mental disorders in primary care. The PRIME-MD 1000 study. *Jama* 1994;272(22):1749-56.
32. Sundin EC, Horowitz MJ. Horowitz's Impact of Event Scale evaluation of 20 years of use. *Psychosom Med* 2003;65(5):870-6.
33. MacEachen E, Clarke J, Franche RL, Irvin E. Systematic review of the qualitative literature on return to work after injury. *Scand J Work Environ Health* 2006;32(4):257-69.

- 1  
2  
3  
4  
5  
6 34. Post RB, van der Sluis CK, Ten Duis HJ. Return to work and quality of life in severely  
7  
8 injured patients. *Disability and rehabilitation* 2006;28(22):1399-404.  
9  
10 35. Lazarus RS. Coping theory and research: past, present, and future. *Psychosom Med*  
11  
12 1993;55(3):234-47.  
13  
14 36. Lazarus RS, Folkman S. *Stress, Appraisal and Coping*. New York: Springer, 1984.  
15  
16  
17  
18  
19  
20  
21  
22  
23  
24  
25  
26  
27  
28  
29  
30  
31  
32  
33  
34  
35  
36  
37  
38  
39  
40  
41  
42  
43  
44  
45  
46  
47  
48  
49  
50  
51  
52  
53  
54  
55  
56  
57  
58  
59  
60

1  
2  
3  
4  
5  
6  
7  
8  
9  
10  
11  
12  
13  
14  
15  
16  
17  
18  
19  
20  
21  
22  
23  
24  
25  
26  
27  
28  
29  
30  
31  
32  
33  
34  
35  
36  
37  
38  
39  
40  
41  
42  
43  
44  
45  
46  
47  
48  
49  
50  
51  
52  
53  
54  
55  
56  
57  
58  
59  
60

Figure captions

Figure 1

Sick-leave days of accident victims depending on appraisals of injury severity and coping abilities (N=221, n=31 to 78 per group). Comparison of the group „lower appraisal of injury severity and higher appraisal of coping abilities” with the three other groups: \*\*\*  $p \leq .001$ .

For peer review only

**Table 1| Socio-demographic characteristics of injured accident victims (N=221)**

| Variable                                    | No          | Percentage |
|---------------------------------------------|-------------|------------|
| Age (years)*                                | 40.0 (12.1) |            |
| Sex:                                        |             |            |
| Male                                        | 156         | 70.6       |
| Marital status:                             |             |            |
| Single                                      | 103         | 46.6       |
| Married                                     | 87          | 39.4       |
| Divorced/widowed                            | 31          | 14.0       |
| Living arrangements:                        |             |            |
| Alone                                       | 65          | 29.4       |
| With others (family, partner, friends)      | 156         | 70.6       |
| Maximum educational level:                  |             |            |
| No education                                | 2           | 0.9        |
| Obligatory school                           | 33          | 14.9       |
| Apprenticeship                              | 121         | 54.8       |
| College                                     | 13          | 5.9        |
| Technical or commercial college/University  | 52          | 23.5       |
| Employment status:                          |             |            |
| Paid work (full-time)                       | 159         | 71.9       |
| Paid work (part-time)                       | 37          | 16.7       |
| In education/ student (part-time paid work) | 21          | 9.5        |
| Unemployed at time of accident              | 4           | 1.8        |

Return to work 28

## Nationality

|                          |     |      |
|--------------------------|-----|------|
| Swiss                    | 163 | 73.8 |
| German/ Austrian         | 16  | 7.2  |
| South European countries | 24  | 10.9 |
| Balkan countries         | 14  | 6.3  |
| Others                   | 4   | 1.8  |

---

\*Mean (standard deviation)

Table 2| Injury related characteristics of injured accident victims (N=221)

| Variable                                                                                | Mean | Standard<br>Deviation | Minimum | Maximum |
|-----------------------------------------------------------------------------------------|------|-----------------------|---------|---------|
| Injury Severity Score                                                                   | 12.1 | 10.1                  | 1       | 66      |
| Glasgow Coma Scale                                                                      | 14.8 | 0.7                   | 9       | 15      |
| Length of stay (days) at the<br>intensive care unit*                                    | 4.0  | 3.7                   | 1       | 19      |
| Length of stay (days) at the<br>University Hospital <sup>†‡</sup>                       | 15.8 | 16.9                  | 2       | 110     |
| Length of stay (days) at the<br>University Hospital and<br>Rehabilitation <sup>†‡</sup> | 23.1 | 28.8                  | 2       | 163     |
| Time off work at T2 <sup>‡</sup>                                                        | 95.7 | 58.1                  | 6       | 183     |

\*n=41 cases at the intensive care unit

<sup>†</sup> n=220

<sup>‡</sup>Subsumes the row above it

Return to work 30

**Table 3| Bivariate correlations (Pearson correlation coefficients) between potential predictor variables (assessed 3-28 days after the accident) to each other and to the dependent variable time off work due to the accidental injury (assessed 6 months after the accident) (N=221).**

| Variable | TOW      | ISS     | Sex*     | Age      | TRAFF    | WORK     | SPORT | IESIN   | AIS     |
|----------|----------|---------|----------|----------|----------|----------|-------|---------|---------|
| ISS      | 0.35***  |         |          |          |          |          |       |         |         |
| Sex      | -0.08    | -0.17*  |          |          |          |          |       |         |         |
| Age      | 0.09     | -0.19** | 0.09     |          |          |          |       |         |         |
| TRAFF    | -0.01    | 0.27*** | 0.01     | -0.22*** |          |          |       |         |         |
| WORK     | 0.23***  | 0.01    | -0.23*** | 0.16*    | -0.21**  |          |       |         |         |
| SPORT    | -0.28*** | -0.21** | 0.04     | -0.06    | -0.26*** | -0.23*** |       |         |         |
| IESIN    | 0.21**   | 0.23*** | 0.11     | 0.03     | 0.10     | -0.08    | -0.04 |         |         |
| AAS      | 0.40***  | 0.34*** | -0.06    | -0.02    | 0.12     | 0.13     | -0.13 | 0.27*** |         |
| ACC      | -0.29*** | -0.08   | -0.01    | -0.01    | -0.01    | -0.09    | 0.06  | -0.15*  | -0.19** |

TOW=time off work (days) due to the accidental injury; ISS=Injury Severity Score; TRAFF=traffic accident; SPORT=sports or leisure

accident; WORK=workplace accident; IESIN=Impact of Event Scale–intrusion subscale; AAS=appraisal of accident severity;

ACA=appraisal of coping abilities.

\*Sex: 1=male, 2=female

\* $p \leq 0.05$ , \*\* $p \leq 0.01$ , \*\*\* $p \leq 0.001$

For peer review only

1  
2  
3  
4  
5  
6  
7  
8  
9  
10  
11  
12  
13  
14  
15  
16  
17  
18  
19  
20  
21  
22  
23  
24  
25  
26  
27  
28  
29  
30  
31  
32  
33  
34  
35  
36  
37  
38  
39  
40  
41  
42  
43  
44  
45  
46  
47  
48  
49



**Table 4| Prediction of time off work over 6 months after the accident**

| Predictor variable             | Beta | 95%-CI for Beta |       | p     |
|--------------------------------|------|-----------------|-------|-------|
| Injury Severity Score          | .25  | 0.12            | 0.37  | <.001 |
| Female gender                  | -.01 | -0.13           | 0.11  | .893  |
| Age                            | .09  | -0.03           | 0.21  | .140  |
| Type of accident:              |      |                 |       |       |
| Traffic                        | -.12 | -0.24           | 0.01  | .062  |
| Workplace                      | .10  | -0.02           | 0.23  | .112  |
| Sports/leisure                 | -.18 | -0.31           | -0.06 | .003  |
| IES intrusion subscale         | .07  | -0.05           | 0.19  | .261  |
| Appraisal of accident severity | .24  | 0.12            | 0.36  | <.001 |
| Appraisal of coping abilities  | -.19 | -0.31           | -0.08 | .001  |

Multiple Regression: N=221; R=0.58; R<sup>2</sup>=0.34; F=11.93, df=9, 211; P<0.001.

1  
2  
3  
4  
5  
6  
7  
8  
9  
10  
11  
12  
13  
14  
15  
16  
17  
18  
19  
20  
21  
22  
23  
24  
25  
26  
27  
28  
29  
30  
31  
32  
33  
34  
35  
36  
37  
38  
39  
40  
41  
42  
43  
44  
45  
46  
47  
48  
49  
50  
51  
52  
53  
54  
55  
56  
57  
58  
59  
60

Figure 1

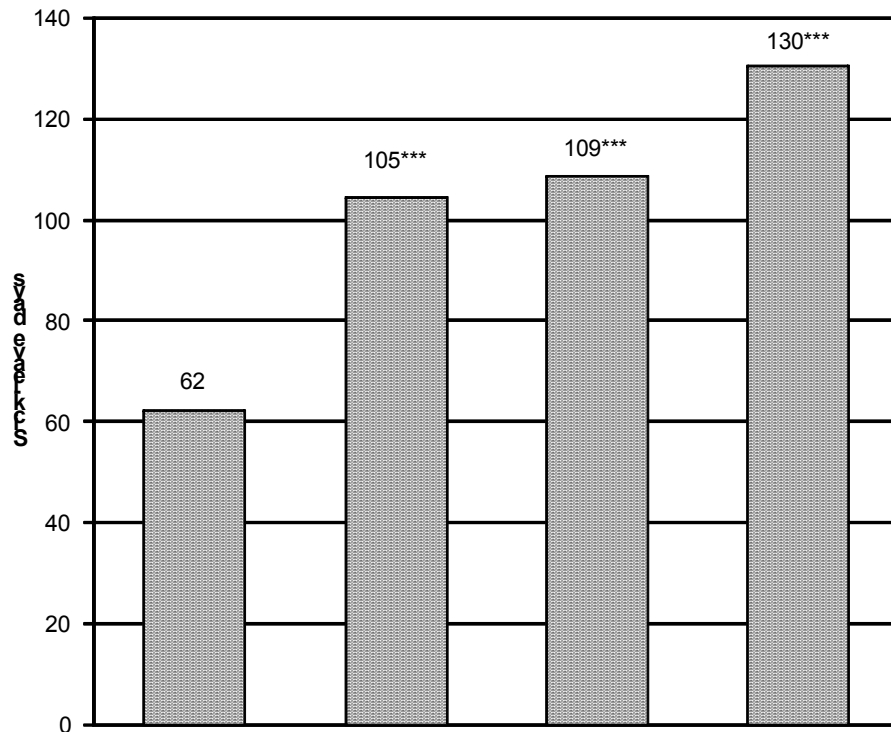

|                                               |        |        |       |        |
|-----------------------------------------------|--------|--------|-------|--------|
| <b>Initial appraisal of accident severity</b> | Lower  | Higher | Lower | Higher |
| <b>Initial appraisal of coping abilities</b>  | Higher | Higher | Lower | Lower  |

only

STROBE Statement—Checklist of items that should be included in reports of *cohort studies*

page (5)

|                              | Item No | Recommendation                                                                                                                                                                                               |         |
|------------------------------|---------|--------------------------------------------------------------------------------------------------------------------------------------------------------------------------------------------------------------|---------|
| <b>Title and abstract</b>    | 1       | (a) Indicate the study's design with a commonly used term in the title or the abstract                                                                                                                       | 1       |
|                              |         | (b) Provide in the abstract an informative and balanced summary of what was done and what was found                                                                                                          | 2       |
| <b>Introduction</b>          |         |                                                                                                                                                                                                              |         |
| Background/rationale         | 2       | Explain the scientific background and rationale for the investigation being reported                                                                                                                         | 3-4     |
| Objectives                   | 3       | State specific objectives, including any prespecified hypotheses                                                                                                                                             | 4       |
| <b>Methods</b>               |         |                                                                                                                                                                                                              |         |
| Study design                 | 4       | Present key elements of study design early in the paper                                                                                                                                                      | 6       |
| Setting                      | 5       | Describe the setting, locations, and relevant dates, including periods of recruitment, exposure, follow-up, and data collection                                                                              | 5-6     |
| Participants                 | 6       | (a) Give the eligibility criteria, and the sources and methods of selection of participants. Describe methods of follow-up                                                                                   | 5-6     |
|                              |         | (b) For matched studies, give matching criteria and number of exposed and unexposed                                                                                                                          | —       |
| Variables                    | 7       | Clearly define all outcomes, exposures, predictors, potential confounders, and effect modifiers. Give diagnostic criteria, if applicable                                                                     | 7-8     |
| Data sources/<br>measurement | 8*      | For each variable of interest, give sources of data and details of methods of assessment (measurement). Describe comparability of assessment methods if there is more than one group                         | 7-8     |
| Bias                         | 9       | Describe any efforts to address potential sources of bias                                                                                                                                                    | 8       |
| Study size                   | 10      | Explain how the study size was arrived at                                                                                                                                                                    | 5-6     |
| Quantitative variables       | 11      | Explain how quantitative variables were handled in the analyses. If applicable, describe which groupings were chosen and why                                                                                 | 8-9     |
| Statistical methods          | 12      | (a) Describe all statistical methods, including those used to control for confounding                                                                                                                        | 8-9     |
|                              |         | (b) Describe any methods used to examine subgroups and interactions                                                                                                                                          | 8-9     |
|                              |         | (c) Explain how missing data were addressed                                                                                                                                                                  | 6-7     |
|                              |         | (d) If applicable, explain how loss to follow-up was addressed                                                                                                                                               | 6-7     |
|                              |         | (e) Describe any sensitivity analyses                                                                                                                                                                        | —       |
| <b>Results</b>               |         |                                                                                                                                                                                                              |         |
| Participants                 | 13*     | (a) Report numbers of individuals at each stage of study—eg numbers potentially eligible, examined for eligibility, confirmed eligible, included in the study, completing follow-up, and analysed            | 5-7     |
|                              |         | (b) Give reasons for non-participation at each stage                                                                                                                                                         | 5-7     |
|                              |         | (c) Consider use of a flow diagram                                                                                                                                                                           | —       |
| Descriptive data             | 14*     | (a) Give characteristics of study participants (eg demographic, clinical, social) and information on exposures and potential confounders                                                                     | Table 1 |
|                              |         | (b) Indicate number of participants with missing data for each variable of interest                                                                                                                          | 6-7     |
|                              |         | (c) Summarise follow-up time (eg, average and total amount)                                                                                                                                                  | 6       |
| Outcome data                 | 15*     | Report numbers of outcome events or summary measures over time                                                                                                                                               | 10      |
| Main results                 | 16      | (a) Give unadjusted estimates and, if applicable, confounder-adjusted estimates and their precision (eg, 95% confidence interval). Make clear which confounders were adjusted for and why they were included | 10-12   |
|                              |         | (b) Report category boundaries when continuous variables were categorized                                                                                                                                    | 12      |
|                              |         | (c) If relevant, consider translating estimates of relative risk into absolute risk for a meaningful time period                                                                                             | —       |

|    |                          |    |                                                                                                                                                                            |                  |
|----|--------------------------|----|----------------------------------------------------------------------------------------------------------------------------------------------------------------------------|------------------|
| 1  |                          |    |                                                                                                                                                                            |                  |
| 2  | Other analyses           | 17 | Report other analyses done—eg analyses of subgroups and interactions, and sensitivity analyses                                                                             | page(s)<br>10-11 |
| 3  |                          |    |                                                                                                                                                                            |                  |
| 4  | <b>Discussion</b>        |    |                                                                                                                                                                            |                  |
| 5  |                          |    |                                                                                                                                                                            |                  |
| 6  | Key results              | 18 | Summarise key results with reference to study objectives                                                                                                                   | 13/18            |
| 7  | Limitations              | 19 | Discuss limitations of the study, taking into account sources of potential bias or imprecision. Discuss both direction and magnitude of any potential bias                 | 13               |
| 8  |                          |    |                                                                                                                                                                            |                  |
| 9  | Interpretation           | 20 | Give a cautious overall interpretation of results considering objectives, limitations, multiplicity of analyses, results from similar studies, and other relevant evidence | 13-16/17         |
| 10 |                          |    |                                                                                                                                                                            |                  |
| 11 | Generalisability         | 21 | Discuss the generalisability (external validity) of the study results                                                                                                      | 14               |
| 12 |                          |    |                                                                                                                                                                            |                  |
| 13 | <b>Other information</b> |    |                                                                                                                                                                            |                  |
| 14 |                          |    |                                                                                                                                                                            |                  |
| 15 | Funding                  | 22 | Give the source of funding and the role of the funders for the present study and, if applicable, for the original study on which the present article is based              | 19               |
| 16 |                          |    |                                                                                                                                                                            |                  |
| 17 |                          |    |                                                                                                                                                                            |                  |

\*Give information separately for exposed and unexposed groups.

**Note:** An Explanation and Elaboration article discusses each checklist item and gives methodological background and published examples of transparent reporting. The STROBE checklist is best used in conjunction with this article (freely available on the Web sites of PLoS Medicine at <http://www.plosmedicine.org/>, Annals of Internal Medicine at <http://www.annals.org/>, and Epidemiology at <http://www.epidem.com/>). Information on the STROBE Initiative is available at <http://www.strobe-statement.org>.



**Return to work following unintentional injury: a prospective follow-up study**

|                                 |                                                                                                                                                                                                                                                                                                                                                                      |
|---------------------------------|----------------------------------------------------------------------------------------------------------------------------------------------------------------------------------------------------------------------------------------------------------------------------------------------------------------------------------------------------------------------|
| Journal:                        | <i>BMJ Open</i>                                                                                                                                                                                                                                                                                                                                                      |
| Manuscript ID:                  | bmjopen-2013-003635.R1                                                                                                                                                                                                                                                                                                                                               |
| Article Type:                   | Research                                                                                                                                                                                                                                                                                                                                                             |
| Date Submitted by the Author:   | 27-Sep-2013                                                                                                                                                                                                                                                                                                                                                          |
| Complete List of Authors:       | Hepp, Urs; Psychiatric Services Aargau AG, Schnyder, Ulrich; University Hospital Zurich, Department of Psychiatry and Psychotherapy<br>Hepp-Beg, Sofia; Private Practice, Friedrich-Perez, Josefina; Hospital Männedorf, Stulz, Niklaus; Psychiatric Services Aargau AG, Moergeli, Hanspeter; University Hospital Zurich, Department of Psychiatry and Psychotherapy |
| <b>Primary Subject Heading</b>: | Mental health                                                                                                                                                                                                                                                                                                                                                        |
| Secondary Subject Heading:      | Emergency medicine                                                                                                                                                                                                                                                                                                                                                   |
| Keywords:                       | MENTAL HEALTH, Adult surgery < SURGERY, OCCUPATIONAL & INDUSTRIAL MEDICINE, PSYCHIATRY, REHABILITATION MEDICINE                                                                                                                                                                                                                                                      |
|                                 |                                                                                                                                                                                                                                                                                                                                                                      |

SCHOLARONE™  
Manuscripts

1  
2  
3  
4  
5  
6  
7  
8 **Return to work following unintentional injury: a prospective follow-up study**  
9

10  
11  
12  
13  
14 Urs Hepp, Ulrich Schnyder, Sofia Hepp-Beg, Josefina Friedrich-Perez, Niklaus Stulz,  
15 Hanspeter Moergeli  
16  
17  
18  
19

20  
21  
22 Outpatient Department, Psychiatric Services Aargau (Teaching Hospital of the University of  
23 Zurich), CH-5201 Brugg, Switzerland Urs Hepp head of department  
24 Department of Psychiatry and Psychotherapy, University Hospital Zurich, CH-8091 Zurich,  
25 Switzerland Ulrich Schnyder head of department  
26 Private Practice, CH-8032 Zurich, Switzerland Sofia Hepp-Beg private practitioner  
27 Hospital Männedorf AG, CH-8708 Männedorf, Switzerland Josefina Friedrich-Perez senior  
28 physician  
29 Outpatient Department, Psychiatric Services Aargau (Teaching Hospital of the University of  
30 Zurich), CH-5201 Baden, Switzerland Niklaus Stulz research associate  
31 Department of Psychiatry and Psychotherapy, University Hospital Zurich, CH-8091 Zurich,  
32 Switzerland Hanspeter Moergeli senior researcher  
33  
34  
35  
36  
37  
38  
39  
40  
41  
42  
43

44 Correspondence to: U Hepp [urs.hepp@pdag.ch](mailto:urs.hepp@pdag.ch)  
45  
46  
47  
48

49 Word count: 4029  
50  
51  
52  
53  
54  
55  
56  
57  
58  
59  
60

## Abstract

### Objective

The aim of this study was to predict return to work following unintentional injuries due to accidents leading to hospital admission.

### Design

Prospective 6 months follow-up study.

### Setting

Department of trauma surgery of a university hospital.

### Participants

Consecutively recruited victims of unintentional injuries (n=221) hospitalised for a minimum of 32 hours including two consecutive nights. All participants were aged 18-65 years and able to participate in an assessment within 30 days of the accident.

### Main outcome measures

Interview-assessed number of days off work during the 6 months immediately following the accident.

### Results

The patients' subjective appraisals of a) accident severity and b) their ability to cope with the resulting injury and its job-related consequences predicted time off work following the accident beyond the impact of the objective severity of their injury and the type of accident involved.

### Conclusions

Patients' subjective appraisals of the accident severity and of their ability to cope with its consequences are highly relevant for return to work after accidents. Extending findings from



1  
2  
3  
4  
5  
6  
7  
8  
9  
10  
11  
12  
13  
14  
15  
16  
17  
18  
19  
20  
21  
22  
23  
24  
25  
26  
27  
28  
29  
30  
31  
32  
33  
34  
35  
36  
37  
38  
39  
40  
41  
42  
43  
44  
45  
46  
47  
48  
49  
50  
51  
52  
53  
54  
55  
56  
57  
58  
59  
60

previous studies in severely injured and otherwise pre-selected accident victims, this seems to apply to the whole spectrum of patients hospitalised with unintentional injuries.

For peer review only



## Article summary

### Strengths and limitations of the study

- The application of very few exclusion criteria may have strengthened the study's external validity (generalisability), but at the same time may have limited its internal validity (i.e., factors other than the unintentional, accident-related injury might have influenced time off work).
- There were 68 (23.5%) drop-outs from baseline to follow-up, which however did not differ from the completers with respect to available patient and accident-related characteristics.
- Sick leave after unintentional injuries due to accidents was assessed in terms of time off work during the follow-up period, which provided a more accurate estimation of work-related consequences of accidents than the mere assessment whether the accident victim had returned to work or not at a particular point in time.
- However, the number of days off work was assessed by means of self-reports by the patients due to strict data privacy protection laws in Switzerland.

## Introduction

In the EU every year 6.5 million people are admitted to hospitals following unintentional injuries due to accidents.<sup>1</sup> This figure corresponds to more than 1% of the 500 million inhabitants in the EU. In addition to the direct costs of the treatment, unintentional injuries cause even higher indirect costs. Sick-leave following unintentional injuries is one of the most important contributors to these indirect costs.<sup>2,3</sup> Return to work is one of the most relevant measures of functional outcome of injuries,<sup>4</sup> and there is a growing body of literature on return to work after chronic injuries such as low-back pain.<sup>5</sup> However, there are still relatively few studies on return to work after unintentional injuries due to accidents.<sup>2,6-14</sup>

Generally, return to work is not only predicted by injury related or medical factors. Job related factors,<sup>2,12,15,16</sup> socioeconomic factors,<sup>2,7,9,12,17</sup> psychological distress,<sup>9,11,12</sup> causal attribution,<sup>18</sup> and compensation eligibility<sup>10,19</sup> become increasingly important factors for return to work the longer the medical condition lasts. How patients' expectations of recovery affect their health and vocational outcome is insufficiently researched.<sup>20,21</sup> Compared to those remaining on sick-leave, patients returning to work after injury had stronger internal health beliefs, i.e. they believed they had an influence on their own health and considered themselves powerful.<sup>7</sup> In several studies involving various medical conditions, patients' own expectations and predictions of their future work ability predicted return to work.<sup>22-24</sup> There are relatively few studies examining the role of the subjectively experienced accident severity and the subjectively experienced ability to cope with the unintentional injury regarding return to work.<sup>7,9,13,25</sup> The findings from these studies cannot be generalised as they are compromised by their highly selective samples: the studies were either restricted to severely injured patients without pre-existing mental disorders,<sup>7,8,13,26</sup> and/or they excluded foreign-language patients.<sup>7</sup>

1  
2  
3  
4  
5  
6  
7  
8  
9  
10  
11  
12  
13  
14  
15  
16  
17  
18  
19  
20  
21  
22  
23  
24  
25  
26  
27  
28  
29  
30  
31  
32  
33  
34  
35  
36  
37  
38  
39  
40  
41  
42  
43  
44  
45  
46  
47  
48  
49  
50  
51  
52  
53  
54  
55  
56  
57  
58  
59  
60

<sup>8 12 13 19 26 27</sup> In a previous study of severely injured accident victims we found that time off work was best predicted by the patients' own appraisals of accident severity and by the patients' own expectations regarding their ability to cope with the unintentional injury and its job-related consequences.<sup>13</sup> Whereas at the one-year follow-up, injury severity measured by the injury severity score (ISS)<sup>28</sup> and type of accident (traffic, workplace, sporting/leisure) were also predictive of time off work,<sup>8</sup> at the three-years follow-up only the self-reported appraisals of accident severity and the patients' ability to cope with the unintentional injury remained predictive of days absent from the workplace.<sup>13</sup> However, the sample in this previous study was highly selective. We included only severely injured (ISS $\geq$ 10), German-speaking patients and excluded patients who had been under treatment for any mental disorders and/or serious somatic illnesses at the time of the accident. By doing this we may have excluded patients at a higher risk for sick-leave and the results may therefore not be generalised to apply to all accident survivors.

The aim of this study was to predict return to work following unintentional, accident-related injuries in an independent, larger and less selective sample of patients with any unintentional injury requiring hospital admission.

## Methods

### Sample

Participants were recruited from the Department of Trauma Surgery at the Zurich University Hospital. All the patients qualifying for the study had sustained unintentional injuries that required hospitalisation for a minimum of 32 hours including two consecutive nights (the latter guaranteed exclusion of patients who were treated in the emergency room overnight but who were not really hospitalised on a ward of the Department of Trauma Surgery). Further inclusion criteria were: age between 18 to 65 years; ability to participate in an extensive assessment within 30 days of the accident; and sufficient proficiency in one of the study languages (German, Italian, Spanish, Portuguese, Serbo-Croatian, Turkish, or Albanian) to participate in the interview and to complete the self-report questionnaires. Non-German speaking participants were assessed using interpreters and professionally translated psychometric instruments. Exclusion criteria were: a Glasgow Coma Scale score (GCS)<sup>29</sup> below 9; unconsciousness for more than 15 minutes after the accident; pathological findings in the cranial CT; attempted suicide.

In contrast to our previous study,<sup>8 13</sup> neither serious somatic illness, nor being in treatment for a mental disorder prior to the accident was an exclusion criterion in the present study.<sup>30</sup> Note that the sample of the previous study<sup>8 13</sup> and the sample of the present study on time off work were completely independent from each other (recruitment of the second sample started 18 months after the end of recruitment for the first sample). With regard to the possibility of generalising the present study's findings, we also retained patients for the present study who showed marked clinical signs or symptoms of mental disorders that were obviously unrelated to the unintentional injury.

1  
2  
3  
4  
5  
6  
7  
8 Patients were recruited over a period of 12 months. During this time period 787 patients aged  
9  
10 between 18 and 65 years were admitted with unintentional injuries. Of these patients 253 did  
11  
12 not meet the inclusion criteria due to early discharge (104; 41.1%), poor clinical condition  
13  
14 (74; 29.2%), GCS score below 9 (46; 18.2%), insufficient proficiency in one of the study  
15  
16 languages (21; 8.3%) or other reasons (29; 11.5%) (multiple reasons possible). As a result,  
17  
18 534 patients fulfilled all criteria and were eligible for the study. Due to a restricted  
19  
20 interviewing capacity, not all the eligible patients could be assessed. The following procedure  
21  
22 was applied to ensure the recruitment of a representative sample and to control for potential  
23  
24 bias attributable to the time of admission: on day 1, every other consecutive patient (i.e.  
25  
26 patient 1, 3, 5, etc.) was interviewed. On day 2 the order of the list of admissions was reversed  
27  
28 so that the last patient admitted was interviewed first, the third last patient was interviewed  
29  
30 second and so forth. On day 3, the order was reversed again, etc. The 148 patients who could  
31  
32 not be contacted due to our limited interviewing capacity did not differ from the participating  
33  
34 patients with regard to age (mean difference=-0.40 years; 95%-CI=-2.93 to 2.12;  $t=-0.31$ ;  
35  
36  $df=481$ ;  $P=0.754$ ) and gender (Pearson's  $\chi^2=0.77$ ,  $df=1$ ,  $P=0.375$ ). Of the 386 patients who  
37  
38 were contacted, 335 gave their written consent to participate. The 51 (13.2%) who declined  
39  
40 participation did not differ significantly from the participating patients with regard to age  
41  
42 (mean difference=3.75 years; 95%-CI=-0.12 to 7.61;  $t=-1.91$ ;  $df=384$ ;  $P=0.057$ ) and gender  
43  
44 (Pearson's  $\chi^2=0.07$ ;  $df=1$ ;  $P=0.792$ ).  
45  
46  
47  
48  
49  
50  
51

52 After the exclusion of a small number of victims of physical violence ( $n=12$ ), the sample  
53  
54 consisted of 323 patients who all attended the interview at T1. On average the T1 interview  
55  
56 was performed 5 days after the referral to the hospital (SD 4.2 days; range: 2 to 28 days).  
57  
58  
59  
60

1  
2  
3  
4  
5  
6 patients had no regular work and were excluded from further analyses regarding time off  
7  
8 work. However, four patients who were receiving unemployment compensation at the time of  
9  
10 the accident were retained for further analyses. For these patients accident-related time off  
11  
12 work was traceable since they needed a doctor's certificate to continue to be eligible for  
13  
14 unemployment compensation. In all, valid data regarding time off work were obtainable from  
15  
16 289 patients.  
17  
18  
19  
20

21 On average the follow-up interview (T2) took place 188 (SD 16.2; range 155 to 257) days  
22  
23 after the unintentional injury. 68 (23.5%) dropped out during the follow-up period; these 68  
24  
25 drop-outs did not differ significantly from the final sample with regard to age (mean  
26  
27 difference=-2.78 years; 95%-CI=-6.13 to 0.57;  $t=-1.63$ ;  $df=287$ ;  $P=0.104$ ), gender (Pearson's  
28  
29  $\chi^2=3.3$ ;  $df=1$ ;  $P=0.069$ ), type of accident (Pearson's  $\chi^2=6.5$ ;  $df=1$ ;  $P=0.088$ ), clinician-rated  
30  
31 Injury Severity Score<sup>28</sup> (mean difference=-0.77; 95%-CI=-3.54 to 1.99;  $t=-0.55$ ;  $df=287$ ;  
32  
33  $P=0.582$ ), and patient-rated subjective accident severity ( $t=1.19$ ;  $df=287$ ;  $P=0.237$ ), appraisal  
34  
35 of coping abilities (mean difference=-0.16; 95%-CI=-0.37 to 0.04;  $t=-1.58$ ;  $df=283$ ;  $P=0.115$ ),  
36  
37 and intrusions as measured by the Impact of Event Scale<sup>31</sup> (mean difference=0.87; 95%-CI=-  
38  
39 1.14 to 2.28;  $t=0.86$ ;  $df=276$ ;  $P=0.393$ ). The final sample consisted of 221 patients.  
40  
41  
42  
43  
44

#### 45 Measures

46  
47 The Injury Severity Score (ISS)<sup>28</sup> and the Glasgow Coma Scale (GCS)<sup>29</sup> were routinely  
48  
49 assessed by the surgeons immediately after admission to the emergency room. The ISS  
50  
51 permits an evaluation of the severity of injuries by a trauma surgeon: Each part or area of the  
52  
53 body affected is given a score (1=minimum to 6=fatal injury). If the score is 6 in one area, the  
54  
55 ISS is assigned a sum score of 75. Otherwise, the scores for the three most severely injured  
56  
57  
58  
59  
60

1  
2  
3  
4  
5  
6 areas of the body are squared and then summed, producing a maximum score of 75. Patients  
7  
8 with a score of 10 or more are generally considered severely injured. The GCS is an observer-  
9  
10 rated scale for the clinical appraisal of the gravity of coma after injury to the skull and brain.  
11  
12 Patients with severe traumatic brain injuries generally have a score under 9.

13  
14  
15  
16  
17 The semi-structured interview at T1 covered socio-demographic data, a detailed work record  
18  
19 and information about the accident. Existing pre-accident psychiatric disorders were assessed  
20  
21 using the Primary Care Evaluation of Mental Disorders.<sup>32</sup> The patients rated their appraisal of  
22  
23 the injury severity on a Likert scale ranging from “1=very slight” to “5=very severe”. They  
24  
25 also rated their ability to cope with the unintentional injury and its job-related consequences  
26  
27 on a Likert scale ranging from “1=very poor” to “5=very good”.<sup>8 13</sup> Posttraumatic  
28  
29 psychological symptoms were assessed by the Impact of Event Scale (IES),<sup>31</sup> a 15 item self-  
30  
31 rating questionnaire comprising two subscales (intrusion and avoidance) with high reliability  
32  
33 and validity.<sup>33</sup> Time off work, assessed at 6 months (T2) post-accident, was defined as the  
34  
35 patient-reported number of sick-leave days attributable to the unintentional injury and its  
36  
37 consequences including time of hospitalisation. To record their sick-leave days the patients  
38  
39 used a specified journal they received at T1. A week off work was set to equal seven days of  
40  
41 leave. Where subjects who had previously been full-time employees returned to work on a  
42  
43 part-time basis, the days on which they worked less were added to the total days of leave on a  
44  
45 pro rata basis.<sup>13</sup> The interviews were performed by two medical doctors (SHB and JFP). Each  
46  
47 patient was interviewed by the same interviewer at T1 and T2. Detailed information on the  
48  
49 study design and the interrater reliability is described in an earlier publication on the incidence  
50  
51 of PTSD in that sample.<sup>34</sup>  
52  
53  
54  
55  
56  
57  
58  
59  
60

### Statistical analysis

Hierarchical linear multiple regression analyses were performed to predict the number of sick-leave days. They allowed for highlighting the relevance of patient's appraisal among the selected potential predictor variables. To enable us to enter the type of accident (road traffic, workplace, household, or leisure-time accidents) as a predictor into the multiple regression analysis, this categorical variable was converted into a set of three new variables so that a deviation contrast resulted. In this way the effect of each accident category was compared to the mean effect of all accident categories. Since there was one new variable for each degree of freedom, one accident category (household) had to be omitted in the regression analysis. In the final regression model including all potential predictors multi-collinearity was low (tolerance >0.75) and the distribution of regression standardised residuals was normal (Kolmogorov-Smirnov  $Z=0.63$ ,  $P=0.827$ ). Group comparisons of dimensional variables were performed with t-tests.

### Ethical approval

Ethical approval was granted by the Ethics Committee of the Canton of Zurich. Written informed consent was obtained from all participants.



## Results

The socio-demographic characteristics are presented in table 1. 35 (15.8%) of the 221 patients suffered from one or multiple pre-existing mental disorders immediately prior to the accident, and 31 patients (14.0%) did not speak German. Characteristics related to the unintentional injury of the 221 patients are found in table 2. The types of accident were as follows: 72 (32.6%) traffic accidents, 66 (29.9%) workplace accidents, 6 (2.7%) household accidents, and 77 (34.8%) sports/leisure activity-related accidents. The mean ISS differed significantly between the types of accident (traffic: M 16.0, SD 12.4; workplace or household: M 11.8, SD 8.2; sporting/leisure activity: M 8.7, SD 7.7; ANOVA:  $F=10.7$ ;  $df=2, 218$ ;  $P<0.001$ ).

According to the surgeons' files, 44 (19.9%) patients sustained a mild or moderate traumatic brain injury (MTBI). 41 (18.6%) patients were first referred to the intensive care unit (ICU), with a mean duration of ICU stay of 4.0 days (SD 3.7; range 1-19). The mean length of stay at the acute hospital including the ICU was 15.8 days (SD 16.9; range 2-110). 46 patients had a further stay in a rehabilitation hospital, with a mean length of stay of 35.0 days (SD 25.0; range 3-141). The mean number of sick-leave days was 95.7 (SD 58.1; range 6-183). Patients suffering from pre-existing mental disorders did not differ significantly from the rest of the sample with regard to the number of sick-leave days (mean difference=2.7 days; 95%-CI=-18.4 to 23.8;  $t=0.25$ ;  $df=219$ ;  $P=0.801$ ).

Bivariate correlations of all variables included in the regression analyses are presented in table 3. The objective injury severity (ISS) and the patients' subjective appraisals of the accident severity were positively correlated. Subjective appraisals of the accident severity (but not the objective injury severity scores) were negatively related with self-rated coping abilities.

1  
2  
3  
4  
5  
6 Time off work was significantly correlated with the injury severity (ISS), IES intrusion scores,  
7  
8 and the patients' own appraisals of both their injury severity and their coping abilities. Finally,  
9  
10 time off work was longer after workplace related accidents and shorter after sports/leisure  
11  
12 accidents.

13  
14  
15  
16  
17 In a simultaneous regression analysis the variables injury severity (ISS), sex, age, type of  
18  
19 accident (road traffic, workplace, or leisure-time accidents), and IES intrusion were entered as  
20  
21 potential predictors of time off work. Combined, these predictors explained 24.3% of the  
22  
23 variance of time off work ( $F=9.75$ ;  $df=7, 213$ ;  $P<0.001$ ). When in a series of hierarchical  
24  
25 regressions each of these predictors was examined when added last to this first set, ISS (8.3%,  
26  
27  $F=23.38$ ;  $df=1, 213$ ;  $P<0.001$ ), type of accident (7.6%;  $F$  change= $7.14$ ;  $df=3, 213$ ;  $P<0.001$ ),  
28  
29 and IES intrusion added unique variance (2.0%;  $F=5.63$ ;  $df=1, 213$ ;  $P=0.019$ ). These five  
30  
31 variables were then treated as the first set added in hierarchical regressions focusing on two  
32  
33 additional predictors, patients' appraisals of accident severity and of their coping abilities.  
34  
35 These two variables were entered in the second step accounting for an additional 9.4% of the  
36  
37 variance of the time off work 6 months post accident ( $F$  change= $15.04$ ;  $df=2, 211$ ;  $P<0.001$ ).  
38  
39 Self-reported appraisal of accident severity added 6.0% ( $F$  change= $18.14$ ;  $df=1, 212$ ,  
40  
41  $P<0.001$ ), and self reported appraisal of their coping abilities added 4.7% ( $F$  change= $14.17$ ;  
42  
43  $df=1, 212$ ;  $P<0.001$ ). Finally, each of the seven predictors in table 4 was evaluated for unique  
44  
45 variance contributed with the other six predictors already in the model. The severity of the  
46  
47 injury (ISS), type of accident, and the two appraisals variables remained significant, whereas  
48  
49 age, gender, and IES intrusion did not contribute significantly to the prediction of time off  
50  
51 work.  
52  
53  
54  
55  
56  
57  
58  
59  
60

1  
2  
3  
4  
5  
6 In order to visualize the effects of appraisals on sick-leave days, the sample was divided into  
7  
8 four groups based on median-splits in the two variables appraisal of accident severity and  
9  
10 appraisal of coping abilities (fig. 1). The median was 4 Likert points in the subjective accident  
11  
12 severity scale, and 5 Likert points in the self-rated coping abilities scale. Patients with values  
13  
14 equal or higher than the median were grouped as 'higher' in the respective characteristic,  
15  
16 patients with values lower than the median were grouped as 'lower' concerning subjective  
17  
18 injury severity or self-rated coping abilities, respectively. Regarding the two groups of  
19  
20 particular interest, namely patients who assessed the accident severity as higher and their  
21  
22 coping abilities as lower, compared with patients who estimated the accident severity as lower  
23  
24 and their coping abilities as higher, there were twice as many sick-leave days for the former  
25  
26 group (mean difference=-68.1 days; 95%-CI=-85.7 to -50.5;  $t=-7.67$ ;  $df=124$ ;  $P<0.001$ ).  
27  
28  
29  
30  
31  
32  
33  
34  
35  
36  
37  
38  
39  
40  
41  
42  
43  
44  
45  
46  
47  
48  
49  
50  
51  
52  
53  
54  
55  
56  
57  
58  
59  
60

## Discussion

How patients perceive the severity of their accident and their ability to cope with the resulting injury and its job-related consequences are crucial predictors for return to work after unintentional injuries which lead to hospital admission. The current study demonstrated that the patients' own appraisals of the severity of their accident and of their coping resources predict time off work after accidents leading to hospital admission beyond the impact of the objective injury severity (ISS).

Some limitations of this study have to be addressed. To enable the findings from this current study to be better generalised to all hospitalised accident victims, we applied very few exclusion criteria. For example, we did not exclude patients with pre-existing somatic and psychiatric morbidity or non-ICU patients. While this may have strengthened the external validity of our findings, factors other than the unintentional injury might have influenced outcomes. By including patients with pre-existing somatic and psychiatric morbidity we possibly included patients who were at higher risk for sick-leave following unintentional injury. However, patients suffering from pre-existing mental disorders did not differ from other patients with regard to the number of sick-leave days. The inclusion criterion of being hospitalised for at least 32 hours including two consecutive nights may limit the generalisability of the study's findings, but guaranteed that all patients in the sample were really hospitalised and not only received an overnight treatment in the emergency room (which formally is an instance of hospitalisation but in fact is an outpatient treatment).

Another factor that may affect return to work is compensation eligibility.<sup>10 19</sup> In Switzerland all inhabitants receive compensation in the case of work incapacity or disability independent of the type of accident. For employees there is a mandatory accident insurance that covers

1  
2  
3  
4  
5  
6 both work- and non-work-related injuries due to accidents. Thus, it is unlikely that different  
7  
8 compensation rules related to different types of accidents biased our results. Nevertheless, the  
9  
10 very generous compensation system in Switzerland may limit the generalisability of our  
11  
12 findings to other countries with other or less generous compensation systems. Furthermore,  
13  
14 there were 68 (23.5%) drop-outs from T1 to T2 in our study. It is unlikely that these drop-outs  
15  
16 affected the results substantially as they did not differ significantly from the final sample.  
17  
18 Finally, the number of days off work was assessed by means of self-report by the patients.  
19  
20 Strict data privacy protection laws in Switzerland prevent the use of health insurance  
21  
22 companies' data for the purpose of research projects. Such data would have been more  
23  
24 reliable.  
25  
26

27  
28  
29  
30 The relevance of psychosocial and subjective factors for a successful return to work after  
31  
32 accidents has been increasingly recognised in literature.<sup>7 11 20 26 27 35</sup> The total amount of  
33  
34 explained variance in the present study was moderate ( $R^2=.34$ ) but within the range of  
35  
36 comparable studies.<sup>8 9 12-14 26</sup> Nevertheless, this suggests that other factors than the ones we  
37  
38 examined are also important regarding return to work. Extending the findings from previous  
39  
40 studies among severely injured accident victims,<sup>7 8 13</sup> the current study confirmed the  
41  
42 predictive value of patients' subjective appraisals of the accident severity for the whole  
43  
44 spectrum of patients admitted to hospitals with unintentional injuries. In contrast to our  
45  
46 previous study in severely injured accident victims who were hospitalised at the ICU,<sup>8 13</sup> the  
47  
48 completely independent sample of the current study included all unintentional injuries leading  
49  
50 to hospital admission, with only 18.6% of the patients requiring ICU treatment. In an effort to  
51  
52 enable the findings from this current study to be better generalised, unlike in our previous  
53  
54 study with another sample,<sup>8 13</sup> we did not exclude foreign language patients and patients with  
55  
56  
57  
58  
59  
60

1  
2  
3  
4  
5  
6 pre-existing somatic illnesses and mental disorders. In some cases these particular patients  
7  
8 may be less well socially integrated or have greater difficulties dealing with the consequences  
9  
10 of unintentional injuries; both being risk factors for work disability. In our heterogeneous  
11  
12 sample including moderately injured and foreign language accident victims with pre-existing  
13  
14 somatic and psychiatric morbidity, the subjectively experienced accident severity predicted  
15  
16 time off work after the accidents to the same degree as the objective injury severity  
17  
18 (regression weights: Betas = .24 vs. .25). The role of the objective injury severity regarding  
19  
20 time off work after unintentional injuries is ambiguous. In keeping with some previous  
21  
22 studies,<sup>2 7 8</sup> we found the more severe injuries to be related to more days off work. However,  
23  
24 some other studies could not find that association.<sup>9 11 12 36</sup> These inconsistent findings might  
25  
26 be explained by the different ranges of injury severities and by the different follow-up  
27  
28 intervals used in different studies. The wider the range of injury severities in a study, the  
29  
30 higher the chance that the severity of the physical impairment predicts subsequent time off  
31  
32 work. The more time that has elapsed since the accident, the less impact the objective injury  
33  
34 severity is expected to have on time off work. The physical condition may play a more  
35  
36 important role immediately following the accident because hospitalisation and rehabilitation  
37  
38 directly contribute to the time off work, whereas in the longer term other factors might gain in  
39  
40 importance regarding sick-leave. In our previous study among severely injured accident  
41  
42 victims, the objective injury severity predicted time off work during the first year after the  
43  
44 accident but was no longer predictive for the number of days off work at the three year follow-  
45  
46 up.<sup>8 13</sup> In a longer term perspective, factors other than the objective physical impairment, e.g.  
47  
48 psychosocial or subjective factors, might gain in importance regarding return to work.  
49  
50  
51  
52  
53  
54  
55  
56  
57  
58  
59  
60

1  
2  
3  
4  
5  
6 Concerning subjective factors predicting return to work, the patients' appraisals of the ability  
7  
8 to cope with the unintentional injury and its job-related consequences turned out to be another  
9  
10 important predictor of sick-leave after hospital admissions due to unintentional, accident-  
11  
12 related injuries. The more coping resources patients perceived themselves to have at their  
13  
14 disposal immediately after the accident, the better his or her chances for vocational  
15  
16 rehabilitation actually were. The significance of subjectively perceived coping abilities for  
17  
18 return to work has already been found in earlier studies.<sup>8 12 13</sup> The predictive value of the  
19  
20 patients' appraisals of the accident severity and of the coping abilities regarding time off work  
21  
22 after unintentional injuries may be explained by Lazarus' theories on stress, appraisal and  
23  
24 coping.<sup>37 38</sup> Lazarus emphasized the significance of primary and secondary appraisal of a  
25  
26 stressful situation or event. In a primary appraisal the same situation can be judged as harmful,  
27  
28 as a threat or as a challenge by different individuals. In a secondary appraisal the individual  
29  
30 judges the ability to cope with the situation depending on his or her individual coping  
31  
32 strategies. If a stressful situation is appraised as controllable by action, problem-focused  
33  
34 coping will predominate. In a situation viewed as refractory to change, however, emotion-  
35  
36 focused coping is more likely to predominate. Among accident victims these two steps of  
37  
38 appraisals seem to be related. In our sample, the more threatening the patients judged their  
39  
40 accident to have been, the fewer resources they perceived themselves to have at their disposal  
41  
42 for coping with the unintentional injury and its job-related consequences. However, the  
43  
44 subjective appraisal of the coping abilities was not correlated with the objective injury  
45  
46 severity. This further emphasizes the importance of considering not only the patient's  
47  
48 objective injury severity but also their own appraisal of the accident severity and the coping  
49  
50 abilities when predicting the chances of return to work. Coping with stressful events is  
51  
52 increasingly viewed as a process rather than an inert (personality) style. If coping is open to  
53  
54  
55  
56  
57  
58  
59  
60

1  
2  
3  
4  
5  
6  
7  
8  
9  
10  
11  
12  
13  
14  
15  
16  
17  
18  
19  
20  
21  
22  
23  
24  
25  
26  
27  
28  
29  
30  
31  
32  
33  
34  
35  
36  
37  
38  
39  
40  
41  
42  
43  
44  
45  
46  
47  
48  
49  
50  
51  
52  
53  
54  
55  
56  
57  
58  
59  
60

change over time in accordance with the situational context,<sup>30 37</sup> this may be promising for preventive and therapeutic interventions.

For peer review only



## Conclusion

A patient's own appraisal of the severity of their accident and of their ability to cope with the unintentional injury and its job-related consequences, are highly relevant for return to work after accidents leading to hospital admission. Both subjective appraisals predict time off work beyond the impact of the objective injury severity in the whole spectrum of patients hospitalised due to unintentional injuries.

In Western countries the quality of surgical care of accident victims has reached a high standard. In patients hospitalised with unintentional injuries, even where acute surgical care is inevitable, from a less immediate standpoint and bearing in mind future rehabilitation, a patient's subjective assessment seems to gain in importance where their recovery is concerned. It appears that relevant prognostic information regarding return to work can be obtained by asking the patient two simple questions:

- 1.) How severe do you think your accident was?
- 2.) How well do you think you will be able to handle the consequences of the accident with regard to return to work?

Any comprehensive treatment following unintentional injuries should routinely be accompanied by a brief psychosocial assessment and should include information and practical advice.

**Copyright**

The Corresponding Author has the right to grant on behalf of all authors and does grant on behalf of all authors, an exclusive licence (or non exclusive for government employees) on a worldwide basis to the BMJ Publishing Group Ltd to permit this article (if accepted) to be published in BMJ editions and any other BMJ PGL products and sublicences such use and exploit all subsidiary rights, as set out in our licence.

**Competing interests**

This study was supported by the Swiss National Science Foundation (32-053736.98). The Swiss National Science Foundation is a government-funded national institution. No commercial sponsorship was involved in the design and conduct of the study. All authors declare that they have no financial relationships with any organisation that might have an interest in the submitted work in the previous three years, and that they have no other relationships or activities that could appear to have influenced the submitted work.

**Author contributions**

US and HM designed the study. HM, SHB and JFP were involved in the data collection. HM performed the statistical analyses. UH, HM, NS, US were involved in the interpretation of the data. NS, UH and HM drafted the manuscript. US reviewed the manuscript several times. All authors have read and approved the final version of the manuscript.

**Data sharing**

There is no additional data available.

## References

1. Bauer R, Steiner M. Injuries in the European Union. Statistics Summary 2005-2007. Vienna: KfV, Austrian Road Safety Board, 2009.
2. MacKenzie EJ, Morris JA, Jr., Jurkovich GJ, Yasui Y, Cushing BM, Burgess AR, et al. Return to work following injury: the role of economic, social, and job-related factors. *Am J Public Health* 1998;88(11):1630-7.
3. Leigh JP, Markowitz SB, Fahs M, Shin C, Landrigan PJ. Occupational injury and illness in the United States. Estimates of costs, morbidity, and mortality. *Arch Intern Med* 1997;157(14):1557-68.
4. Ebel BE, Mack C, Diehr P, Rivara FP. Lost working days, productivity, and restraint use among occupants of motor vehicles that crashed in the United States. *Inj Prev* 2004;10(5):314-9.
5. Loisel P, Anema JR, editors. *Handbook of Work Disability. Prevention and Management*. New York, NY: Springer, 2013.
6. MacKenzie EJ, Shapiro S, Smith RT, Siegel JH, Moody M, Pitt A. Factors influencing return to work following hospitalization for traumatic injury. *Am J Public Health* 1987;77(3):329-34.
7. Soberg HL, Finset A, Bautz-Holter E, Sandvik L, Roise O. Return to work after severe multiple injuries: a multidimensional approach on status 1 and 2 years postinjury. *The Journal of trauma* 2007;62(2):471-81.
8. Schnyder U, Moergeli H, Klaghofer R, Sensky T, Buchi S. Does patient cognition predict time off from work after life-threatening accidents? *Am J Psychiatry* 2003;160(11):2025-31.

- 1  
2  
3  
4  
5  
6 9. Michaels AJ, Michaels CE, Moon CH, Zimmerman MA, Peterson C, Rodriguez JL.  
7  
8 Psychosocial factors limit outcomes after trauma. *The Journal of trauma*  
9  
10 1998;44(4):644-8.  
11  
12 10. Zelle BA, Panzica M, Vogt MT, Sittaro NA, Krettek C, Pape HC. Influence of workers'  
13  
14 compensation eligibility upon functional recovery 10 to 28 years after polytrauma.  
15  
16 *American journal of surgery* 2005;190(1):30-6.  
17  
18 11. Davydow DS, Zatzick DF, Rivara FP, Jurkovich GJ, Wang J, Roy-Byrne PP, et al.  
19  
20 Predictors of posttraumatic stress disorder and return to usual major activity in  
21  
22 traumatically injured intensive care unit survivors. *General hospital psychiatry*  
23  
24 2009;31(5):428-35.  
25  
26 12. Lange C, Burgmer M, Braunheim M, Heuft G. Prospective analysis of factors associated  
27  
28 with work reentry in patients with accident-related injuries. *J Occup Rehabil*  
29  
30 2007;17(1):1-10.  
31  
32 13. Hepp U, Moergeli H, Buchi S, Bruchhaus-Steinert H, Sensky T, Schnyder U. The long-  
33  
34 term prediction of return to work following serious accidental injuries: a follow up  
35  
36 study. *BMC Psychiatry* 2011;11:53.  
37  
38 14. Lilley R, Davie G, Ameratunga S, Derrett S. Factors predicting work status 3 months after  
39  
40 injury: results from the Prospective Outcomes of Injury Study. *BMJ Open*  
41  
42 2012;2(2):e000400.  
43  
44 15. Hunter SJ, Shaha S, Flint D, Tracy DM. Predicting return to work. A long-term follow-up  
45  
46 study of railroad workers after low back injuries. *Spine* 1998;23(21):2319-28.  
47  
48 16. Brewin CR, Robson MJ, Shapiro DA. Social and psychological determinants of recovery  
49  
50 from industrial injuries. *Injury* 1983;14(5):451-5.  
51  
52  
53  
54  
55  
56  
57  
58  
59  
60

17. Andersson AL, Bunketorp O, Allebeck P. High rates of psychosocial complications after road traffic injuries. *Injury* 1997;28(8):539-43.
18. Rusch MD, Dzwierzynski WW, Sanger JR, Pruitt NT, Siewert AD. Return to work outcomes after work-related hand trauma: the role of causal attributions. *The Journal of hand surgery* 2003;28(4):673-7.
19. Hou WH, Sheu CF, Liang HW, Hsieh CL, Lee Y, Chuang HY, et al. Trajectories and predictors of return to work after traumatic limb injury--a 2-year follow-up study. *Scand J Work Environ Health* 2012;38(5):456-66.
20. Mondloch MV, Cole DC, Frank JW. Does how you do depend on how you think you'll do? A systematic review of the evidence for a relation between patients' recovery expectations and health outcomes. *Cmaj* 2001;165(2):174-9.
21. Ozegovic D, Carroll LJ, Cassidy JD. What influences positive return to work expectation? Examining associated factors in a population-based cohort of whiplash-associated disorders. *Spine (Phila Pa 1976)* 2010;35(15):E708-13.
22. Hansen A, Edlund C, Henningsson M. Factors relevant to a return to work: a multivariate approach. *Work* 2006;26(2):179-90.
23. Heijbel B, Josephson M, Jensen I, Stark S, Vingard E. Return to work expectation predicts work in chronic musculoskeletal and behavioral health disorders: prospective study with clinical implications. *J Occup Rehabil* 2006;16(2):173-84.
24. Lindell O, Johansson SE, Strender LE. Predictors of stable return-to-work in non-acute, non-specific spinal pain: low total prior sick-listing, high self prediction and young age. A two-year prospective cohort study. *BMC Fam Pract* 2010;11:53.

- 1  
2  
3  
4  
5  
6 25. Lanes TC, Gauron EF, Spratt KF, Wernimont TJ, Found EM, Weinstein JN. Long-term  
7  
8 follow-up of patients with chronic back pain treated in a multidisciplinary rehabilitation  
9  
10 program. *Spine* 1995;20(7):801-6.  
11  
12 26. Toien K, Skogstad L, Ekeberg O, Myhren H, Schou Bredal I. Prevalence and predictors of  
13  
14 return to work in hospitalised trauma patients during the first year after discharge: a  
15  
16 prospective cohort study. *Injury* 2012;43(9):1606-13.  
17  
18 27. Clay FJ, Fitzharris M, Kerr E, McClure RJ, Watson WL. The association of social  
19  
20 functioning, social relationships and the receipt of compensation with time to return to  
21  
22 work following unintentional injuries to Victorian workers. *J Occup Rehabil*  
23  
24 2012;22(3):363-75.  
25  
26 28. Baker SP, O'Neill B. The injury severity score: an update. *The Journal of trauma*  
27  
28 1976;16(11):882-5.  
29  
30 29. Teasdale G, Jennett B. Assessment of coma and impaired consciousness. A practical scale.  
31  
32 *Lancet* 1974;2(7872):81-4.  
33  
34 30. Hepp U, Moergeli H, Buchi S, Wittmann L, Schnyder U. Coping with serious accidental  
35  
36 injury: a one-year follow-up study. *Psychother Psychosom* 2005;74(6):379-86.  
37  
38 31. Horowitz M, Wilner N, Alvarez W. Impact of Event Scale: a measure of subjective stress.  
39  
40 *Psychosom Med* 1979;41(3):209-18.  
41  
42 32. Spitzer RL, Williams JB, Kroenke K, Linzer M, deGruy FV, 3rd, Hahn SR, et al. Utility  
43  
44 of a new procedure for diagnosing mental disorders in primary care. The PRIME-MD  
45  
46 1000 study. *Jama* 1994;272(22):1749-56.  
47  
48 33. Sundin EC, Horowitz MJ. Horowitz's Impact of Event Scale evaluation of 20 years of use.  
49  
50  
51  
52  
53  
54  
55  
56  
57  
58  
59  
60

- 1  
2  
3  
4  
5  
6 34. Schnyder U, Wittmann L, Friedrich-Perez J, Hepp U, Moergeli H. Posttraumatic stress  
7 disorder following accidental injury: rule or exception in Switzerland? *Psychother*  
8 *Psychosom* 2008;77(2):111-8.  
9  
10  
11  
12 35. MacEachen E, Clarke J, Franche RL, Irvin E. Systematic review of the qualitative  
13 literature on return to work after injury. *Scand J Work Environ Health* 2006;32(4):257-  
14 69.  
15  
16  
17  
18 36. Post RB, van der Sluis CK, Ten Duis HJ. Return to work and quality of life in severely  
19 injured patients. *Disability and rehabilitation* 2006;28(22):1399-404.  
20  
21  
22  
23 37. Lazarus RS. Coping theory and research: past, present, and future. *Psychosom Med*  
24 1993;55(3):234-47.  
25  
26  
27  
28 38. Lazarus RS, Folkman S. *Stress, Appraisal and Coping*. New York: Springer, 1984.  
29  
30  
31  
32  
33  
34  
35  
36  
37  
38  
39  
40  
41  
42  
43  
44  
45  
46  
47  
48  
49  
50  
51  
52  
53  
54  
55  
56  
57  
58  
59  
60

1  
2  
3  
4  
5  
6 Figure captions  
7  
8  
9

10 Figure 1

11  
12 Sick-leave days of accident victims depending on appraisals of injury severity and coping abilities

13  
14 (N=221, n=31 to 78 per group). Comparison of the group „lower appraisal of injury severity and

15  
16 higher appraisal of coping abilities” with the three other groups: \*\*\*  $p \leq .001$ .  
17  
18  
19  
20  
21  
22  
23  
24  
25  
26  
27  
28  
29  
30  
31  
32  
33  
34  
35  
36  
37  
38  
39  
40  
41  
42  
43  
44  
45  
46  
47  
48  
49  
50  
51  
52  
53  
54  
55  
56  
57  
58  
59  
60



**Table 1| Socio-demographic characteristics of injured accident victims (N=221)**

| Variable                                    | No          | Percentage |
|---------------------------------------------|-------------|------------|
| Age (years)*                                | 40.0 (12.1) |            |
| Sex:                                        |             |            |
| Male                                        | 156         | 70.6       |
| Marital status:                             |             |            |
| Single                                      | 103         | 46.6       |
| Married                                     | 87          | 39.4       |
| Divorced/widowed                            | 31          | 14.0       |
| Living arrangements:                        |             |            |
| Alone                                       | 65          | 29.4       |
| With others (family, partner, friends)      | 156         | 70.6       |
| Maximum educational level:                  |             |            |
| No education                                | 2           | 0.9        |
| Obligatory school                           | 33          | 14.9       |
| Apprenticeship                              | 121         | 54.8       |
| College                                     | 13          | 5.9        |
| Technical or commercial college/University  | 52          | 23.5       |
| Employment status:                          |             |            |
| Paid work (full-time)                       | 159         | 71.9       |
| Paid work (part-time)                       | 37          | 16.7       |
| In education/ student (part-time paid work) | 21          | 9.5        |
| Unemployed at time of accident              | 4           | 1.8        |

1  
2  
3  
4  
5  
6  
7  
8  
9  
10  
11  
12  
13  
14  
15  
16  
17  
18  
19  
20  
21  
22  
23  
24  
25  
26  
27  
28  
29  
30  
31  
32  
33  
34  
35  
36  
37  
38  
39  
40  
41  
42  
43  
44  
45  
46  
47  
48  
49  
50  
51  
52  
53  
54  
55  
56  
57  
58  
59  
60

|                          |     |      |
|--------------------------|-----|------|
| Nationality              |     |      |
| Swiss                    | 163 | 73.8 |
| German/ Austrian         | 16  | 7.2  |
| South European countries | 24  | 10.9 |
| Balkanian countries      | 14  | 6.3  |
| Others                   | 4   | 1.8  |
| Language                 |     |      |
| Non German               | 31  | 14.5 |

---

\*Mean (standard deviation)

For peer review only

Table 2| Injury related characteristics of injured accident victims (N=221)

| Variable                                                                                | Mean | Standard<br>Deviation | Minimum | Maximum |
|-----------------------------------------------------------------------------------------|------|-----------------------|---------|---------|
| Injury Severity Score                                                                   | 12.1 | 10.1                  | 1       | 66      |
| Glasgow Coma Scale                                                                      | 14.8 | 0.7                   | 9       | 15      |
| Length of stay (days) at the<br>intensive care unit*                                    | 4.0  | 3.7                   | 1       | 19      |
| Length of stay (days) at the<br>University Hospital <sup>†‡</sup>                       | 15.8 | 16.9                  | 2       | 110     |
| Length of stay (days) at the<br>University Hospital and<br>Rehabilitation <sup>†‡</sup> | 23.1 | 28.8                  | 2       | 163     |
| Time off work at T2 <sup>‡</sup>                                                        | 95.7 | 58.1                  | 6       | 183     |

\*n=41 cases at the intensive care unit

<sup>†</sup> n=220

<sup>‡</sup>Subsumes the row above it

**Table 3| Bivariate correlations (Pearson correlation coefficients) between potential predictor variables (assessed 3-28 days after the accident) to each other and to the dependent variable time off work due to the unintentional injury (assessed 6 months after the accident) (N=221).**

| Variable | TOW      | ISS     | Sex*     | Age      | TRAFF    | WORK     | SPORT | IESIN   | AAS     |
|----------|----------|---------|----------|----------|----------|----------|-------|---------|---------|
| ISS      | 0.35***  |         |          |          |          |          |       |         |         |
| Sex      | -0.08    | -0.17*  |          |          |          |          |       |         |         |
| Age      | 0.09     | -0.19** | 0.09     |          |          |          |       |         |         |
| TRAFF    | -0.01    | 0.27*** | 0.01     | -0.22*** |          |          |       |         |         |
| WORK     | 0.23***  | 0.01    | -0.23*** | 0.16*    | -0.21**  |          |       |         |         |
| SPORT    | -0.28*** | -0.21** | 0.04     | -0.06    | -0.26*** | -0.23*** |       |         |         |
| IESIN    | 0.21**   | 0.23*** | 0.11     | 0.03     | 0.10     | -0.08    | -0.04 |         |         |
| AAS      | 0.40***  | 0.34*** | -0.06    | -0.02    | 0.12     | 0.13     | -0.13 | 0.27*** |         |
| ACA      | -0.29*** | -0.08   | -0.01    | -0.01    | -0.01    | -0.09    | 0.06  | -0.15*  | -0.19** |

TOW=time off work (days) due to the unintentional injury; ISS=Injury Severity Score; TRAFF=traffic accident; SPORT=sports or leisure accident; WORK=workplace accident; IESIN=Impact of Event Scale–intrusion subscale; AAS=appraisal of accident severity; ACA=appraisal of coping abilities.

\*Sex: 1=male, 2=female

Return to work 32

\* $p \leq 0.05$ , \*\* $p \leq 0.01$ , \*\*\* $p \leq 0.001$

For peer review only

1  
2  
3  
4  
5  
6  
7  
8  
9  
10  
11  
12  
13  
14  
15  
16  
17  
18  
19  
20  
21  
22  
23  
24  
25  
26  
27  
28  
29  
30  
31  
32  
33  
34  
35  
36  
37  
38  
39  
40  
41  
42  
43  
44  
45  
46  
47  
48  
49

**Table 4| Prediction of time off work over 6 months after the accident**

| Predictor variable             | Beta | 95%-CI for Beta |       | p     |
|--------------------------------|------|-----------------|-------|-------|
| Injury Severity Score          | .25  | 0.12            | 0.37  | <.001 |
| Female gender                  | -.01 | -0.13           | 0.11  | .893  |
| Age                            | .09  | -0.03           | 0.21  | .140  |
| Type of accident:              |      |                 |       |       |
| Traffic                        | -.12 | -0.24           | 0.01  | .062  |
| Workplace                      | .10  | -0.02           | 0.23  | .112  |
| Sports/leisure                 | -.18 | -0.31           | -0.06 | .003  |
| IES intrusion subscale         | .07  | -0.05           | 0.19  | .261  |
| Appraisal of accident severity | .24  | 0.12            | 0.36  | <.001 |
| Appraisal of coping abilities  | -.19 | -0.31           | -0.08 | .001  |

Multiple Regression: N=221; R=0.58; R<sup>2</sup>=0.34; F=11.93, df=9, 211; P<0.001.

Figure 1

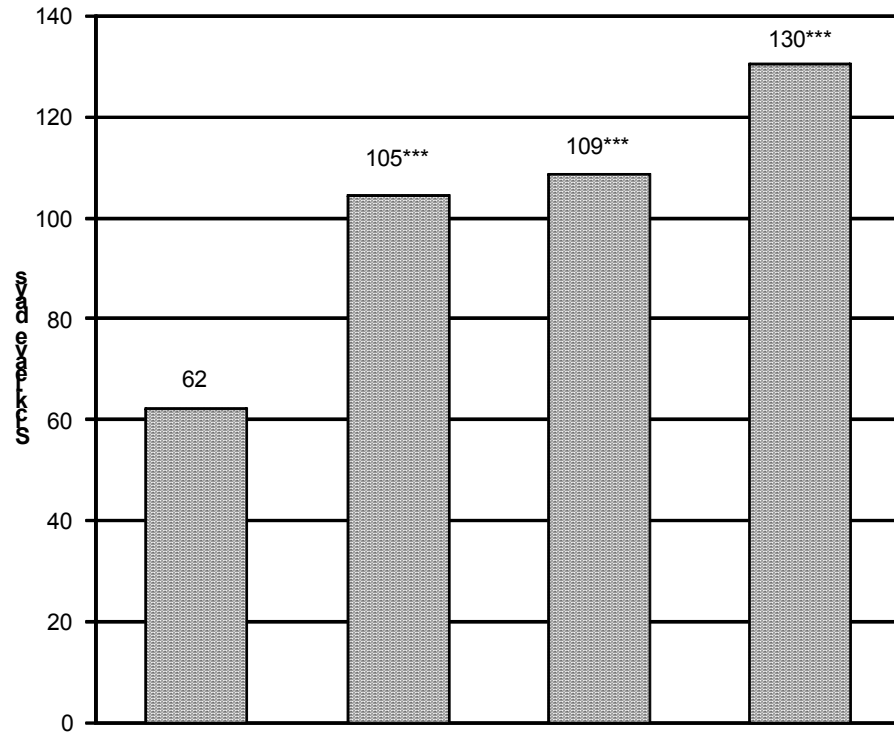

|                                               |        |        |       |        |
|-----------------------------------------------|--------|--------|-------|--------|
| <b>Initial appraisal of accident severity</b> | Lower  | Higher | Lower | Higher |
| <b>Initial appraisal of coping abilities</b>  | Higher | Higher | Lower | Lower  |

only

1  
2  
3  
4  
5  
6  
7  
8  
9  
10  
11  
12  
13  
14  
15  
16  
17  
18  
19  
20  
21  
22  
23  
24  
25  
26  
27  
28  
29  
30  
31  
32  
33  
34  
35  
36  
37  
38  
39  
40  
41  
42  
43  
44  
45  
46  
47  
48  
49  
50  
51  
52  
53  
54  
55  
56  
57  
58  
59  
60

1  
2  
3  
4  
5  
6  
7  
8 | **Return to work following ~~accidental~~unintentional injury: a prospective follow-up study**  
9  
10  
11  
12  
13

14 Urs Hepp, Ulrich Schnyder, Sofia Hepp-Beg, Josefina Friedrich-Perez, Niklaus Stulz,  
15 Hanspeter Moergeli  
16  
17  
18  
19  
20  
21

22 Outpatient Department, Psychiatric Services Aargau (Teaching Hospital of the University of  
23 Zurich), CH-5201 Brugg, Switzerland Urs Hepp head of department  
24 Department of Psychiatry and Psychotherapy, University Hospital Zurich, CH-8091 Zurich,  
25 Switzerland Ulrich Schnyder head of department  
26 Private Practice, CH-8032 Zurich, Switzerland Sofia Hepp-Beg private practitioner  
27 Hospital Männedorf AG, CH-8708 Männedorf, Switzerland Josefina Friedrich-Perez senior  
28 physician  
29 Outpatient Department, Psychiatric Services Aargau (Teaching Hospital of the University of  
30 Zurich), CH-5201 Baden, Switzerland Niklaus Stulz research associate  
31 Department of Psychiatry and Psychotherapy, University Hospital Zurich, CH-8091 Zurich,  
32 Switzerland Hanspeter Moergeli senior researcher  
33  
34  
35  
36  
37  
38  
39  
40  
41  
42  
43  
44  
45  
46  
47  
48  
49  
50  
51  
52  
53  
54  
55  
56  
57  
58  
59  
60

Correspondence to: U Hepp [urs.hepp@pdag.ch](mailto:urs.hepp@pdag.ch)

Word count: 4029



## Abstract

### Objective

The aim of this study was to predict return to work following ~~accidental-unintentional~~ injuries due to accidents leading to hospital admission.

### Design

Prospective 6 months follow-up study.

### Setting

Department of trauma surgery of a university hospital.

### Participants

Consecutively recruited victims of ~~unintentionalaccidental~~ injuries (n=221) hospitalised for a minimum of 32 hours including two consecutive nights. All participants were aged 18-65 years and able to participate in an assessment within 30 days of the accident.

### Main outcome measures

Interview-assessed number of days off work during the 6 months immediately following the ~~accidental~~ injury.

### Results

The patients' subjective appraisals of a) accident severity and b) their ability to cope with the resulting injury and its job-related consequences predicted time off work following the accident beyond the impact of the objective severity of their injury and the type of accident involved.

### Conclusions

Patients' subjective appraisals of the accident severity and of their ability to cope with its consequences are highly relevant for return to work after accidents. Extending findings from

1  
2  
3  
4  
5  
6  
7  
8  
9  
10  
11  
12  
13  
14  
15  
16  
17  
18  
19  
20  
21  
22  
23  
24  
25  
26  
27  
28  
29  
30  
31  
32  
33  
34  
35  
36  
37  
38  
39  
40  
41  
42  
43  
44  
45  
46  
47  
48  
49  
50  
51  
52  
53  
54  
55  
56  
57  
58  
59  
60

previous studies in severely injured and otherwise pre-selected accident victims, this seems to apply to the whole spectrum of patients hospitalised with unintentional~~accidental~~ injuries.

For peer review only

## Article summary

### Strengths and limitations of the study

- The application of very few exclusion criteria may have strengthened the study's external validity (generalisability), but at the same time may have limited its internal validity (i.e., factors other than the unintentional, accident-related ~~accidental~~ injury might have influenced time off work).
- There were 68 (23.5%) drop-outs from baseline to follow-up, which however did not differ from the completers with respect to available patient and accident-related characteristics.
- Sick leave after unintentional injuries due to accidents was assessed in terms of time off work during the follow-up period, which provided a more accurate estimation of work-related consequences of accidents than the mere assessment whether the accident victim had returned to work or not at a particular point in time.
- However, tThe number of days off work was assessed by means of self-~~rating~~ reports by the patients due to strict data privacy protection laws in Switzerland.

## Introduction

In the EU every year 6.5 million people are admitted to hospitals following unintentional/accidental (involuntary) injuries due to accidents.<sup>1</sup> This figure corresponds to more than 1% of the 500 million inhabitants in the EU. In addition to the direct costs of the treatment, unintentional/accidental injuries cause even higher indirect costs. Sick-leave following unintentional/accidental injuries is one of the most important contributors to these indirect costs.<sup>2,3</sup> ~~Although r~~Return to work is one of the most relevant measures of functional outcome of injuries,<sup>4</sup> and there is a growing body of literature on return to work after chronic injuries such as low-back pain.<sup>5</sup> However, there are still relatively few studies on return to work after unintentional/accidental injuries have been conducted due to accidents.<sup>2,6-14</sup>

Generally, return to work is not only predicted by injury related or medical factors. Job related factors,<sup>2,12,15,16</sup> socioeconomic factors,<sup>2,7,9,12,17</sup> psychological distress,<sup>9,11,12</sup> causal attribution,<sup>18</sup> and compensation eligibility<sup>10,19</sup> become increasingly important factors for return to work the longer the medical condition lasts. How patients' expectations of recovery affect their health and vocational outcome is insufficiently researched.<sup>20,21</sup> Compared to those remaining on sick-leave, patients returning to work after injury had stronger internal health beliefs, i.e. they believed they had an influence on their own health and considered themselves powerful.<sup>7</sup> In several studies involving various medical conditions, patients' own expectations and predictions of their future work ability predicted return to work.<sup>22-24</sup> There are relatively few studies examining the role of the subjectively experienced accident severity and the subjectively experienced ability to cope with the unintentional/accidental injury regarding return to work.<sup>7-9,13,25</sup> The findings from these studies cannot be generalised as they are compromised by their highly selective samples: the studies were either restricted to severely

1  
2  
3  
4  
5  
6 injured patients without pre-existing mental disorders,<sup>7 8 13 26</sup> and/or they excluded foreign-  
7  
8 language patients.<sup>7 8 12 13 19 26 27</sup> In a previous study of severely injured accident victims we  
9  
10 found that time off work was best predicted by the patients' own appraisals of accident  
11  
12 severity and by the patients' own expectations regarding their ability to cope with the  
13  
14 unintentional/accidental injury and its job-related consequences.<sup>13</sup> Whereas at the one-year  
15  
16 follow-up, injury severity measured by the injury severity score (ISS)<sup>28</sup> and type of accident  
17  
18 (traffic, workplace, sporting/leisure) were also predictive of time off work,<sup>8</sup> at the three-years  
19  
20 follow-up only the self-reported appraisals of accident severity and the patients' ability to  
21  
22 cope with the unintentional/accidental injury remained predictive of days absent from the  
23  
24 workplace.<sup>13</sup> However, the sample in this previous study was highly selective. We included  
25  
26 only severely injured (ISS $\geq$ 10), German-speaking patients and excluded patients who had  
27  
28 been under treatment for any mental disorders and/or serious somatic illnesses at the time of  
29  
30 the accident. By doing this we may have excluded patients at a higher risk for sick-leave and  
31  
32 the results may therefore not be generalised to apply to all accident survivors.  
33  
34  
35  
36  
37  
38

39 The aim of this study was to predict return to work following unintentional, accident-related  
40  
41 injuries in an independent, larger and less selective sample of patients with any unintentional  
42  
43 injury requiring hospital admission. ~~The aim of this study was to determine whether the~~  
44  
45 ~~predictive value of the patients' own appraisals of the severity of their accident and of their~~  
46  
47  ~~coping abilities may be replicated in a larger and less selective sample of patients with any~~  
48  
49 ~~accidental injury requiring hospital admission.~~  
50  
51  
52  
53  
54  
55  
56  
57  
58  
59  
60

## Methods

### Sample

Participants were recruited from the Department of Trauma Surgery at the Zurich University Hospital. All the patients qualifying for the study had sustained ~~accidental~~unintentional injuries that required hospitalisation for a minimum of 32 hours including two consecutive nights (the latter guaranteed exclusion of patients who were treated in the emergency room overnight but who were not really hospitalised on a ward of the Department of Trauma Surgery). Further inclusion criteria were: age between 18 to 65 years; ability to participate in an extensive assessment within 30 days of the accident; and sufficient proficiency in one of the study languages (German, Italian, Spanish, Portuguese, Serbo-Croatian, Turkish, or Albanian) to participate in the interview and to complete the self-report questionnaires. Non-German speaking participants were assessed using interpreters and professionally translated psychometric instruments. Exclusion criteria were: a Glasgow Coma Scale score (GCS)<sup>29</sup> below 9; unconsciousness for more than 15 minutes after the accident; pathological findings in the cranial CT; attempted suicide.

In contrast to our previous study,<sup>8 13</sup> neither serious somatic illness, nor being in treatment for a mental disorder prior to the accident was an exclusion criterion in the present study.<sup>30</sup> Note that the sample of the previous study<sup>8 13</sup> and the sample of the present study on time off work were completely independent from each other (recruitment of the second sample started 18 months after the end of recruitment for the first sample). With regard to the possibility of generalising the present study's findings, we also retained patients for the present study who showed marked clinical signs or symptoms of mental disorders that were obviously unrelated to the unintentional~~accidental~~ injury.

1  
2  
3  
4  
5  
6  
7  
8 Patients were recruited over a period of 12 months. During this time period 787 patients aged  
9  
10 between 18 and 65 years were admitted with unintentional~~accidental~~ injuries. Of these  
11  
12 patients 253 did not meet the inclusion criteria due to early discharge (104; 41.1%), poor  
13  
14 clinical condition (74; 29.2%), GCS score below 9 (46; 18.2%), insufficient proficiency in  
15  
16 one of the study languages (21; 8.3%) or other reasons (29; 11.5%) (multiple reasons  
17  
18 possible). As a result, 534 patients fulfilled all criteria and were eligible for the study. Due to  
19  
20 a restricted interviewing capacity, not all the eligible patients could be assessed. ~~A random~~The  
21  
22 following procedure was applied to ensure the recruitment of a representative sample and to  
23  
24 control for potential bias attributable to the time of admission~~to select the patients~~: on day 1,  
25  
26 every other consecutive patient (i.e. patient 1, 3, 5, etc.) was interviewed. On day 2 the order  
27  
28 of the list of admissions was reversed so that the last patient admitted was interviewed first,  
29  
30 the third last patient was interviewed second and so forth. On day 3, the order was reversed  
31  
32 again, etc. The 148 patients who could not be contacted due to our limited interviewing  
33  
34 capacity did not differ from the participating patients with regard to age (mean difference=  
35  
36 0.40 years; 95%-CI=-2.93 to 2.12; t=-0.31; df=481; P=0.754) and gender (Pearson's  $\chi^2=0.77$ ,  
37  
38 df=1, P=0.375). Of the 386 patients who were contacted, 335 gave their written consent to  
39  
40 participate. The 51 (13.2%) who declined participation did not differ significantly from the  
41  
42 participating patients with regard to age (mean difference=3.75 years; 95%-CI=-0.12 to 7.61;  
43  
44 t=-1.91; df=384; P=0.057) and gender (Pearson's  $\chi^2=0.07$ ; df=1; P=0.792).

45  
46  
47  
48  
49  
50  
51  
52 After the exclusion of a small number of victims of physical violence (n=12), the sample  
53  
54 consisted of 323 patients who all attended the interview at T1. On average the T1 interview  
55  
56 was performed 5 days after the referral to the hospital (SD 4.2 days; range: 2 to 28 days). 34  
57  
58  
59  
60

1  
2  
3  
4  
5  
6 patients had no regular work and were excluded from further analyses regarding time off  
7  
8 work. However, four patients who were receiving unemployment compensation at the time of  
9  
10 the accident were retained for further analyses. For these patients accident-related time off  
11  
12 work was traceable since they needed a doctor's certificate to continue to be eligible for  
13  
14 unemployment compensation. In all, valid data regarding time off work were obtainable from  
15  
16 289 patients.  
17  
18  
19  
20

21 On average the follow-up interview (T2) took place 188 (SD 16.2; range 155 to 257) days  
22  
23 after the unintentionalaccidental injury. 68 (23.5%) dropped out during the follow-up period;  
24  
25 these 68 drop-outs did not differ significantly from the final sample with regard to age (mean  
26  
27 difference=-2.78 years; 95%-CI=-6.13 to 0.57; t=-1.63; df=287; P=0.104), gender (Pearson's  
28  
29  $\chi^2=3.3$ ; df=1; P=0.069), type of accident (Pearson's  $\chi^2=6.5$ ; df=1; P=0.088), clinician-rated  
30  
31 Injury Severity Score<sup>28</sup> (mean difference=-0.77; 95%-CI=-3.54 to 1.99; t=-0.55; df=287;  
32  
33 P=0.582), and patient-rated subjective accident severity (t=1.19; df=287; P=0.237), appraisal  
34  
35 of coping abilities (mean difference=-0.16; 95%-CI=-0.37 to 0.04; t=-1.58; df=283; P=0.115),  
36  
37 and intrusions as measured by the Impact of Event Scale<sup>31</sup> (mean difference=0.87; 95%-CI=-  
38  
39 1.14 to 2.28; t=0.86; df=276; P=0.393). The final sample consisted of 221 patients.  
40  
41  
42  
43  
44

#### 45 Measures

46  
47 The Injury Severity Score (ISS)<sup>28</sup> and the Glasgow Coma Scale (GCS)<sup>29</sup> were routinely  
48  
49 assessed by the surgeons immediately after admission to the emergency room. The ISS  
50  
51 permits an evaluation of the severity of injuries by a trauma surgeon: Each part or area of the  
52  
53 body affected is given a score (1=minimum to 6=fatal injury). If the score is 6 in one area, the  
54  
55 ISS is assigned a sum score of 75. Otherwise, the scores for the three most severely injured  
56  
57  
58  
59  
60



1  
2  
3  
4  
5  
6 areas of the body are squared and then summed, producing a maximum score of 75. Patients  
7  
8 with a score of 10 or more are generally considered severely injured. The GCS is an observer-  
9  
10 rated scale for the clinical appraisal of the gravity of coma after injury to the skull and brain.  
11  
12 Patients with severe traumatic brain injuries generally have a score under 9.

13  
14  
15  
16  
17 The semi-structured interview at T1 covered socio-demographic data, a detailed work record  
18  
19 and information about the accident. Existing pre-accident psychiatric disorders were assessed  
20  
21 using the Primary Care Evaluation of Mental Disorders.<sup>32</sup> The patients rated their appraisal of  
22  
23 the injury severity on a Likert scale ranging from “1=very slight” to “5=very severe”. They  
24  
25 also rated their ability to cope with the unintentional~~accidental~~ injury and its job-related  
26  
27 consequences on a Likert scale ranging from “1=very poor” to “5=very good”.<sup>8 13</sup>

28  
29  
30 Posttraumatic psychological symptoms were assessed by the Impact of Event Scale (IES),<sup>31</sup> a  
31  
32 15 item self-rating questionnaire comprising two subscales (intrusion and avoidance) with  
33  
34 high reliability and validity.<sup>33</sup> Time off work, assessed at 6 months (T2) post-accident, was  
35  
36 defined as the patient-reported number of sick-leave days attributable to the  
37  
38 unintentional~~accidental~~ injury and its consequences including time of hospitalisation. To  
39  
40 record their sick-leave days the patients used a specified journal they received at T1. A week  
41  
42 off work was set to equal seven days of leave. Where subjects who had previously been full-  
43  
44 time employees returned to work on a part-time basis, the days on which they worked less  
45  
46 were added to the total days of leave on a pro rata basis.<sup>13</sup> The interviews were performed by  
47  
48 two medical doctors (SHB and JFP). Each patient was interviewed by the same interviewer at  
49  
50 T1 and T2. Detailed information on the study design and the interrater reliability is described  
51  
52 in an earlier publication on the incidence of PTSD in that sample.<sup>34</sup>  
53  
54  
55  
56  
57  
58  
59  
60

### Statistical analysis

Hierarchical linear multiple regression analyses were performed to predict the number of sick-leave days. They allowed for highlighting the relevance of patient's appraisal among the selected potential predictor variables. To enable us to enter the type of accident (road traffic, workplace, household, or leisure-time accidents) as a predictor into the multiple regression analysis, this categorical variable was converted into a set of three new variables so that a deviation contrast resulted. In this way the effect of each accident category was compared to the mean effect of all accident categories. Since there was one new variable for each degree of freedom, one accident category (household) had to be omitted in the regression analysis. In the final regression model including all potential predictors multi-collinearity was low (tolerance >0.75) and the distribution of regression standardised residuals was normal (Kolmogorov-Smirnov  $Z=0.63$ ,  $P=0.827$ ). Group comparisons of dimensional variables were performed with t-tests.

### Ethical approval

Ethical approval was granted by the Ethics Committee of the Canton of Zurich. Written informed consent was obtained from all participants.

## Results

The socio-demographic characteristics are presented in table 1. 35 (15.8%) of the 221 patients suffered from one or multiple pre-existing mental disorders immediately prior to the accident, and 31 patients (14.0%) did not speak German. Characteristics related to the unintentional/accidental injury of the 221 patients are found in table 2. The types of accident were as follows: 72 (32.6%) traffic accidents, 66 (29.9%) workplace accidents, 6 (2.7%) household accidents, and 77 (34.8%) sports/leisure activity-related accidents. The mean ISS differed significantly between the types of accident (traffic: M 16.0, SD 12.4; workplace or household: M 11.8, SD 8.2; sporting/leisure activity: M 8.7, SD 7.7; ANOVA:  $F=10.7$ ;  $df=2$ , 218;  $P<0.001$ ).

According to the surgeons' files, 44 (19.9%) patients sustained a mild or moderate traumatic brain injury (MTBI). 41 (18.6%) patients were first referred to the intensive care unit (ICU), with a mean duration of ICU stay of 4.0 days (SD 3.7; range 1-19). The mean length of stay at the acute hospital including the ICU was 15.8 days (SD 16.9; range 2-110). 46 patients had a further stay in a rehabilitation hospital, with a mean length of stay of 35.0 days (SD 25.0; range 3-141). The mean number of sick-leave days was 95.7 (SD 58.1; range 6-183). Patients suffering from pre-existing mental disorders did not differ significantly from the rest of the sample with regard to the number of sick-leave days (mean difference=2.7 days; 95%-CI=-18.4 to 23.8;  $t=0.25$ ;  $df=219$ ;  $P=0.801$ ).

Bivariate correlations of all variables included in the regression analyses are presented in table 3. The objective injury severity (ISS) and the patients' subjective appraisals of the accident

1  
2  
3  
4  
5  
6 severity were positively correlated. Subjective appraisals of the accident severity (but not the  
7  
8 objective injury severity scores) were negatively related with self-rated coping abilities.

9  
10 Time off work was significantly correlated with the injury severity (ISS), IES intrusion scores,  
11  
12 and the patients' own appraisals of both their injury severity and their coping abilities. Finally,  
13  
14 time off work was longer after workplace related accidents and shorter after sports/leisure  
15  
16 accidents.  
17

18  
19  
20  
21 In a simultaneous regression analysis the variables injury severity (ISS), sex, age, type of  
22  
23 accident (road traffic, workplace, or leisure-time accidents), and IES intrusion were entered as  
24  
25 potential predictors of time off work. Combined, these predictors explained 24.3% of the  
26  
27 variance of time off work ( $F=9.75$ ;  $df=7, 213$ ;  $P<0.001$ ). When in a series of hierarchical  
28  
29 regressions each of these predictors was examined when added last to this first set, ISS (8.3%,  
30  
31  $F=23.38$ ;  $df=1, 213$ ;  $P<0.001$ ), type of accident (7.6%;  $F$  change= $7.14$ ;  $df=3, 213$ ;  $P<0.001$ ),  
32  
33 and IES intrusion added unique variance (2.0%;  $F=5.63$ ;  $df=1, 213$ ;  $P=0.019$ ). These five  
34  
35 variables were then treated as the first set added in hierarchical regressions focusing on two  
36  
37 additional predictors, patients' appraisals of accident severity and of their coping abilities.  
38  
39 These two variables were entered in the second step accounting for an additional 9.4% of the  
40  
41 variance of the time off work 6 months post accident ( $F$  change= $15.04$ ;  $df=2, 211$ ;  $P<0.001$ ).  
42  
43 Self-reported appraisal of accident severity added 6.0% ( $F$  change= $18.14$ ;  $df=1, 212$ ,  
44  
45  $P<0.001$ ), and self reported appraisal of their coping abilities added 4.7% ( $F$  change= $14.17$ ;  
46  
47  $df=1, 212$ ;  $P<0.001$ ). Finally, each of the seven predictors in table 4 was evaluated for unique  
48  
49 variance contributed with the other six predictors already in the model. The severity of the  
50  
51 injury (ISS), type of accident, and the two appraisals variables remained significant, whereas  
52  
53  
54  
55  
56  
57  
58  
59  
60

1  
2  
3  
4  
5  
6 age, gender, and IES intrusion did not contribute significantly to the prediction of time off  
7  
8 work.  
9

10  
11  
12 In order to visualize the effects of appraisals on sick-leave days, the sample was divided into  
13  
14 four groups based on median-splits in the two variables appraisal of accident severity and  
15  
16 appraisal of coping abilities (fig. 1). The median was 4 Likert points in the subjective accident  
17  
18 severity scale, and 5 Likert points in the self-rated coping abilities scale. Patients with values  
19  
20 equal or higher than the median were grouped as 'higher' in the respective characteristic,  
21  
22 patients with values lower than the median were grouped as 'lower' concerning subjective  
23  
24 injury severity or self-rated coping abilities, respectively. Regarding the two groups of  
25  
26 particular interest, namely patients who assessed the accident severity as higher and their  
27  
28 coping abilities as lower, compared with patients who estimated the accident severity as lower  
29  
30 and their coping abilities as higher, there were twice as many sick-leave days for the former  
31  
32 group (mean difference=-68.1 days; 95%-CI=-85.7 to -50.5;  $t=-7.67$ ;  $df=124$ ;  $P<0.001$ ).  
33  
34  
35  
36  
37  
38  
39  
40  
41  
42  
43  
44  
45  
46  
47  
48  
49  
50  
51  
52  
53  
54  
55  
56  
57  
58  
59  
60

## Discussion

How patients perceive the severity of their accident and their ability to cope with the resulting injury and its job-related consequences are crucial predictors for return to work after unintentional/accidental injuries which lead to hospital admission. The current study demonstrated that the patients' own appraisals of the severity of their accident and of their coping resources predict time off work after accidents leading to hospital admission beyond the impact of the objective injury severity (ISS).

Some limitations of this study have to be addressed. To enable the findings from this current study to be better generalised to all hospitalised accident victims, we applied very few exclusion criteria. For example, we did not exclude patients with pre-existing somatic and psychiatric morbidity or non-ICU patients. While this may have strengthened the external validity of our findings, factors other than the unintentional/accidental injury might have influenced outcomes. By including patients with pre-existing somatic and psychiatric morbidity we possibly included patients who were at higher risk for sick-leave following unintentional/accidental injury. However, patients suffering from pre-existing mental disorders did not differ from other patients with regard to the number of sick-leave days. The inclusion criterion of being hospitalised for at least 32 hours including two consecutive nights may limit the generalisability of the study's findings, but guaranteed that all patients in the sample were really hospitalised and not only received an overnight treatment in the emergency room (which formally is an instance of hospitalisation but in fact is an outpatient treatment). Another factor that may affect return to work is compensation eligibility.<sup>10 19</sup> In Switzerland all inhabitants receive compensation in the case of work incapacity or disability independent of the type of accident. For employees there is a mandatory accident insurance that covers

1  
2  
3  
4  
5  
6 both work- and non-work-related injuries due to accidents Thus, it is unlikely that different  
7 compensation rules related to different types of accidents biased our results. Nevertheless, the  
8 very generous compensation system in Switzerland may limit the generalisability of our  
9 findings to other countries with other or less generous compensation systems. Furthermore,  
10 there were 68 (23.5%) drop-outs from T1 to T2 in our study. It is unlikely that these drop-outs  
11 affected the results substantially as they did not differ significantly from the final sample.  
12  
13 Finally, the number of days off work was assessed by means of self-reporting by the  
14 patients. Strict data privacy protection laws in Switzerland prevent the use of health insurance  
15 companies' data for the purpose of research projects. Such data would have been more  
16 reliable.  
17  
18  
19  
20  
21  
22  
23  
24  
25  
26  
27  
28  
29

30 The relevance of psychosocial and subjective factors for a successful return to work after  
31 accidents has been increasingly recognised in literature.<sup>7 11 20 26 27 35</sup> The total amount of  
32 explained variance in the present study was moderate ( $R^2=.34$ ) but within the range of  
33 comparable studies.<sup>8 9 12-14 26</sup> Nevertheless, this suggests that other factors than the ones we  
34 examined are also important regarding return to work. Extending the findings from previous  
35 studies among severely injured accident victims,<sup>7 8 13</sup> the current study confirmed the  
36 predictive value of patients' subjective appraisals of the accident severity for the whole  
37 spectrum of patients admitted to hospitals with unintentionalaccidental injuries. In contrast to  
38 our previous study in severely injured accident victims who were hospitalised at the ICU,<sup>8 13</sup>  
39 the completely independent sample of the current study included all unintentionalaccidental  
40 injuries leading to hospital admission, with only 18.6% of the patients requiring ICU  
41 treatment. In an effort to enable the findings from this current study to be better generalised,  
42 unlike in our previous study with another sample,<sup>8 13</sup> we did not exclude foreign language  
43  
44  
45  
46  
47  
48  
49  
50  
51  
52  
53  
54  
55  
56  
57  
58  
59  
60

1  
2  
3  
4  
5  
6 patients and patients with pre-existing somatic illnesses and mental disorders. In some cases  
7  
8 these particular patients may be less well socially integrated or have greater difficulties  
9  
10 dealing with the consequences of unintentionalaccidental injuries; both being risk factors for  
11  
12 work disability. In our heterogeneous sample including moderately injured and foreign  
13  
14 language accident victims with pre-existing somatic and psychiatric morbidity, the  
15  
16 subjectively experienced accident severity predicted time off work after the accidents to the  
17  
18 same degree as the objective injury severity (regression weights: Betas = .24 vs. .25). The role  
19  
20 of the objective injury severity regarding time off work after unintentionalaccidental injuries  
21  
22 is ambiguous. In keeping with some previous studies,<sup>2 7 8</sup> we found the more severe injuries to  
23  
24 be related to more days off work. However, some other studies could not find that  
25  
26 association.<sup>9 11 12 36</sup> These inconsistent findings might be explained by the different ranges of  
27  
28 injury severities and by the different follow-up intervals used in different studies. The wider  
29  
30 the range of injury severities in a study, the higher the chance that the severity of the physical  
31  
32 impairment predicts subsequent time off work. The more time that has elapsed since the  
33  
34 accident, the less impact the objective injury severity is expected to have on time off work.  
35  
36 The physical condition may play a more important role immediately following the accident  
37  
38 because hospitalisation and rehabilitation directly contribute to the time off work, whereas in  
39  
40 the longer term other factors might gain in importance regarding sick-leave. In our previous  
41  
42 study among severely injured accident victims, the objective injury severity predicted time off  
43  
44 work during the first year after the accident but was no longer predictive for the number of  
45  
46 days off work at the three year follow-up.<sup>8 13</sup> In a longer term perspective, factors other than  
47  
48 the objective physical impairment, e.g. psychosocial or subjective factors, might gain in  
49  
50 importance regarding return to work.  
51  
52  
53  
54  
55  
56  
57  
58  
59  
60



Concerning subjective factors predicting return to work, the patients' appraisals of the ability to cope with the unintentional~~accidental~~ injury and its job-related consequences turned out to be another important predictor of sick-leave after hospital admissions due to unintentional, ~~accidental~~ accident-related injuries. The more coping resources patients perceived themselves to have at their disposal immediately after the accident, the better his or her chances for vocational rehabilitation actually were. The significance of subjectively perceived coping abilities for return to work has already been found in earlier studies.<sup>8 12 13</sup> The predictive value of the patients' appraisals of the accident severity and of the coping abilities regarding time off work after unintentional~~accidental~~ injuries may be explained by Lazarus' theories on stress, appraisal and coping.<sup>37 38</sup> Lazarus emphasized the significance of primary and secondary appraisal of a stressful situation or event. In a primary appraisal the same situation can be judged as harmful, as a threat or as a challenge by different individuals. In a secondary appraisal the individual judges the ability to cope with the situation depending on his or her individual coping strategies. If a stressful situation is appraised as controllable by action, problem-focused coping will predominate. In a situation viewed as refractory to change, however, emotion-focused coping is more likely to predominate. Among accident victims these two steps of appraisals seem to be related. In our sample, the more threatening the patients judged their accident to have been, the fewer resources they perceived themselves to have at their disposal for coping with the unintentional~~accidental~~ injury and its job-related consequences. However, the subjective appraisal of the coping abilities was not correlated with the objective injury severity. This further emphasizes the importance of considering not only the patient's objective injury severity but also their own appraisal of the accident severity and the coping abilities when predicting the chances of return to work. Coping with stressful events is increasingly viewed as a process rather than an inert (personality) style. If coping is

1  
2  
3  
4  
5  
6  
7  
8  
9  
10  
11  
12  
13  
14  
15  
16  
17  
18  
19  
20  
21  
22  
23  
24  
25  
26  
27  
28  
29  
30  
31  
32  
33  
34  
35  
36  
37  
38  
39  
40  
41  
42  
43  
44  
45  
46  
47  
48  
49  
50  
51  
52  
53  
54  
55  
56  
57  
58  
59  
60

open to change over time in accordance with the situational context,<sup>30 37</sup> this may be promising for preventive and therapeutic interventions.

For peer review only

## Conclusion

A patient's own appraisal of the severity of their accident and of their ability to cope with the unintentionalaccidental injury and its job-related consequences, are highly relevant for return to work after accidents leading to hospital admission. Both subjective appraisals predict time off work beyond the impact of the objective injury severity in the whole spectrum of patients hospitalised due to unintentionalaccidental injuries.

In Western countries the quality of surgical care of accident victims has reached a high standard. In patients hospitalised with unintentionalaccidental injuries, even where acute surgical care is inevitable, from a less immediate standpoint and bearing in mind future rehabilitation, a patient's subjective assessment seems to gain in importance where their recovery is concerned. It appears that relevant prognostic information regarding return to work can be obtained by asking the patient two simple questions:

- 1.) How severe do you think your accident was?
- 2.) How well do you think you will be able to handle the consequences of the accident with regard to return to work?

Any comprehensive treatment following unintentionalaccidental injuries should routinely be accompanied by a brief psychosocial assessment and should include information and practical advice.

**Copyright**

The Corresponding Author has the right to grant on behalf of all authors and does grant on behalf of all authors, an exclusive licence (or non exclusive for government employees) on a worldwide basis to the BMJ Publishing Group Ltd to permit this article (if accepted) to be published in BMJ editions and any other BMJ PGL products and sublicences such use and exploit all subsidiary rights, as set out in our licence.

**Competing interests**

This study was supported by the Swiss National Science Foundation (32-053736.98). The Swiss National Science Foundation is a government-funded national institution. No commercial sponsorship was involved in the design and conduct of the study. All authors declare that they have no financial relationships with any organisation that might have an interest in the submitted work in the previous three years, and that they have no other relationships or activities that could appear to have influenced the submitted work.

**Author contributions**

US and HM designed the study. HM, SHB and JFP were involved in the data collection. HM performed the statistical analyses. UH, HM, NS, US were involved in the interpretation of the data. NS, UH and HM drafted the manuscript. US reviewed the manuscript several times. All authors have read and approved the final version of the manuscript.

**Data sharing**

There is no additional data available.

## References

1. Bauer R, Steiner M. Injuries in the European Union. Statistics Summary 2005-2007. Vienna: KfV, Austrian Road Safety Board, 2009.
2. MacKenzie EJ, Morris JA, Jr., Jurkovich GJ, Yasui Y, Cushing BM, Burgess AR, et al. Return to work following injury: the role of economic, social, and job-related factors. *Am J Public Health* 1998;88(11):1630-7.
3. Leigh JP, Markowitz SB, Fahs M, Shin C, Landrigan PJ. Occupational injury and illness in the United States. Estimates of costs, morbidity, and mortality. *Arch Intern Med* 1997;157(14):1557-68.
4. Ebel BE, Mack C, Diehr P, Rivara FP. Lost working days, productivity, and restraint use among occupants of motor vehicles that crashed in the United States. *Inj Prev* 2004;10(5):314-9.
5. Loisel P, Anema JR, editors. *Handbook of Work Disability. Prevention and Management*. New York, NY: Springer, 2013.
6. MacKenzie EJ, Shapiro S, Smith RT, Siegel JH, Moody M, Pitt A. Factors influencing return to work following hospitalization for traumatic injury. *Am J Public Health* 1987;77(3):329-34.
7. Soberg HL, Finset A, Bautz-Holter E, Sandvik L, Roise O. Return to work after severe multiple injuries: a multidimensional approach on status 1 and 2 years postinjury. *The Journal of trauma* 2007;62(2):471-81.
8. Schnyder U, Moergeli H, Klaghofer R, Sensky T, Buchi S. Does patient cognition predict time off from work after life-threatening accidents? *Am J Psychiatry* 2003;160(11):2025-31.

- 1  
2  
3  
4  
5  
6 9. Michaels AJ, Michaels CE, Moon CH, Zimmerman MA, Peterson C, Rodriguez JL.  
7  
8 Psychosocial factors limit outcomes after trauma. *The Journal of trauma*  
9  
10 1998;44(4):644-8.  
11  
12 10. Zelle BA, Panzica M, Vogt MT, Sittaro NA, Krettek C, Pape HC. Influence of workers'  
13  
14 compensation eligibility upon functional recovery 10 to 28 years after polytrauma.  
15  
16 *American journal of surgery* 2005;190(1):30-6.  
17  
18 11. Davydow DS, Zatzick DF, Rivara FP, Jurkovich GJ, Wang J, Roy-Byrne PP, et al.  
19  
20 Predictors of posttraumatic stress disorder and return to usual major activity in  
21  
22 traumatically injured intensive care unit survivors. *General hospital psychiatry*  
23  
24 2009;31(5):428-35.  
25  
26 12. Lange C, Burgmer M, Braunheim M, Heuft G. Prospective analysis of factors associated  
27  
28 with work reentry in patients with accident-related injuries. *J Occup Rehabil*  
29  
30 2007;17(1):1-10.  
31  
32 13. Hepp U, Moergeli H, Buchi S, Bruchhaus-Steinert H, Sensky T, Schnyder U. The long-  
33  
34 term prediction of return to work following serious accidental injuries: a follow up  
35  
36 study. *BMC Psychiatry* 2011;11:53.  
37  
38 14. Lilley R, Davie G, Ameratunga S, Derrett S. Factors predicting work status 3 months after  
39  
40 injury: results from the Prospective Outcomes of Injury Study. *BMJ Open*  
41  
42 2012;2(2):e000400.  
43  
44 15. Hunter SJ, Shaha S, Flint D, Tracy DM. Predicting return to work. A long-term follow-up  
45  
46 study of railroad workers after low back injuries. *Spine* 1998;23(21):2319-28.  
47  
48 16. Brewin CR, Robson MJ, Shapiro DA. Social and psychological determinants of recovery  
49  
50 from industrial injuries. *Injury* 1983;14(5):451-5.  
51  
52  
53  
54  
55  
56  
57  
58  
59  
60

- 1  
2  
3  
4  
5  
6  
7  
8  
9  
10  
11  
12  
13  
14  
15  
16  
17  
18  
19  
20  
21  
22  
23  
24  
25  
26  
27  
28  
29  
30  
31  
32  
33  
34  
35  
36  
37  
38  
39  
40  
41  
42  
43  
44  
45  
46  
47  
48  
49  
50  
51  
52  
53  
54  
55  
56  
57  
58  
59  
60
17. Andersson AL, Bunketorp O, Allebeck P. High rates of psychosocial complications after road traffic injuries. *Injury* 1997;28(8):539-43.
  18. Rusch MD, Dzwierzynski WW, Sanger JR, Pruitt NT, Siewert AD. Return to work outcomes after work-related hand trauma: the role of causal attributions. *The Journal of hand surgery* 2003;28(4):673-7.
  19. Hou WH, Sheu CF, Liang HW, Hsieh CL, Lee Y, Chuang HY, et al. Trajectories and predictors of return to work after traumatic limb injury--a 2-year follow-up study. *Scand J Work Environ Health* 2012;38(5):456-66.
  20. Mondloch MV, Cole DC, Frank JW. Does how you do depend on how you think you'll do? A systematic review of the evidence for a relation between patients' recovery expectations and health outcomes. *Cmaj* 2001;165(2):174-9.
  21. Ozegovic D, Carroll LJ, Cassidy JD. What influences positive return to work expectation? Examining associated factors in a population-based cohort of whiplash-associated disorders. *Spine (Phila Pa 1976)* 2010;35(15):E708-13.
  22. Hansen A, Edlund C, Henningsson M. Factors relevant to a return to work: a multivariate approach. *Work* 2006;26(2):179-90.
  23. Heijbel B, Josephson M, Jensen I, Stark S, Vingard E. Return to work expectation predicts work in chronic musculoskeletal and behavioral health disorders: prospective study with clinical implications. *J Occup Rehabil* 2006;16(2):173-84.
  24. Lindell O, Johansson SE, Strender LE. Predictors of stable return-to-work in non-acute, non-specific spinal pain: low total prior sick-listing, high self prediction and young age. A two-year prospective cohort study. *BMC Fam Pract* 2010;11:53.

- 1  
2  
3  
4  
5  
6 25. Lanes TC, Gauron EF, Spratt KF, Wernimont TJ, Found EM, Weinstein JN. Long-term  
7  
8 follow-up of patients with chronic back pain treated in a multidisciplinary rehabilitation  
9  
10 program. *Spine* 1995;20(7):801-6.  
11  
12 26. Toien K, Skogstad L, Ekeberg O, Myhren H, Schou Bredal I. Prevalence and predictors of  
13  
14 return to work in hospitalised trauma patients during the first year after discharge: a  
15  
16 prospective cohort study. *Injury* 2012;43(9):1606-13.  
17  
18 27. Clay FJ, Fitzharris M, Kerr E, McClure RJ, Watson WL. The association of social  
19  
20 functioning, social relationships and the receipt of compensation with time to return to  
21  
22 work following unintentional injuries to Victorian workers. *J Occup Rehabil*  
23  
24 2012;22(3):363-75.  
25  
26 28. Baker SP, O'Neill B. The injury severity score: an update. *The Journal of trauma*  
27  
28 1976;16(11):882-5.  
29  
30 29. Teasdale G, Jennett B. Assessment of coma and impaired consciousness. A practical scale.  
31  
32 *Lancet* 1974;2(7872):81-4.  
33  
34 30. Hepp U, Moergeli H, Buchi S, Wittmann L, Schnyder U. Coping with serious accidental  
35  
36 injury: a one-year follow-up study. *Psychother Psychosom* 2005;74(6):379-86.  
37  
38 31. Horowitz M, Wilner N, Alvarez W. Impact of Event Scale: a measure of subjective stress.  
39  
40 *Psychosom Med* 1979;41(3):209-18.  
41  
42 32. Spitzer RL, Williams JB, Kroenke K, Linzer M, deGruy FV, 3rd, Hahn SR, et al. Utility  
43  
44 of a new procedure for diagnosing mental disorders in primary care. The PRIME-MD  
45  
46 1000 study. *Jama* 1994;272(22):1749-56.  
47  
48 33. Sundin EC, Horowitz MJ. Horowitz's Impact of Event Scale evaluation of 20 years of use.  
49  
50  
51  
52  
53  
54  
55  
56  
57  
58  
59  
60



- 1  
2  
3  
4  
5  
6 34. Schnyder U, Wittmann L, Friedrich-Perez J, Hepp U, Moergeli H. Posttraumatic stress  
7 disorder following accidental injury: rule or exception in Switzerland? *Psychother*  
8 *Psychosom* 2008;77(2):111-8.  
9  
10  
11  
12 35. MacEachen E, Clarke J, Franche RL, Irvin E. Systematic review of the qualitative  
13 literature on return to work after injury. *Scand J Work Environ Health* 2006;32(4):257-  
14 69.  
15  
16  
17  
18 36. Post RB, van der Sluis CK, Ten Duis HJ. Return to work and quality of life in severely  
19 injured patients. *Disability and rehabilitation* 2006;28(22):1399-404.  
20  
21  
22  
23 37. Lazarus RS. Coping theory and research: past, present, and future. *Psychosom Med*  
24 1993;55(3):234-47.  
25  
26  
27  
28 38. Lazarus RS, Folkman S. *Stress, Appraisal and Coping*. New York: Springer, 1984.  
29  
30  
31  
32  
33  
34  
35  
36  
37  
38  
39  
40  
41  
42  
43  
44  
45  
46  
47  
48  
49  
50  
51  
52  
53  
54  
55  
56  
57  
58  
59  
60

1  
2  
3  
4  
5  
6 Figure captions  
7  
8  
9

10 Figure 1

11  
12 Sick-leave days of accident victims depending on appraisals of injury severity and coping abilities

13  
14 (N=221, n=31 to 78 per group). Comparison of the group „lower appraisal of injury severity and

15  
16 higher appraisal of coping abilities” with the three other groups: \*\*\*  $p \leq .001$ .  
17  
18  
19  
20  
21  
22  
23  
24  
25  
26  
27  
28  
29  
30  
31  
32  
33  
34  
35  
36  
37  
38  
39  
40  
41  
42  
43  
44  
45  
46  
47  
48  
49  
50  
51  
52  
53  
54  
55  
56  
57  
58  
59  
60

**Table 1| Socio-demographic characteristics of injured accident victims (N=221)**

| Variable                                    | No          | Percentage |
|---------------------------------------------|-------------|------------|
| Age (years)*                                | 40.0 (12.1) |            |
| Sex:                                        |             |            |
| Male                                        | 156         | 70.6       |
| Marital status:                             |             |            |
| Single                                      | 103         | 46.6       |
| Married                                     | 87          | 39.4       |
| Divorced/widowed                            | 31          | 14.0       |
| Living arrangements:                        |             |            |
| Alone                                       | 65          | 29.4       |
| With others (family, partner, friends)      | 156         | 70.6       |
| Maximum educational level:                  |             |            |
| No education                                | 2           | 0.9        |
| Obligatory school                           | 33          | 14.9       |
| Apprenticeship                              | 121         | 54.8       |
| College                                     | 13          | 5.9        |
| Technical or commercial college/University  | 52          | 23.5       |
| Employment status:                          |             |            |
| Paid work (full-time)                       | 159         | 71.9       |
| Paid work (part-time)                       | 37          | 16.7       |
| In education/ student (part-time paid work) | 21          | 9.5        |
| Unemployed at time of accident              | 4           | 1.8        |

1  
2  
3  
4  
5  
6  
7  
8  
9  
10  
11  
12  
13  
14  
15  
16  
17  
18  
19  
20  
21  
22  
23  
24  
25  
26  
27  
28  
29  
30  
31  
32  
33  
34  
35  
36  
37  
38  
39  
40  
41  
42  
43  
44  
45  
46  
47  
48  
49  
50  
51  
52  
53  
54  
55  
56  
57  
58  
59  
60

Nationality

|                          |     |      |
|--------------------------|-----|------|
| Swiss                    | 163 | 73.8 |
| German/ Austrian         | 16  | 7.2  |
| South European countries | 24  | 10.9 |
| Balkanian countries      | 14  | 6.3  |
| Others                   | 4   | 1.8  |

Language

|                   |           |             |
|-------------------|-----------|-------------|
| <u>Non German</u> | <u>31</u> | <u>14.5</u> |
|-------------------|-----------|-------------|

---

\*Mean (standard deviation)

Table 2| Injury related characteristics of injured accident victims (N=221)

| Variable                                                                                | Mean | Standard<br>Deviation | Minimum | Maximum |
|-----------------------------------------------------------------------------------------|------|-----------------------|---------|---------|
| Injury Severity Score                                                                   | 12.1 | 10.1                  | 1       | 66      |
| Glasgow Coma Scale                                                                      | 14.8 | 0.7                   | 9       | 15      |
| Length of stay (days) at the<br>intensive care unit*                                    | 4.0  | 3.7                   | 1       | 19      |
| Length of stay (days) at the<br>University Hospital <sup>†‡</sup>                       | 15.8 | 16.9                  | 2       | 110     |
| Length of stay (days) at the<br>University Hospital and<br>Rehabilitation <sup>†‡</sup> | 23.1 | 28.8                  | 2       | 163     |
| Time off work at T2 <sup>‡</sup>                                                        | 95.7 | 58.1                  | 6       | 183     |

\*n=41 cases at the intensive care unit

<sup>†</sup> n=220

<sup>‡</sup>Subsumes the row above it

**Table 3| Bivariate correlations (Pearson correlation coefficients) between potential predictor variables (assessed 3-28 days after the accident) to each other and to the dependent variable time off work due to the accidental-unintentional injury (assessed 6 months after the accident) (N=221).**

| Variable      | TOW      | ISS     | Sex*     | Age      | TRAFF    | WORK     | SPORT | IESIN   | <u>AISAAS</u> |
|---------------|----------|---------|----------|----------|----------|----------|-------|---------|---------------|
| ISS           | 0.35***  |         |          |          |          |          |       |         |               |
| Sex           | -0.08    | -0.17*  |          |          |          |          |       |         |               |
| Age           | 0.09     | -0.19** | 0.09     |          |          |          |       |         |               |
| TRAFF         | -0.01    | 0.27*** | 0.01     | -0.22*** |          |          |       |         |               |
| WORK          | 0.23***  | 0.01    | -0.23*** | 0.16*    | -0.21**  |          |       |         |               |
| SPORT         | -0.28*** | -0.21** | 0.04     | -0.06    | -0.26*** | -0.23*** |       |         |               |
| IESIN         | 0.21**   | 0.23*** | 0.11     | 0.03     | 0.10     | -0.08    | -0.04 |         |               |
| AAS           | 0.40***  | 0.34*** | -0.06    | -0.02    | 0.12     | 0.13     | -0.13 | 0.27*** |               |
| <u>ACCACA</u> | -0.29*** | -0.08   | -0.01    | -0.01    | -0.01    | -0.09    | 0.06  | -0.15*  | -0.19**       |

TOW=time off work (days) due to the accidental-unintentional injury; ISS=Injury Severity Score; TRAFF=traffic accident;

SPORT=sports or leisure accident; WORK=workplace accident; IESIN=Impact of Event Scale–intrusion subscale; AAS=appraisal of accident severity; ACA=appraisal of coping abilities.

\*Sex: 1=male, 2=female

Return to work 32

\* $p \leq 0.05$ , \*\* $p \leq 0.01$ , \*\*\* $p \leq 0.001$

For peer review only

**Table 4| Prediction of time off work over 6 months after the accident**

| Predictor variable                                                                     | Beta | 95%-CI for Beta |       | p     |
|----------------------------------------------------------------------------------------|------|-----------------|-------|-------|
| Injury Severity Score                                                                  | .25  | 0.12            | 0.37  | <.001 |
| Female gender                                                                          | -.01 | -0.13           | 0.11  | .893  |
| Age                                                                                    | .09  | -0.03           | 0.21  | .140  |
| Type of accident:                                                                      |      |                 |       |       |
| Traffic                                                                                | -.12 | -0.24           | 0.01  | .062  |
| Workplace                                                                              | .10  | -0.02           | 0.23  | .112  |
| Sports/leisure                                                                         | -.18 | -0.31           | -0.06 | .003  |
| IES intrusion subscale                                                                 | .07  | -0.05           | 0.19  | .261  |
| Appraisal of accident severity                                                         | .24  | 0.12            | 0.36  | <.001 |
| Appraisal of coping abilities                                                          | -.19 | -0.31           | -0.08 | .001  |
| Multiple Regression: N=221; R=0.58; R <sup>2</sup> =0.34; F=11.93, df=9, 211; P<0.001. |      |                 |       |       |



Figure 1

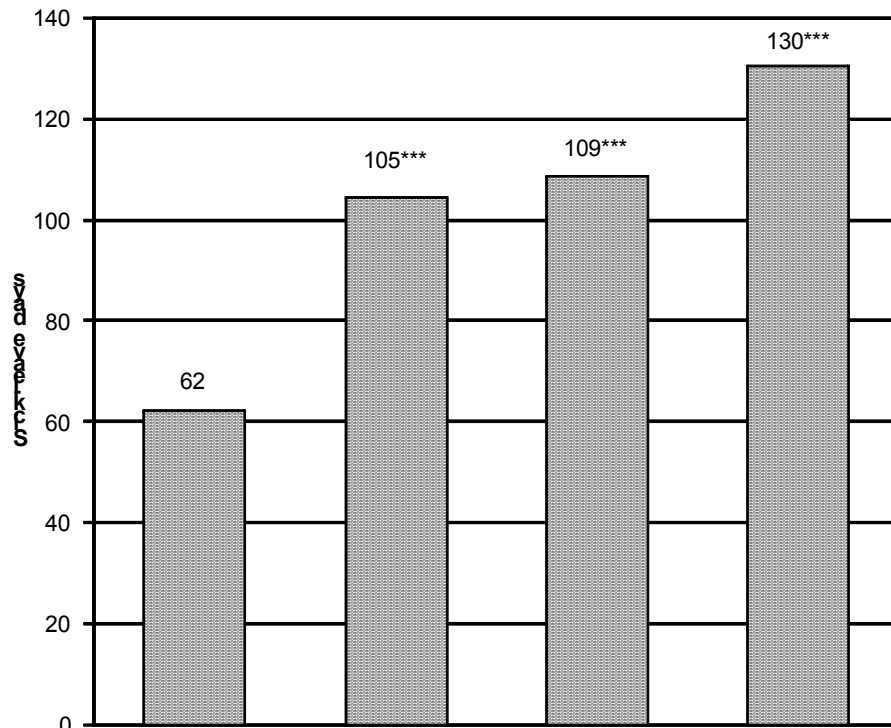

|                                               |        |        |       |        |
|-----------------------------------------------|--------|--------|-------|--------|
| <b>Initial appraisal of accident severity</b> | Lower  | Higher | Lower | Higher |
| <b>Initial appraisal of coping abilities</b>  | Higher | Higher | Lower | Lower  |

only

STROBE Statement—Checklist of items that should be included in reports of *cohort studies*

page (5)

|                              | Item No | Recommendation                                                                                                                                                                                               |         |
|------------------------------|---------|--------------------------------------------------------------------------------------------------------------------------------------------------------------------------------------------------------------|---------|
| <b>Title and abstract</b>    | 1       | (a) Indicate the study's design with a commonly used term in the title or the abstract                                                                                                                       | 1       |
|                              |         | (b) Provide in the abstract an informative and balanced summary of what was done and what was found                                                                                                          | 2       |
| <b>Introduction</b>          |         |                                                                                                                                                                                                              |         |
| Background/rationale         | 2       | Explain the scientific background and rationale for the investigation being reported                                                                                                                         | 3-4     |
| Objectives                   | 3       | State specific objectives, including any prespecified hypotheses                                                                                                                                             | 4       |
| <b>Methods</b>               |         |                                                                                                                                                                                                              |         |
| Study design                 | 4       | Present key elements of study design early in the paper                                                                                                                                                      | 6       |
| Setting                      | 5       | Describe the setting, locations, and relevant dates, including periods of recruitment, exposure, follow-up, and data collection                                                                              | 5-6     |
| Participants                 | 6       | (a) Give the eligibility criteria, and the sources and methods of selection of participants. Describe methods of follow-up                                                                                   | 5-6     |
|                              |         | (b) For matched studies, give matching criteria and number of exposed and unexposed                                                                                                                          | —       |
| Variables                    | 7       | Clearly define all outcomes, exposures, predictors, potential confounders, and effect modifiers. Give diagnostic criteria, if applicable                                                                     | 7-8     |
| Data sources/<br>measurement | 8*      | For each variable of interest, give sources of data and details of methods of assessment (measurement). Describe comparability of assessment methods if there is more than one group                         | 7-8     |
| Bias                         | 9       | Describe any efforts to address potential sources of bias                                                                                                                                                    | 8       |
| Study size                   | 10      | Explain how the study size was arrived at                                                                                                                                                                    | 5-6     |
| Quantitative variables       | 11      | Explain how quantitative variables were handled in the analyses. If applicable, describe which groupings were chosen and why                                                                                 | 8-9     |
| Statistical methods          | 12      | (a) Describe all statistical methods, including those used to control for confounding                                                                                                                        | 8-9     |
|                              |         | (b) Describe any methods used to examine subgroups and interactions                                                                                                                                          | 8-9     |
|                              |         | (c) Explain how missing data were addressed                                                                                                                                                                  | 6-7     |
|                              |         | (d) If applicable, explain how loss to follow-up was addressed                                                                                                                                               | 6-7     |
|                              |         | (e) Describe any sensitivity analyses                                                                                                                                                                        | —       |
| <b>Results</b>               |         |                                                                                                                                                                                                              |         |
| Participants                 | 13*     | (a) Report numbers of individuals at each stage of study—eg numbers potentially eligible, examined for eligibility, confirmed eligible, included in the study, completing follow-up, and analysed            | 5-7     |
|                              |         | (b) Give reasons for non-participation at each stage                                                                                                                                                         | 5-7     |
|                              |         | (c) Consider use of a flow diagram                                                                                                                                                                           | —       |
| Descriptive data             | 14*     | (a) Give characteristics of study participants (eg demographic, clinical, social) and information on exposures and potential confounders                                                                     | Table 1 |
|                              |         | (b) Indicate number of participants with missing data for each variable of interest                                                                                                                          | 6-7     |
|                              |         | (c) Summarise follow-up time (eg, average and total amount)                                                                                                                                                  | 6       |
| Outcome data                 | 15*     | Report numbers of outcome events or summary measures over time                                                                                                                                               | 10      |
| Main results                 | 16      | (a) Give unadjusted estimates and, if applicable, confounder-adjusted estimates and their precision (eg, 95% confidence interval). Make clear which confounders were adjusted for and why they were included | 10-12   |
|                              |         | (b) Report category boundaries when continuous variables were categorized                                                                                                                                    | 12      |
|                              |         | (c) If relevant, consider translating estimates of relative risk into absolute risk for a meaningful time period                                                                                             | —       |

|    |                          |    |                                                                                                                                                                            |                  |
|----|--------------------------|----|----------------------------------------------------------------------------------------------------------------------------------------------------------------------------|------------------|
| 1  |                          |    |                                                                                                                                                                            |                  |
| 2  | Other analyses           | 17 | Report other analyses done—eg analyses of subgroups and interactions, and sensitivity analyses                                                                             | page(s)<br>10-11 |
| 3  |                          |    |                                                                                                                                                                            |                  |
| 4  | <b>Discussion</b>        |    |                                                                                                                                                                            |                  |
| 5  |                          |    |                                                                                                                                                                            |                  |
| 6  | Key results              | 18 | Summarise key results with reference to study objectives                                                                                                                   | 13/18            |
| 7  | Limitations              | 19 | Discuss limitations of the study, taking into account sources of potential bias or imprecision. Discuss both direction and magnitude of any potential bias                 | 13               |
| 8  |                          |    |                                                                                                                                                                            |                  |
| 9  | Interpretation           | 20 | Give a cautious overall interpretation of results considering objectives, limitations, multiplicity of analyses, results from similar studies, and other relevant evidence | 13-16/17         |
| 10 |                          |    |                                                                                                                                                                            |                  |
| 11 | Generalisability         | 21 | Discuss the generalisability (external validity) of the study results                                                                                                      | 14               |
| 12 |                          |    |                                                                                                                                                                            |                  |
| 13 | <b>Other information</b> |    |                                                                                                                                                                            |                  |
| 14 |                          |    |                                                                                                                                                                            |                  |
| 15 | Funding                  | 22 | Give the source of funding and the role of the funders for the present study and, if applicable, for the original study on which the present article is based              | 19               |
| 16 |                          |    |                                                                                                                                                                            |                  |
| 17 |                          |    |                                                                                                                                                                            |                  |

\*Give information separately for exposed and unexposed groups.

**Note:** An Explanation and Elaboration article discusses each checklist item and gives methodological background and published examples of transparent reporting. The STROBE checklist is best used in conjunction with this article (freely available on the Web sites of PLoS Medicine at <http://www.plosmedicine.org/>, Annals of Internal Medicine at <http://www.annals.org/>, and Epidemiology at <http://www.epidem.com/>). Information on the STROBE Initiative is available at <http://www.strobe-statement.org>.



**Return to work following unintentional injury: a prospective follow-up study**

|                                 |                                                                                                                                                                                                                                                                                                                                                                      |
|---------------------------------|----------------------------------------------------------------------------------------------------------------------------------------------------------------------------------------------------------------------------------------------------------------------------------------------------------------------------------------------------------------------|
| Journal:                        | <i>BMJ Open</i>                                                                                                                                                                                                                                                                                                                                                      |
| Manuscript ID:                  | bmjopen-2013-003635.R2                                                                                                                                                                                                                                                                                                                                               |
| Article Type:                   | Research                                                                                                                                                                                                                                                                                                                                                             |
| Date Submitted by the Author:   | 13-Nov-2013                                                                                                                                                                                                                                                                                                                                                          |
| Complete List of Authors:       | Hepp, Urs; Psychiatric Services Aargau AG, Schnyder, Ulrich; University Hospital Zurich, Department of Psychiatry and Psychotherapy<br>Hepp-Beg, Sofia; Private Practice, Friedrich-Perez, Josefina; Hospital Männedorf, Stulz, Niklaus; Psychiatric Services Aargau AG, Moergeli, Hanspeter; University Hospital Zurich, Department of Psychiatry and Psychotherapy |
| <b>Primary Subject Heading</b>: | Mental health                                                                                                                                                                                                                                                                                                                                                        |
| Secondary Subject Heading:      | Emergency medicine                                                                                                                                                                                                                                                                                                                                                   |
| Keywords:                       | MENTAL HEALTH, Adult surgery < SURGERY, OCCUPATIONAL & INDUSTRIAL MEDICINE, PSYCHIATRY, REHABILITATION MEDICINE                                                                                                                                                                                                                                                      |
|                                 |                                                                                                                                                                                                                                                                                                                                                                      |

SCHOLARONE™  
Manuscripts

1  
2  
3  
4  
5  
6  
7  
8 **Return to work following unintentional injury: a prospective follow-up study**  
9

10  
11  
12  
13  
14 Urs Hepp, Ulrich Schnyder, Sofia Hepp-Beg, Josefina Friedrich-Perez, Niklaus Stulz,  
15 Hanspeter Moergeli  
16

17  
18  
19  
20  
21  
22 Outpatient Department, Psychiatric Services Aargau (Teaching Hospital of the University of  
23 Zurich), CH-5201 Brugg, Switzerland Urs Hepp head of department  
24 Department of Psychiatry and Psychotherapy, University Hospital Zurich, CH-8091 Zurich,  
25 Switzerland Ulrich Schnyder head of department  
26 Private Practice, CH-8032 Zurich, Switzerland Sofia Hepp-Beg private practitioner  
27 Hospital Männedorf AG, CH-8708 Männedorf, Switzerland Josefina Friedrich-Perez senior  
28 physician  
29 Outpatient Department, Psychiatric Services Aargau (Teaching Hospital of the University of  
30 Zurich), CH-5201 Baden, Switzerland Niklaus Stulz research associate  
31 Department of Psychiatry and Psychotherapy, University Hospital Zurich, CH-8091 Zurich,  
32 Switzerland Hanspeter Moergeli senior researcher  
33  
34  
35  
36  
37  
38  
39  
40  
41  
42  
43

44 Correspondence to: U Hepp [urs.hepp@pdag.ch](mailto:urs.hepp@pdag.ch)  
45  
46  
47  
48

49 Word count: 4033  
50  
51  
52  
53  
54  
55  
56  
57  
58  
59  
60

## Abstract

### Objective

The aim of this study was to predict time off work following unintentional injuries due to accidents leading to hospital admission.

### Design

Prospective 6 months follow-up study.

### Setting

Department of trauma surgery of a university hospital.

### Participants

Consecutively recruited victims of unintentional injuries (n=221) hospitalised for a minimum of 32 hours including two consecutive nights. All participants were aged 18-65 years and able to participate in an assessment within 30 days of the accident.

### Main outcome measures

Interview-assessed number of days off work during the 6 months immediately following the accident.

### Results

The patients' subjective appraisals of a) accident severity and b) their ability to cope with the resulting injury and its job-related consequences predicted time off work following the accident beyond the impact of the objective severity of their injury and the type of accident involved.

### Conclusions

Patients' subjective appraisals of the accident severity and of their ability to cope with its consequences are highly relevant for return to work after accidents. Extending findings from

1  
2  
3  
4  
5  
6  
7  
8  
9  
10  
11  
12  
13  
14  
15  
16  
17  
18  
19  
20  
21  
22  
23  
24  
25  
26  
27  
28  
29  
30  
31  
32  
33  
34  
35  
36  
37  
38  
39  
40  
41  
42  
43  
44  
45  
46  
47  
48  
49  
50  
51  
52  
53  
54  
55  
56  
57  
58  
59  
60

previous studies in severely injured and otherwise pre-selected accident victims, this seems to apply to the whole spectrum of patients hospitalised with unintentional injuries.

For peer review only



## Article summary

### Strengths and limitations of the study

- The application of very few exclusion criteria may have strengthened the study's external validity (generalisability), but at the same time may have limited its internal validity (i.e., factors other than the unintentional, accident-related injury might have influenced time off work).
- There were 68 (23.5%) drop-outs from baseline to follow-up, which however did not differ from the completers with respect to available patient and accident-related characteristics.
- Sick leave after unintentional injuries due to accidents was assessed in terms of time off work during the follow-up period, which provided a more accurate estimation of work-related consequences of accidents than the mere assessment whether the accident victim had returned to work or not at a particular point in time.
- However, the number of days off work was assessed by means of self-reports by the patients due to strict data privacy protection laws in Switzerland.



## Introduction

In the EU every year 6.5 million people are admitted to hospitals following unintentional injuries due to accidents.<sup>1</sup> This figure corresponds to more than 1% of the 500 million inhabitants in the EU. In addition to the direct costs of the treatment, unintentional injuries cause even higher indirect costs. Sick-leave following unintentional injuries is one of the most important contributors to these indirect costs.<sup>2,3</sup> Return to work is one of the most relevant measures of functional outcome of injuries,<sup>4</sup> and there is a growing body of literature on return to work after chronic injuries such as low-back pain.<sup>5</sup> However, there are still relatively few studies on return to work after unintentional injuries due to accidents.<sup>2,6-14</sup>

Generally, return to work is not only predicted by injury related or medical factors. Job related factors,<sup>2,12,15,16</sup> socioeconomic factors,<sup>2,7,9,12,17</sup> psychological distress,<sup>9,11,12</sup> causal attribution,<sup>18</sup> and compensation eligibility<sup>10,19</sup> become increasingly important factors for return to work the longer the medical condition lasts. How patients' expectations of recovery affect their health and vocational outcome is insufficiently researched.<sup>20,21</sup> Compared to those remaining on sick-leave, patients returning to work after injury had stronger internal health beliefs, i.e. they believed they had an influence on their own health and considered themselves powerful.<sup>7</sup> In several studies involving various medical conditions, patients' own expectations and predictions of their future work ability predicted return to work.<sup>22-24</sup> There are relatively few studies examining the role of the subjectively experienced accident severity and the subjectively experienced ability to cope with the unintentional injury regarding return to work.<sup>7,9,13,25</sup> The findings from these studies cannot be generalised as they are compromised by their highly selective samples: the studies were either restricted to severely injured patients without pre-existing mental disorders,<sup>7,8,13,26</sup> and/or they excluded foreign-language patients.<sup>7</sup>

1  
2  
3  
4  
5  
6  
7  
8  
9  
10  
11  
12  
13  
14  
15  
16  
17  
18  
19  
20  
21  
22  
23  
24  
25  
26  
27  
28  
29  
30  
31  
32  
33  
34  
35  
36  
37  
38  
39  
40  
41  
42  
43  
44  
45  
46  
47  
48  
49  
50  
51  
52  
53  
54  
55  
56  
57  
58  
59  
60

<sup>8 12 13 19 26 27</sup> In a previous study of severely injured accident victims we found that time off work was best predicted by the patients' own appraisals of accident severity and by the patients' own expectations regarding their ability to cope with the unintentional injury and its job-related consequences.<sup>13</sup> Whereas at the one-year follow-up, injury severity measured by the injury severity score (ISS)<sup>28</sup> and type of accident (traffic, workplace, sporting/leisure) were also predictive of time off work,<sup>8</sup> at the three-years follow-up only the self-reported appraisals of accident severity and the patients' ability to cope with the unintentional injury remained predictive of days absent from the workplace.<sup>13</sup> However, the sample in this previous study was highly selective. We included only severely injured (ISS $\geq$ 10), German-speaking patients and excluded patients who had been under treatment for any mental disorders and/or serious somatic illnesses at the time of the accident. By doing this we may have excluded patients at a higher risk for sick-leave and the results may therefore not be generalised to apply to all accident survivors.

The aim of this study was to predict time off work (i.e., the number of sick-leave days) during the first 6 months following unintentional, accident-related injuries in an independent, larger and less selective sample of patients with any unintentional injury requiring hospital admission.

## Methods

### Sample

Participants were recruited from the Department of Trauma Surgery at the Zurich University Hospital. All the patients qualifying for the study had sustained unintentional injuries that required hospitalisation for a minimum of 32 hours including two consecutive nights (the latter guaranteed exclusion of patients who were treated in the emergency room overnight but who were not really hospitalised on a ward of the Department of Trauma Surgery). Further inclusion criteria were: age between 18 to 65 years; ability to participate in an extensive assessment within 30 days of the accident; and sufficient proficiency in one of the study languages (German, Italian, Spanish, Portuguese, Serbo-Croatian, Turkish, or Albanian) to participate in the interview and to complete the self-report questionnaires. Non-German speaking participants were assessed using interpreters and professionally translated psychometric instruments. Exclusion criteria were: a Glasgow Coma Scale score (GCS)<sup>29</sup> below 9; unconsciousness for more than 15 minutes after the accident; pathological findings in the cranial CT; attempted suicide.

In contrast to our previous study,<sup>8 13</sup> neither serious somatic illness, nor being in treatment for a mental disorder prior to the accident was an exclusion criterion in the present study.<sup>30</sup> Note that the sample of the previous study<sup>8 13</sup> and the sample of the present study on time off work were completely independent from each other (recruitment of the second sample started 18 months after the end of recruitment for the first sample). With regard to the possibility of generalising the present study's findings, we also retained patients for the present study who showed marked clinical signs or symptoms of mental disorders that were obviously unrelated to the unintentional injury.

1  
2  
3  
4  
5  
6  
7  
8 Patients were recruited over a period of 12 months. During this time period 787 patients aged  
9  
10 between 18 and 65 years were admitted with unintentional injuries. Of these patients 253 did  
11  
12 not meet the inclusion criteria due to early discharge (104; 41.1%), poor clinical condition  
13  
14 (74; 29.2%), GCS score below 9 (46; 18.2%), insufficient proficiency in one of the study  
15  
16 languages (21; 8.3%) or other reasons (29; 11.5%) (multiple reasons possible). As a result,  
17  
18 534 patients fulfilled all criteria and were eligible for the study. Due to a restricted  
19  
20 interviewing capacity, not all the eligible patients could be assessed. The following procedure  
21  
22 was applied to ensure the recruitment of a representative sample and to control for potential  
23  
24 bias attributable to the time of admission: on day 1, every other consecutive patient (i.e.  
25  
26 patient 1, 3, 5, etc.) was interviewed. On day 2 the order of the list of admissions was reversed  
27  
28 so that the last patient admitted was interviewed first, the third last patient was interviewed  
29  
30 second and so forth. On day 3, the order was reversed again, etc. The 148 patients who could  
31  
32 not be contacted due to our limited interviewing capacity did not differ from the participating  
33  
34 patients with regard to age (mean difference=-0.40 years; 95%-CI=-2.93 to 2.12;  $t=-0.31$ ;  
35  
36  $df=481$ ;  $P=0.754$ ) and gender (Pearson's  $\chi^2=0.77$ ,  $df=1$ ,  $P=0.375$ ). Of the 386 patients who  
37  
38 were contacted, 335 gave their written consent to participate. The 51 (13.2%) who declined  
39  
40 participation did not differ significantly from the participating patients with regard to age  
41  
42 (mean difference=3.75 years; 95%-CI=-0.12 to 7.61;  $t=-1.91$ ;  $df=384$ ;  $P=0.057$ ) and gender  
43  
44 (Pearson's  $\chi^2=0.07$ ;  $df=1$ ;  $P=0.792$ ).  
45  
46  
47  
48  
49  
50  
51

52 After the exclusion of a small number of victims of physical violence ( $n=12$ ), the sample  
53  
54 consisted of 323 patients who all attended the interview at T1. On average the T1 interview  
55  
56 was performed 5 days after the referral to the hospital (SD 4.2 days; range: 2 to 28 days).  
57  
58  
59  
60

1  
2  
3  
4  
5  
6 patients had no regular work and were excluded from further analyses regarding time off  
7  
8 work. However, four patients who were receiving unemployment compensation at the time of  
9  
10 the accident were retained for further analyses. For these patients accident-related time off  
11  
12 work was traceable since they needed a doctor's certificate to continue to be eligible for  
13  
14 unemployment compensation. In all, valid data regarding time off work were obtainable from  
15  
16 289 patients.  
17  
18  
19  
20

21 On average the follow-up interview (T2) took place 188 (SD 16.2; range 155 to 257) days  
22  
23 after the unintentional injury. 68 (23.5%) dropped out during the follow-up period; these 68  
24  
25 drop-outs did not differ significantly from the final sample with regard to age (mean  
26  
27 difference=-2.78 years; 95%-CI=-6.13 to 0.57;  $t=-1.63$ ;  $df=287$ ;  $P=0.104$ ), gender (Pearson's  
28  
29  $\chi^2=3.3$ ;  $df=1$ ;  $P=0.069$ ), type of accident (Pearson's  $\chi^2=6.5$ ;  $df=1$ ;  $P=0.088$ ), clinician-rated  
30  
31 Injury Severity Score<sup>28</sup> (mean difference=-0.77; 95%-CI=-3.54 to 1.99;  $t=-0.55$ ;  $df=287$ ;  
32  
33  $P=0.582$ ), and patient-rated subjective accident severity ( $t=1.19$ ;  $df=287$ ;  $P=0.237$ ), appraisal  
34  
35 of coping abilities (mean difference=-0.16; 95%-CI=-0.37 to 0.04;  $t=-1.58$ ;  $df=283$ ;  $P=0.115$ ),  
36  
37 and intrusions as measured by the Impact of Event Scale<sup>31</sup> (mean difference=0.87; 95%-CI=-  
38  
39 1.14 to 2.28;  $t=0.86$ ;  $df=276$ ;  $P=0.393$ ). The final sample consisted of 221 patients.  
40  
41  
42  
43  
44

#### 45 Measures

46  
47 The Injury Severity Score (ISS)<sup>28</sup> and the Glasgow Coma Scale (GCS)<sup>29</sup> were routinely  
48  
49 assessed by the surgeons immediately after admission to the emergency room. The ISS  
50  
51 permits an evaluation of the severity of injuries by a trauma surgeon: Each part or area of the  
52  
53 body affected is given a score (1=minimum to 6=fatal injury). If the score is 6 in one area, the  
54  
55 ISS is assigned a sum score of 75. Otherwise, the scores for the three most severely injured  
56  
57  
58  
59  
60

1  
2  
3  
4  
5  
6 areas of the body are squared and then summed, producing a maximum score of 75. Patients  
7  
8 with a score of 10 or more are generally considered severely injured. The GCS is an observer-  
9  
10 rated scale for the clinical appraisal of the gravity of coma after injury to the skull and brain.  
11  
12 Patients with severe traumatic brain injuries generally have a score under 9.

13  
14  
15  
16  
17 The semi-structured interview at T1 covered socio-demographic data, a detailed work record  
18  
19 and information about the accident. Existing pre-accident psychiatric disorders were assessed  
20  
21 using the Primary Care Evaluation of Mental Disorders.<sup>32</sup> The patients rated their appraisal of  
22  
23 the injury severity on a Likert scale ranging from “1=very slight” to “5=very severe”. They  
24  
25 also rated their ability to cope with the unintentional injury and its job-related consequences  
26  
27 on a Likert scale ranging from “1=very poor” to “5=very good”.<sup>8 13</sup> Posttraumatic  
28  
29 psychological symptoms were assessed by the Impact of Event Scale (IES),<sup>31</sup> a 15 item self-  
30  
31 rating questionnaire comprising two subscales (intrusion and avoidance) with high reliability  
32  
33 and validity.<sup>33</sup> Time off work, assessed at 6 months (T2) post-accident, was defined as the  
34  
35 patient-reported number of sick-leave days attributable to the unintentional injury and its  
36  
37 consequences including time of hospitalisation. To record their sick-leave days the patients  
38  
39 used a specified journal they received at T1. A week off work was set to equal seven days of  
40  
41 leave. Where subjects returned to work on a part-time basis, the days on which they worked  
42  
43 less were added to the days of leave on a pro rata basis.<sup>13</sup> The interviews were performed by  
44  
45 two medical doctors (SHB and JFP). Each patient was interviewed by the same interviewer at  
46  
47 T1 and T2. Detailed information on the study design and the interrater reliability is described  
48  
49 in an earlier publication on the incidence of PTSD in that sample.<sup>34</sup>  
50  
51  
52  
53  
54  
55

## 56 **Statistical analysis**

57  
58  
59  
60

1  
2  
3  
4  
5  
6 Hierarchical linear multiple regression analyses were performed to predict the number of sick-  
7  
8 leave days. They allowed for highlighting the relevance of patient's appraisal among the  
9  
10 selected potential predictor variables. To enable us to enter the type of accident (road traffic,  
11  
12 workplace, household, or leisure-time accidents) as a predictor into the multiple regression  
13  
14 analysis, this categorical variable was converted into a set of three new variables so that a  
15  
16 deviation contrast resulted. In this way the effect of each accident category was compared to  
17  
18 the mean effect of all accident categories. Since there was one new variable for each degree of  
19  
20 freedom, one accident category (household) had to be omitted in the regression analysis. In the  
21  
22 final regression model including all potential predictors multi-collinearity was low (tolerance  
23  
24  $>0.75$ ) and the distribution of regression standardised residuals was normal (Kolmogorov-  
25  
26 Smirnov  $Z=0.63$ ,  $P=0.827$ ). Group comparisons of dimensional variables were performed  
27  
28 with t-tests.  
29  
30  
31  
32  
33

#### 34 Ethical approval

35  
36 Ethical approval was granted by the Ethics Committee of the Canton of Zurich. Written  
37  
38 informed consent was obtained from all participants.  
39  
40  
41  
42  
43  
44  
45  
46  
47  
48  
49  
50  
51  
52  
53  
54  
55  
56  
57  
58  
59  
60

## Results

The socio-demographic characteristics are presented in table 1. 35 (15.8%) of the 221 patients suffered from one or multiple pre-existing mental disorders immediately prior to the accident, and 31 patients (14.0%) did not speak German. Characteristics related to the unintentional injury of the 221 patients are found in table 2. The types of accident were as follows: 72 (32.6%) traffic accidents, 66 (29.9%) workplace accidents, 6 (2.7%) household accidents, and 77 (34.8%) sports/leisure activity-related accidents. The mean ISS differed significantly between the types of accident (traffic: M 16.0, SD 12.4; workplace or household: M 11.8, SD 8.2; sporting/leisure activity: M 8.7, SD 7.7; ANOVA:  $F=10.7$ ;  $df=2, 218$ ;  $P<0.001$ ).

According to the surgeons' files, 44 (19.9%) patients sustained a mild or moderate traumatic brain injury (MTBI). 41 (18.6%) patients were first referred to the intensive care unit (ICU), with a mean duration of ICU stay of 4.0 days (SD 3.7; range 1-19). The mean length of stay at the acute hospital including the ICU was 15.8 days (SD 16.9; range 2-110). 46 patients had a further stay in a rehabilitation hospital, with a mean length of stay of 35.0 days (SD 25.0; range 3-141). The mean number of sick-leave days was 95.7 (SD 58.1; range 6-183). Patients suffering from pre-existing mental disorders did not differ significantly from the rest of the sample with regard to the number of sick-leave days (mean difference=2.7 days; 95%-CI=-18.4 to 23.8;  $t=0.25$ ;  $df=219$ ;  $P=0.801$ ).

Bivariate correlations of all variables included in the regression analyses are presented in table 3. The objective injury severity (ISS) and the patients' subjective appraisals of the accident severity were positively correlated. Subjective appraisals of the accident severity (but not the objective injury severity scores) were negatively related with self-rated coping abilities.



1  
2  
3  
4  
5  
6 Time off work was significantly correlated with the injury severity (ISS), IES intrusion scores,  
7  
8 and the patients' own appraisals of both their injury severity and their coping abilities. Finally,  
9  
10 time off work was longer after workplace related accidents and shorter after sports/leisure  
11  
12 accidents.

13  
14  
15  
16  
17 In a simultaneous regression analysis the variables injury severity (ISS), sex, age, type of  
18  
19 accident (road traffic, workplace, or leisure-time accidents), and IES intrusion were entered as  
20  
21 potential predictors of time off work. Combined, these predictors explained 24.3% of the  
22  
23 variance of time off work ( $F=9.75$ ;  $df=7, 213$ ;  $P<0.001$ ). When in a series of hierarchical  
24  
25 regressions each of these predictors was examined when added last to this first set, ISS (8.3%,  
26  
27  $F=23.38$ ;  $df=1, 213$ ;  $P<0.001$ ), type of accident (7.6%;  $F$  change= $7.14$ ;  $df=3, 213$ ;  $P<0.001$ ),  
28  
29 and IES intrusion added unique variance (2.0%;  $F=5.63$ ;  $df=1, 213$ ;  $P=0.019$ ). These five  
30  
31 variables were then treated as the first set added in hierarchical regressions focusing on two  
32  
33 additional predictors, patients' appraisals of accident severity and of their coping abilities.  
34  
35 These two variables were entered in the second step accounting for an additional 9.4% of the  
36  
37 variance of the time off work 6 months post accident ( $F$  change= $15.04$ ;  $df=2, 211$ ;  $P<0.001$ ).  
38  
39 Self-reported appraisal of accident severity added 6.0% ( $F$  change= $18.14$ ;  $df=1, 212$ ,  
40  
41  $P<0.001$ ), and self reported appraisal of their coping abilities added 4.7% ( $F$  change= $14.17$ ;  
42  
43  $df=1, 212$ ;  $P<0.001$ ). Finally, each of the seven predictors in table 4 was evaluated for unique  
44  
45 variance contributed with the other six predictors already in the model. The severity of the  
46  
47 injury (ISS), type of accident, and the two appraisals variables remained significant, whereas  
48  
49 age, gender, and IES intrusion did not contribute significantly to the prediction of time off  
50  
51 work.  
52  
53  
54  
55  
56  
57  
58  
59  
60

1  
2  
3  
4  
5  
6 In order to visualize the effects of appraisals on sick-leave days, the sample was divided into  
7  
8 four groups based on median-splits in the two variables appraisal of accident severity and  
9  
10 appraisal of coping abilities (fig. 1). The median was 4 Likert points in the subjective accident  
11  
12 severity scale, and 5 Likert points in the self-rated coping abilities scale. Patients with values  
13  
14 equal or higher than the median were grouped as 'higher' in the respective characteristic,  
15  
16 patients with values lower than the median were grouped as 'lower' concerning subjective  
17  
18 injury severity or self-rated coping abilities, respectively. Regarding the two groups of  
19  
20 particular interest, namely patients who assessed the accident severity as higher and their  
21  
22 coping abilities as lower, compared with patients who estimated the accident severity as lower  
23  
24 and their coping abilities as higher, there were twice as many sick-leave days for the former  
25  
26 group (mean difference=-68.1 days; 95%-CI=-85.7 to -50.5;  $t=-7.67$ ;  $df=124$ ;  $P<0.001$ ).  
27  
28  
29  
30  
31  
32  
33  
34  
35  
36  
37  
38  
39  
40  
41  
42  
43  
44  
45  
46  
47  
48  
49  
50  
51  
52  
53  
54  
55  
56  
57  
58  
59  
60

## Discussion

How patients perceive the severity of their accident and their ability to cope with the resulting injury and its job-related consequences are crucial predictors for return to work after unintentional injuries which lead to hospital admission. The current study demonstrated that the patients' own appraisals of the severity of their accident and of their coping resources predict time off work after accidents leading to hospital admission beyond the impact of the objective injury severity (ISS).

Some limitations of this study have to be addressed. To enable the findings from this current study to be better generalised to all hospitalised accident victims, we applied very few exclusion criteria. For example, we did not exclude patients with pre-existing somatic and psychiatric morbidity or non-ICU patients. While this may have strengthened the external validity of our findings, factors other than the unintentional injury might have influenced outcomes. By including patients with pre-existing somatic and psychiatric morbidity we possibly included patients who were at higher risk for sick-leave following unintentional injury. However, patients suffering from pre-existing mental disorders did not differ from other patients with regard to the number of sick-leave days. The inclusion criterion of being hospitalised for at least 32 hours including two consecutive nights may limit the generalisability of the study's findings, but guaranteed that all patients in the sample were really hospitalised and not only received an overnight treatment in the emergency room (which formally is an instance of hospitalisation but in fact is an outpatient treatment).

Another factor that may affect return to work is compensation eligibility.<sup>10 19</sup> In Switzerland all inhabitants receive compensation in the case of work incapacity or disability independent of the type of accident. For employees there is a mandatory accident insurance that covers

1  
2  
3  
4  
5  
6 both work- and non-work-related injuries due to accidents. Thus, it is unlikely that different  
7  
8 compensation rules related to different types of accidents biased our results. Nevertheless, the  
9  
10 very generous compensation system in Switzerland may limit the generalisability of our  
11  
12 findings to other countries with other or less generous compensation systems. Furthermore,  
13  
14 there were 68 (23.5%) drop-outs from T1 to T2 in our study. It is unlikely that these drop-outs  
15  
16 affected the results substantially as they did not differ significantly from the final sample.  
17  
18 Finally, the number of days off work was assessed by means of self-report by the patients.  
19  
20 Strict data privacy protection laws in Switzerland prevent the use of health insurance  
21  
22 companies' data for the purpose of research projects. Such data would have been more  
23  
24 reliable.  
25  
26

27  
28  
29  
30 The relevance of psychosocial and subjective factors for a successful return to work after  
31  
32 accidents has been increasingly recognised in literature.<sup>7 11 20 26 27 35</sup> The total amount of  
33  
34 explained variance in the present study was moderate ( $R^2=.34$ ) but within the range of  
35  
36 comparable studies.<sup>8 9 12-14 26</sup> Nevertheless, this suggests that other factors than the ones we  
37  
38 examined are also important regarding return to work. Extending the findings from previous  
39  
40 studies among severely injured accident victims,<sup>7 8 13</sup> the current study confirmed the  
41  
42 predictive value of patients' subjective appraisals of the accident severity for the whole  
43  
44 spectrum of patients admitted to hospitals with unintentional injuries. In contrast to our  
45  
46 previous study in severely injured accident victims who were hospitalised at the ICU,<sup>8 13</sup> the  
47  
48 completely independent sample of the current study included all unintentional injuries leading  
49  
50 to hospital admission, with only 18.6% of the patients requiring ICU treatment. In an effort to  
51  
52 enable the findings from this current study to be better generalised, unlike in our previous  
53  
54 study with another sample,<sup>8 13</sup> we did not exclude foreign language patients and patients with  
55  
56  
57  
58  
59  
60

1  
2  
3  
4  
5  
6 pre-existing somatic illnesses and mental disorders. In some cases these particular patients  
7  
8 may be less well socially integrated or have greater difficulties dealing with the consequences  
9  
10 of unintentional injuries; both being risk factors for work disability. In our heterogeneous  
11  
12 sample including moderately injured and foreign language accident victims with pre-existing  
13  
14 somatic and psychiatric morbidity, the subjectively experienced accident severity predicted  
15  
16 time off work after the accidents to the same degree as the objective injury severity  
17  
18 (regression weights: Betas = .24 vs. .25). The role of the objective injury severity regarding  
19  
20 time off work after unintentional injuries is ambiguous. In keeping with some previous  
21  
22 studies,<sup>2,7,8</sup> we found the more severe injuries to be related to more days off work. However,  
23  
24 some other studies could not find that association.<sup>9,11,12,36</sup> These inconsistent findings might  
25  
26 be explained by the different ranges of injury severities and by the different follow-up  
27  
28 intervals used in different studies. The wider the range of injury severities in a study, the  
29  
30 higher the chance that the severity of the physical impairment predicts subsequent time off  
31  
32 work. The more time that has elapsed since the accident, the less impact the objective injury  
33  
34 severity is expected to have on time off work. The physical condition may play a more  
35  
36 important role immediately following the accident because hospitalisation and rehabilitation  
37  
38 directly contribute to the time off work, whereas in the longer term other factors might gain in  
39  
40 importance regarding sick-leave. In our previous study among severely injured accident  
41  
42 victims, the objective injury severity predicted time off work during the first year after the  
43  
44 accident but was no longer predictive for the number of days off work at the three year follow-  
45  
46 up.<sup>8,13</sup> In a longer term perspective, factors other than the objective physical impairment, e.g.  
47  
48 psychosocial or subjective factors, might gain in importance regarding return to work.  
49  
50  
51  
52  
53  
54  
55  
56  
57  
58  
59  
60

1  
2  
3  
4  
5  
6 Concerning subjective factors predicting return to work, the patients' appraisals of the ability  
7  
8 to cope with the unintentional injury and its job-related consequences turned out to be another  
9  
10 important predictor of sick-leave after hospital admissions due to unintentional, accident-  
11  
12 related injuries. The more coping resources patients perceived themselves to have at their  
13  
14 disposal immediately after the accident, the better his or her chances for vocational  
15  
16 rehabilitation actually were. The significance of subjectively perceived coping abilities for  
17  
18 return to work has already been found in earlier studies.<sup>8 12 13</sup> The predictive value of the  
19  
20 patients' appraisals of the accident severity and of the coping abilities regarding time off work  
21  
22 after unintentional injuries may be explained by Lazarus' theories on stress, appraisal and  
23  
24 coping.<sup>37 38</sup> Lazarus emphasized the significance of primary and secondary appraisal of a  
25  
26 stressful situation or event. In a primary appraisal the same situation can be judged as harmful,  
27  
28 as a threat or as a challenge by different individuals. In a secondary appraisal the individual  
29  
30 judges the ability to cope with the situation depending on his or her individual coping  
31  
32 strategies. If a stressful situation is appraised as controllable by action, problem-focused  
33  
34 coping will predominate. In a situation viewed as refractory to change, however, emotion-  
35  
36 focused coping is more likely to predominate. Among accident victims these two steps of  
37  
38 appraisals seem to be related. In our sample, the more threatening the patients judged their  
39  
40 accident to have been, the fewer resources they perceived themselves to have at their disposal  
41  
42 for coping with the unintentional injury and its job-related consequences. However, the  
43  
44 subjective appraisal of the coping abilities was not correlated with the objective injury  
45  
46 severity. This further emphasizes the importance of considering not only the patient's  
47  
48 objective injury severity but also their own appraisal of the accident severity and the coping  
49  
50 abilities when predicting the chances of return to work. Coping with stressful events is  
51  
52 increasingly viewed as a process rather than an inert (personality) style. If coping is open to  
53  
54  
55  
56  
57  
58  
59  
60

1  
2  
3  
4  
5  
6  
7  
8  
9  
10  
11  
12  
13  
14  
15  
16  
17  
18  
19  
20  
21  
22  
23  
24  
25  
26  
27  
28  
29  
30  
31  
32  
33  
34  
35  
36  
37  
38  
39  
40  
41  
42  
43  
44  
45  
46  
47  
48  
49  
50  
51  
52  
53  
54  
55  
56  
57  
58  
59  
60

change over time in accordance with the situational context,<sup>30 37</sup> this may be promising for preventive and therapeutic interventions.

For peer review only

## Conclusion

A patient's own appraisal of the severity of their accident and of their ability to cope with the unintentional injury and its job-related consequences, are highly relevant for return to work after accidents leading to hospital admission. Both subjective appraisals predict time off work beyond the impact of the objective injury severity in the whole spectrum of patients hospitalised due to unintentional injuries.

In Western countries the quality of surgical care of accident victims has reached a high standard. In patients hospitalised with unintentional injuries, even where acute surgical care is inevitable, from a less immediate standpoint and bearing in mind future rehabilitation, a patient's subjective assessment seems to gain in importance where their recovery is concerned. It appears that relevant prognostic information regarding return to work can be obtained by asking the patient two simple questions:

- 1.) How severe do you think your accident was?
- 2.) How well do you think you will be able to handle the consequences of the accident with regard to return to work?

Any comprehensive treatment following unintentional injuries should routinely be accompanied by a brief psychosocial assessment and should include information and practical advice.



**Copyright**

The Corresponding Author has the right to grant on behalf of all authors and does grant on behalf of all authors, an exclusive licence (or non exclusive for government employees) on a worldwide basis to the BMJ Publishing Group Ltd to permit this article (if accepted) to be published in BMJ editions and any other BMJ PGL products and sublicences such use and exploit all subsidiary rights, as set out in our licence.

**Competing interests**

This study was supported by the Swiss National Science Foundation (32-053736.98). The Swiss National Science Foundation is a government-funded national institution. No commercial sponsorship was involved in the design and conduct of the study. All authors declare that they have no financial relationships with any organisation that might have an interest in the submitted work in the previous three years, and that they have no other relationships or activities that could appear to have influenced the submitted work.

**Author contributions**

US and HM designed the study. HM, SHB and JFP were involved in the data collection. HM performed the statistical analyses. UH, HM, NS, US were involved in the interpretation of the data. NS, UH and HM drafted the manuscript. US reviewed the manuscript several times. All authors have read and approved the final version of the manuscript.

**Data sharing**

There is no additional data available.

## References

1. Bauer R, Steiner M. Injuries in the European Union. Statistics Summary 2005-2007. Vienna: KfV, Austrian Road Safety Board, 2009.
2. MacKenzie EJ, Morris JA, Jr., Jurkovich GJ, Yasui Y, Cushing BM, Burgess AR, et al. Return to work following injury: the role of economic, social, and job-related factors. *Am J Public Health* 1998;88(11):1630-7.
3. Leigh JP, Markowitz SB, Fahs M, Shin C, Landrigan PJ. Occupational injury and illness in the United States. Estimates of costs, morbidity, and mortality. *Arch Intern Med* 1997;157(14):1557-68.
4. Ebel BE, Mack C, Diehr P, Rivara FP. Lost working days, productivity, and restraint use among occupants of motor vehicles that crashed in the United States. *Inj Prev* 2004;10(5):314-9.
5. Loisel P, Anema JR, editors. *Handbook of Work Disability. Prevention and Management*. New York, NY: Springer, 2013.
6. MacKenzie EJ, Shapiro S, Smith RT, Siegel JH, Moody M, Pitt A. Factors influencing return to work following hospitalization for traumatic injury. *Am J Public Health* 1987;77(3):329-34.
7. Soberg HL, Finset A, Bautz-Holter E, Sandvik L, Roise O. Return to work after severe multiple injuries: a multidimensional approach on status 1 and 2 years postinjury. *The Journal of trauma* 2007;62(2):471-81.
8. Schnyder U, Moergeli H, Klaghofer R, Sensky T, Buchi S. Does patient cognition predict time off from work after life-threatening accidents? *Am J Psychiatry* 2003;160(11):2025-31.

- 1  
2  
3  
4  
5  
6 9. Michaels AJ, Michaels CE, Moon CH, Zimmerman MA, Peterson C, Rodriguez JL.  
7  
8 Psychosocial factors limit outcomes after trauma. *The Journal of trauma*  
9  
10 1998;44(4):644-8.  
11  
12 10. Zelle BA, Panzica M, Vogt MT, Sittaro NA, Krettek C, Pape HC. Influence of workers'  
13  
14 compensation eligibility upon functional recovery 10 to 28 years after polytrauma.  
15  
16 *American journal of surgery* 2005;190(1):30-6.  
17  
18 11. Davydow DS, Zatzick DF, Rivara FP, Jurkovich GJ, Wang J, Roy-Byrne PP, et al.  
19  
20 Predictors of posttraumatic stress disorder and return to usual major activity in  
21  
22 traumatically injured intensive care unit survivors. *General hospital psychiatry*  
23  
24 2009;31(5):428-35.  
25  
26 12. Lange C, Burgmer M, Braunheim M, Heuft G. Prospective analysis of factors associated  
27  
28 with work reentry in patients with accident-related injuries. *J Occup Rehabil*  
29  
30 2007;17(1):1-10.  
31  
32 13. Hepp U, Moergeli H, Buchi S, Bruchhaus-Steinert H, Sensky T, Schnyder U. The long-  
33  
34 term prediction of return to work following serious accidental injuries: a follow up  
35  
36 study. *BMC Psychiatry* 2011;11:53.  
37  
38 14. Lilley R, Davie G, Ameratunga S, Derrett S. Factors predicting work status 3 months after  
39  
40 injury: results from the Prospective Outcomes of Injury Study. *BMJ Open*  
41  
42 2012;2(2):e000400.  
43  
44 15. Hunter SJ, Shaha S, Flint D, Tracy DM. Predicting return to work. A long-term follow-up  
45  
46 study of railroad workers after low back injuries. *Spine* 1998;23(21):2319-28.  
47  
48 16. Brewin CR, Robson MJ, Shapiro DA. Social and psychological determinants of recovery  
49  
50 from industrial injuries. *Injury* 1983;14(5):451-5.  
51  
52  
53  
54  
55  
56  
57  
58  
59  
60

- 1  
2  
3  
4  
5  
6  
7  
8  
9  
10  
11  
12  
13  
14  
15  
16  
17  
18  
19  
20  
21  
22  
23  
24  
25  
26  
27  
28  
29  
30  
31  
32  
33  
34  
35  
36  
37  
38  
39  
40  
41  
42  
43  
44  
45  
46  
47  
48  
49  
50  
51  
52  
53  
54  
55  
56  
57  
58  
59  
60
17. Andersson AL, Bunketorp O, Allebeck P. High rates of psychosocial complications after road traffic injuries. *Injury* 1997;28(8):539-43.
  18. Rusch MD, Dzwierzynski WW, Sanger JR, Pruitt NT, Siewert AD. Return to work outcomes after work-related hand trauma: the role of causal attributions. *The Journal of hand surgery* 2003;28(4):673-7.
  19. Hou WH, Sheu CF, Liang HW, Hsieh CL, Lee Y, Chuang HY, et al. Trajectories and predictors of return to work after traumatic limb injury--a 2-year follow-up study. *Scand J Work Environ Health* 2012;38(5):456-66.
  20. Mondloch MV, Cole DC, Frank JW. Does how you do depend on how you think you'll do? A systematic review of the evidence for a relation between patients' recovery expectations and health outcomes. *Cmaj* 2001;165(2):174-9.
  21. Ozegovic D, Carroll LJ, Cassidy JD. What influences positive return to work expectation? Examining associated factors in a population-based cohort of whiplash-associated disorders. *Spine (Phila Pa 1976)* 2010;35(15):E708-13.
  22. Hansen A, Edlund C, Henningsson M. Factors relevant to a return to work: a multivariate approach. *Work* 2006;26(2):179-90.
  23. Heijbel B, Josephson M, Jensen I, Stark S, Vingard E. Return to work expectation predicts work in chronic musculoskeletal and behavioral health disorders: prospective study with clinical implications. *J Occup Rehabil* 2006;16(2):173-84.
  24. Lindell O, Johansson SE, Strender LE. Predictors of stable return-to-work in non-acute, non-specific spinal pain: low total prior sick-listing, high self prediction and young age. A two-year prospective cohort study. *BMC Fam Pract* 2010;11:53.

- 1  
2  
3  
4  
5  
6 25. Lanes TC, Gauron EF, Spratt KF, Wernimont TJ, Found EM, Weinstein JN. Long-term  
7  
8 follow-up of patients with chronic back pain treated in a multidisciplinary rehabilitation  
9  
10 program. *Spine* 1995;20(7):801-6.  
11  
12 26. Toien K, Skogstad L, Ekeberg O, Myhren H, Schou Bredal I. Prevalence and predictors of  
13  
14 return to work in hospitalised trauma patients during the first year after discharge: a  
15  
16 prospective cohort study. *Injury* 2012;43(9):1606-13.  
17  
18 27. Clay FJ, Fitzharris M, Kerr E, McClure RJ, Watson WL. The association of social  
19  
20 functioning, social relationships and the receipt of compensation with time to return to  
21  
22 work following unintentional injuries to Victorian workers. *J Occup Rehabil*  
23  
24 2012;22(3):363-75.  
25  
26 28. Baker SP, O'Neill B. The injury severity score: an update. *The Journal of trauma*  
27  
28 1976;16(11):882-5.  
29  
30 29. Teasdale G, Jennett B. Assessment of coma and impaired consciousness. A practical scale.  
31  
32 *Lancet* 1974;2(7872):81-4.  
33  
34 30. Hepp U, Moergeli H, Buchi S, Wittmann L, Schnyder U. Coping with serious accidental  
35  
36 injury: a one-year follow-up study. *Psychother Psychosom* 2005;74(6):379-86.  
37  
38 31. Horowitz M, Wilner N, Alvarez W. Impact of Event Scale: a measure of subjective stress.  
39  
40 *Psychosom Med* 1979;41(3):209-18.  
41  
42 32. Spitzer RL, Williams JB, Kroenke K, Linzer M, deGruy FV, 3rd, Hahn SR, et al. Utility  
43  
44 of a new procedure for diagnosing mental disorders in primary care. The PRIME-MD  
45  
46 1000 study. *Jama* 1994;272(22):1749-56.  
47  
48 33. Sundin EC, Horowitz MJ. Horowitz's Impact of Event Scale evaluation of 20 years of use.  
49  
50  
51  
52  
53  
54  
55  
56  
57  
58  
59  
60

- 1  
2  
3  
4  
5  
6 34. Schnyder U, Wittmann L, Friedrich-Perez J, Hepp U, Moergeli H. Posttraumatic stress  
7 disorder following accidental injury: rule or exception in Switzerland? *Psychother*  
8 *Psychosom* 2008;77(2):111-8.  
9  
10  
11  
12 35. MacEachen E, Clarke J, Franche RL, Irvin E. Systematic review of the qualitative  
13 literature on return to work after injury. *Scand J Work Environ Health* 2006;32(4):257-  
14 69.  
15  
16  
17  
18 36. Post RB, van der Sluis CK, Ten Duis HJ. Return to work and quality of life in severely  
19 injured patients. *Disability and rehabilitation* 2006;28(22):1399-404.  
20  
21  
22  
23 37. Lazarus RS. Coping theory and research: past, present, and future. *Psychosom Med*  
24 1993;55(3):234-47.  
25  
26  
27  
28 38. Lazarus RS, Folkman S. *Stress, Appraisal and Coping*. New York: Springer, 1984.  
29  
30  
31  
32  
33  
34  
35  
36  
37  
38  
39  
40  
41  
42  
43  
44  
45  
46  
47  
48  
49  
50  
51  
52  
53  
54  
55  
56  
57  
58  
59  
60

1  
2  
3  
4  
5  
6 Figure captions  
7  
8  
9

10 Figure 1

11  
12 Sick-leave days of accident victims depending on appraisals of injury severity and coping abilities  
13  
14 (N=221, n=31 to 78 per group). Comparison of the group „lower appraisal of injury severity and  
15  
16 higher appraisal of coping abilities” with the three other groups: \*\*\*  $p \leq .001$ .  
17  
18  
19  
20  
21  
22  
23  
24  
25  
26  
27  
28  
29  
30  
31  
32  
33  
34  
35  
36  
37  
38  
39  
40  
41  
42  
43  
44  
45  
46  
47  
48  
49  
50  
51  
52  
53  
54  
55  
56  
57  
58  
59  
60

**Table 1| Socio-demographic characteristics of injured accident victims (N=221)**

| Variable                                    | No          | Percentage |
|---------------------------------------------|-------------|------------|
| Age (years)*                                | 40.0 (12.1) |            |
| Sex:                                        |             |            |
| Male                                        | 156         | 70.6       |
| Marital status:                             |             |            |
| Single                                      | 103         | 46.6       |
| Married                                     | 87          | 39.4       |
| Divorced/widowed                            | 31          | 14.0       |
| Living arrangements:                        |             |            |
| Alone                                       | 65          | 29.4       |
| With others (family, partner, friends)      | 156         | 70.6       |
| Maximum educational level:                  |             |            |
| No education                                | 2           | 0.9        |
| Obligatory school                           | 33          | 14.9       |
| Apprenticeship                              | 121         | 54.8       |
| College                                     | 13          | 5.9        |
| Technical or commercial college/University  | 52          | 23.5       |
| Employment status:                          |             |            |
| Paid work (full-time)                       | 159         | 71.9       |
| Paid work (part-time)                       | 37          | 16.7       |
| In education/ student (part-time paid work) | 21          | 9.5        |
| Unemployed at time of accident              | 4           | 1.8        |



1  
2  
3  
4  
5  
6  
7  
8  
9  
10  
11  
12  
13  
14  
15  
16  
17  
18  
19  
20  
21  
22  
23  
24  
25  
26  
27  
28  
29  
30  
31  
32  
33  
34  
35  
36  
37  
38  
39  
40  
41  
42  
43  
44  
45  
46  
47  
48  
49  
50  
51  
52  
53  
54  
55  
56  
57  
58  
59  
60

|                          |     |      |
|--------------------------|-----|------|
| Nationality              |     |      |
| Swiss                    | 163 | 73.8 |
| German/ Austrian         | 16  | 7.2  |
| South European countries | 24  | 10.9 |
| Balkanian countries      | 14  | 6.3  |
| Others                   | 4   | 1.8  |
| Language                 |     |      |
| Non German               | 31  | 14.5 |

---

\*Mean (standard deviation)

Table 2| Injury related characteristics of injured accident victims (N=221)

| Variable                                                                                | Mean | Standard<br>Deviation | Minimum | Maximum |
|-----------------------------------------------------------------------------------------|------|-----------------------|---------|---------|
| Injury Severity Score                                                                   | 12.1 | 10.1                  | 1       | 66      |
| Glasgow Coma Scale                                                                      | 14.8 | 0.7                   | 9       | 15      |
| Length of stay (days) at the<br>intensive care unit*                                    | 4.0  | 3.7                   | 1       | 19      |
| Length of stay (days) at the<br>University Hospital <sup>†‡</sup>                       | 15.8 | 16.9                  | 2       | 110     |
| Length of stay (days) at the<br>University Hospital and<br>Rehabilitation <sup>†‡</sup> | 23.1 | 28.8                  | 2       | 163     |
| Time off work at T2 <sup>‡</sup>                                                        | 95.7 | 58.1                  | 6       | 183     |

\*n=41 cases at the intensive care unit

<sup>†</sup> n=220

<sup>‡</sup>Subsumes the row above it

**Table 3| Bivariate correlations (Pearson correlation coefficients) between potential predictor variables (assessed 3-28 days after the accident) to each other and to the dependent variable time off work due to the unintentional injury (assessed 6 months after the accident) (N=221).**

| Variable | TOW      | ISS     | Sex*     | Age      | TRAFF    | WORK     | SPORT | IESIN   | AAS     |
|----------|----------|---------|----------|----------|----------|----------|-------|---------|---------|
| ISS      | 0.35***  |         |          |          |          |          |       |         |         |
| Sex      | -0.08    | -0.17*  |          |          |          |          |       |         |         |
| Age      | 0.09     | -0.19** | 0.09     |          |          |          |       |         |         |
| TRAFF    | -0.01    | 0.27*** | 0.01     | -0.22*** |          |          |       |         |         |
| WORK     | 0.23***  | 0.01    | -0.23*** | 0.16*    | -0.21**  |          |       |         |         |
| SPORT    | -0.28*** | -0.21** | 0.04     | -0.06    | -0.26*** | -0.23*** |       |         |         |
| IESIN    | 0.21**   | 0.23*** | 0.11     | 0.03     | 0.10     | -0.08    | -0.04 |         |         |
| AAS      | 0.40***  | 0.34*** | -0.06    | -0.02    | 0.12     | 0.13     | -0.13 | 0.27*** |         |
| ACA      | -0.29*** | -0.08   | -0.01    | -0.01    | -0.01    | -0.09    | 0.06  | -0.15*  | -0.19** |

TOW=time off work (days) due to the unintentional injury; ISS=Injury Severity Score; TRAFF=traffic accident; SPORT=sports or leisure accident; WORK=workplace accident; IESIN=Impact of Event Scale–intrusion subscale; AAS=appraisal of accident severity; ACA=appraisal of coping abilities.

\*Sex: 1=male, 2=female

Return to work 32

\* $p \leq 0.05$ , \*\* $p \leq 0.01$ , \*\*\* $p \leq 0.001$

For peer review only

**Table 4| Prediction of time off work over 6 months after the accident**

| Predictor variable             | Beta | 95%-CI for Beta |       | p     |
|--------------------------------|------|-----------------|-------|-------|
| Injury Severity Score          | .25  | 0.12            | 0.37  | <.001 |
| Female gender                  | -.01 | -0.13           | 0.11  | .893  |
| Age                            | .09  | -0.03           | 0.21  | .140  |
| Type of accident:              |      |                 |       |       |
| Traffic                        | -.12 | -0.24           | 0.01  | .062  |
| Workplace                      | .10  | -0.02           | 0.23  | .112  |
| Sports/leisure                 | -.18 | -0.31           | -0.06 | .003  |
| IES intrusion subscale         | .07  | -0.05           | 0.19  | .261  |
| Appraisal of accident severity | .24  | 0.12            | 0.36  | <.001 |
| Appraisal of coping abilities  | -.19 | -0.31           | -0.08 | .001  |

Multiple Regression: N=221; R=0.58; R<sup>2</sup>=0.34; F=11.93, df=9, 211; P<0.001.

Figure 1

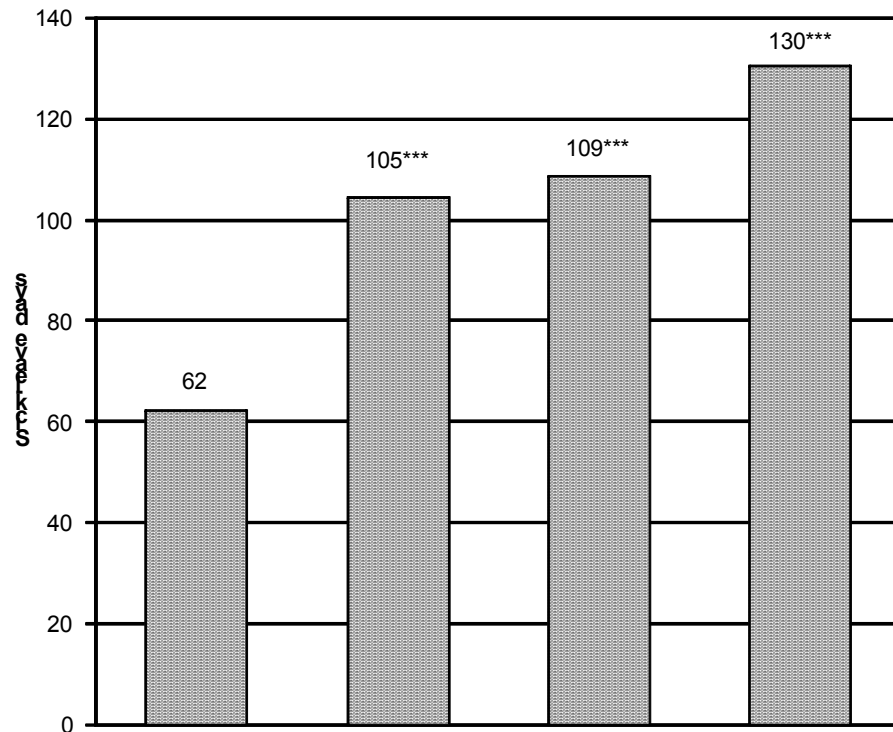

|                                               |        |        |       |        |
|-----------------------------------------------|--------|--------|-------|--------|
| <b>Initial appraisal of accident severity</b> | Lower  | Higher | Lower | Higher |
| <b>Initial appraisal of coping abilities</b>  | Higher | Higher | Lower | Lower  |

only

1  
2  
3  
4  
5  
6  
7  
8  
9  
10  
11  
12  
13  
14  
15  
16  
17  
18  
19  
20  
21  
22  
23  
24  
25  
26  
27  
28  
29  
30  
31  
32  
33  
34  
35  
36  
37  
38  
39  
40  
41  
42  
43  
44  
45  
46  
47  
48  
49  
50  
51  
52  
53  
54  
55  
56  
57  
58  
59  
60

1  
2  
3  
4  
5  
6  
7  
8 **Return to work following unintentional injury: a prospective follow-up study**  
9

10  
11  
12  
13  
14 Urs Hepp, Ulrich Schnyder, Sofia Hepp-Beg, Josefina Friedrich-Perez, Niklaus Stulz,  
15 Hanspeter Moergeli  
16  
17  
18  
19

20  
21  
22 Outpatient Department, Psychiatric Services Aargau (Teaching Hospital of the University of  
23 Zurich), CH-5201 Brugg, Switzerland Urs Hepp head of department  
24 Department of Psychiatry and Psychotherapy, University Hospital Zurich, CH-8091 Zurich,  
25 Switzerland Ulrich Schnyder head of department  
26 Private Practice, CH-8032 Zurich, Switzerland Sofia Hepp-Beg private practitioner  
27 Hospital Männedorf AG, CH-8708 Männedorf, Switzerland Josefina Friedrich-Perez senior  
28 physician  
29 Outpatient Department, Psychiatric Services Aargau (Teaching Hospital of the University of  
30 Zurich), CH-5201 Baden, Switzerland Niklaus Stulz research associate  
31 Department of Psychiatry and Psychotherapy, University Hospital Zurich, CH-8091 Zurich,  
32 Switzerland Hanspeter Moergeli senior researcher  
33  
34  
35  
36  
37  
38  
39  
40  
41  
42  
43

44 Correspondence to: U Hepp [urs.hepp@pdag.ch](mailto:urs.hepp@pdag.ch)  
45  
46  
47  
48

49 Word count: 4033  
50  
51  
52  
53  
54  
55  
56  
57  
58  
59  
60

## Abstract

### Objective

The aim of this study was to predict ~~return to~~time off work following unintentional injuries due to accidents leading to hospital admission.

### Design

Prospective 6 months follow-up study.

### Setting

Department of trauma surgery of a university hospital.

### Participants

Consecutively recruited victims of unintentional injuries (n=221) hospitalised for a minimum of 32 hours including two consecutive nights. All participants were aged 18-65 years and able to participate in an assessment within 30 days of the accident.

### Main outcome measures

Interview-assessed number of days off work during the 6 months immediately following the accident.

### Results

The patients' subjective appraisals of a) accident severity and b) their ability to cope with the resulting injury and its job-related consequences predicted time off work following the accident beyond the impact of the objective severity of their injury and the type of accident involved.

### Conclusions

Patients' subjective appraisals of the accident severity and of their ability to cope with its consequences are highly relevant for return to work after accidents. Extending findings from



1  
2  
3  
4  
5  
6  
7  
8  
9  
10  
11  
12  
13  
14  
15  
16  
17  
18  
19  
20  
21  
22  
23  
24  
25  
26  
27  
28  
29  
30  
31  
32  
33  
34  
35  
36  
37  
38  
39  
40  
41  
42  
43  
44  
45  
46  
47  
48  
49  
50  
51  
52  
53  
54  
55  
56  
57  
58  
59  
60

previous studies in severely injured and otherwise pre-selected accident victims, this seems to apply to the whole spectrum of patients hospitalised with unintentional injuries.

For peer review only

## Article summary

### Strengths and limitations of the study

- The application of very few exclusion criteria may have strengthened the study's external validity (generalisability), but at the same time may have limited its internal validity (i.e., factors other than the unintentional, accident-related injury might have influenced time off work).
- There were 68 (23.5%) drop-outs from baseline to follow-up, which however did not differ from the completers with respect to available patient and accident-related characteristics.
- Sick leave after unintentional injuries due to accidents was assessed in terms of time off work during the follow-up period, which provided a more accurate estimation of work-related consequences of accidents than the mere assessment whether the accident victim had returned to work or not at a particular point in time.
- However, the number of days off work was assessed by means of self-reports by the patients due to strict data privacy protection laws in Switzerland.

## Introduction

In the EU every year 6.5 million people are admitted to hospitals following unintentional injuries due to accidents.<sup>1</sup> This figure corresponds to more than 1% of the 500 million inhabitants in the EU. In addition to the direct costs of the treatment, unintentional injuries cause even higher indirect costs. Sick-leave following unintentional injuries is one of the most important contributors to these indirect costs.<sup>2,3</sup> Return to work is one of the most relevant measures of functional outcome of injuries,<sup>4</sup> and there is a growing body of literature on return to work after chronic injuries such as low-back pain.<sup>5</sup> However, there are still relatively few studies on return to work after unintentional injuries due to accidents.<sup>2,6-14</sup>

Generally, return to work is not only predicted by injury related or medical factors. Job related factors,<sup>2,12,15,16</sup> socioeconomic factors,<sup>2,7,9,12,17</sup> psychological distress,<sup>9,11,12</sup> causal attribution,<sup>18</sup> and compensation eligibility<sup>10,19</sup> become increasingly important factors for return to work the longer the medical condition lasts. How patients' expectations of recovery affect their health and vocational outcome is insufficiently researched.<sup>20,21</sup> Compared to those remaining on sick-leave, patients returning to work after injury had stronger internal health beliefs, i.e. they believed they had an influence on their own health and considered themselves powerful.<sup>7</sup> In several studies involving various medical conditions, patients' own expectations and predictions of their future work ability predicted return to work.<sup>22-24</sup> There are relatively few studies examining the role of the subjectively experienced accident severity and the subjectively experienced ability to cope with the unintentional injury regarding return to work.<sup>7,9,13,25</sup> The findings from these studies cannot be generalised as they are compromised by their highly selective samples: the studies were either restricted to severely injured patients without pre-existing mental disorders,<sup>7,8,13,26</sup> and/or they excluded foreign-language patients.<sup>7</sup>

1  
2  
3  
4  
5  
6  
7  
8  
9  
10  
11  
12  
13  
14  
15  
16  
17  
18  
19  
20  
21  
22  
23  
24  
25  
26  
27  
28  
29  
30  
31  
32  
33  
34  
35  
36  
37  
38  
39  
40  
41  
42  
43  
44  
45  
46  
47  
48  
49  
50  
51  
52  
53  
54  
55  
56  
57  
58  
59  
60

<sup>8 12 13 19 26 27</sup> In a previous study of severely injured accident victims we found that time off work was best predicted by the patients' own appraisals of accident severity and by the patients' own expectations regarding their ability to cope with the unintentional injury and its job-related consequences.<sup>13</sup> Whereas at the one-year follow-up, injury severity measured by the injury severity score (ISS)<sup>28</sup> and type of accident (traffic, workplace, sporting/leisure) were also predictive of time off work,<sup>8</sup> at the three-years follow-up only the self-reported appraisals of accident severity and the patients' ability to cope with the unintentional injury remained predictive of days absent from the workplace.<sup>13</sup> However, the sample in this previous study was highly selective. We included only severely injured (ISS $\geq$ 10), German-speaking patients and excluded patients who had been under treatment for any mental disorders and/or serious somatic illnesses at the time of the accident. By doing this we may have excluded patients at a higher risk for sick-leave and the results may therefore not be generalised to apply to all accident survivors.

The aim of this study was to predict ~~return to~~time off work (i.e., the number of sick-leave days) during the first 6 months following unintentional, accident-related injuries in an independent, larger and less selective sample of patients with any unintentional injury requiring hospital admission.

## Methods

### Sample

Participants were recruited from the Department of Trauma Surgery at the Zurich University Hospital. All the patients qualifying for the study had sustained unintentional injuries that required hospitalisation for a minimum of 32 hours including two consecutive nights (the latter guaranteed exclusion of patients who were treated in the emergency room overnight but who were not really hospitalised on a ward of the Department of Trauma Surgery). Further inclusion criteria were: age between 18 to 65 years; ability to participate in an extensive assessment within 30 days of the accident; and sufficient proficiency in one of the study languages (German, Italian, Spanish, Portuguese, Serbo-Croatian, Turkish, or Albanian) to participate in the interview and to complete the self-report questionnaires. Non-German speaking participants were assessed using interpreters and professionally translated psychometric instruments. Exclusion criteria were: a Glasgow Coma Scale score (GCS)<sup>29</sup> below 9; unconsciousness for more than 15 minutes after the accident; pathological findings in the cranial CT; attempted suicide.

In contrast to our previous study,<sup>8 13</sup> neither serious somatic illness, nor being in treatment for a mental disorder prior to the accident was an exclusion criterion in the present study.<sup>30</sup> Note that the sample of the previous study<sup>8 13</sup> and the sample of the present study on time off work were completely independent from each other (recruitment of the second sample started 18 months after the end of recruitment for the first sample). With regard to the possibility of generalising the present study's findings, we also retained patients for the present study who showed marked clinical signs or symptoms of mental disorders that were obviously unrelated to the unintentional injury.

1  
2  
3  
4  
5  
6  
7  
8 Patients were recruited over a period of 12 months. During this time period 787 patients aged  
9  
10 between 18 and 65 years were admitted with unintentional injuries. Of these patients 253 did  
11  
12 not meet the inclusion criteria due to early discharge (104; 41.1%), poor clinical condition  
13  
14 (74; 29.2%), GCS score below 9 (46; 18.2%), insufficient proficiency in one of the study  
15  
16 languages (21; 8.3%) or other reasons (29; 11.5%) (multiple reasons possible). As a result,  
17  
18 534 patients fulfilled all criteria and were eligible for the study. Due to a restricted  
19  
20 interviewing capacity, not all the eligible patients could be assessed. The following procedure  
21  
22 was applied to ensure the recruitment of a representative sample and to control for potential  
23  
24 bias attributable to the time of admission: on day 1, every other consecutive patient (i.e.  
25  
26 patient 1, 3, 5, etc.) was interviewed. On day 2 the order of the list of admissions was reversed  
27  
28 so that the last patient admitted was interviewed first, the third last patient was interviewed  
29  
30 second and so forth. On day 3, the order was reversed again, etc. The 148 patients who could  
31  
32 not be contacted due to our limited interviewing capacity did not differ from the participating  
33  
34 patients with regard to age (mean difference=-0.40 years; 95%-CI=-2.93 to 2.12;  $t=-0.31$ ;  
35  
36  $df=481$ ;  $P=0.754$ ) and gender (Pearson's  $\chi^2=0.77$ ,  $df=1$ ,  $P=0.375$ ). Of the 386 patients who  
37  
38 were contacted, 335 gave their written consent to participate. The 51 (13.2%) who declined  
39  
40 participation did not differ significantly from the participating patients with regard to age  
41  
42 (mean difference=3.75 years; 95%-CI=-0.12 to 7.61;  $t=-1.91$ ;  $df=384$ ;  $P=0.057$ ) and gender  
43  
44 (Pearson's  $\chi^2=0.07$ ;  $df=1$ ;  $P=0.792$ ).  
45  
46  
47  
48  
49  
50  
51

52 After the exclusion of a small number of victims of physical violence ( $n=12$ ), the sample  
53  
54 consisted of 323 patients who all attended the interview at T1. On average the T1 interview  
55  
56 was performed 5 days after the referral to the hospital (SD 4.2 days; range: 2 to 28 days).  
57  
58  
59  
60

1  
2  
3  
4  
5  
6 patients had no regular work and were excluded from further analyses regarding time off  
7  
8 work. However, four patients who were receiving unemployment compensation at the time of  
9  
10 the accident were retained for further analyses. For these patients accident-related time off  
11  
12 work was traceable since they needed a doctor's certificate to continue to be eligible for  
13  
14 unemployment compensation. In all, valid data regarding time off work were obtainable from  
15  
16 289 patients.  
17  
18  
19  
20

21 On average the follow-up interview (T2) took place 188 (SD 16.2; range 155 to 257) days  
22  
23 after the unintentional injury. 68 (23.5%) dropped out during the follow-up period; these 68  
24  
25 drop-outs did not differ significantly from the final sample with regard to age (mean  
26  
27 difference=-2.78 years; 95%-CI=-6.13 to 0.57;  $t=-1.63$ ;  $df=287$ ;  $P=0.104$ ), gender (Pearson's  
28  
29  $\chi^2=3.3$ ;  $df=1$ ;  $P=0.069$ ), type of accident (Pearson's  $\chi^2=6.5$ ;  $df=1$ ;  $P=0.088$ ), clinician-rated  
30  
31 Injury Severity Score<sup>28</sup> (mean difference=-0.77; 95%-CI=-3.54 to 1.99;  $t=-0.55$ ;  $df=287$ ;  
32  
33  $P=0.582$ ), and patient-rated subjective accident severity ( $t=1.19$ ;  $df=287$ ;  $P=0.237$ ), appraisal  
34  
35 of coping abilities (mean difference=-0.16; 95%-CI=-0.37 to 0.04;  $t=-1.58$ ;  $df=283$ ;  $P=0.115$ ),  
36  
37 and intrusions as measured by the Impact of Event Scale<sup>31</sup> (mean difference=0.87; 95%-CI=-  
38  
39 1.14 to 2.28;  $t=0.86$ ;  $df=276$ ;  $P=0.393$ ). The final sample consisted of 221 patients.  
40  
41  
42  
43  
44

#### 45 Measures

46  
47 The Injury Severity Score (ISS)<sup>28</sup> and the Glasgow Coma Scale (GCS)<sup>29</sup> were routinely  
48  
49 assessed by the surgeons immediately after admission to the emergency room. The ISS  
50  
51 permits an evaluation of the severity of injuries by a trauma surgeon: Each part or area of the  
52  
53 body affected is given a score (1=minimum to 6=fatal injury). If the score is 6 in one area, the  
54  
55 ISS is assigned a sum score of 75. Otherwise, the scores for the three most severely injured  
56  
57  
58  
59  
60

1  
2  
3  
4  
5  
6 areas of the body are squared and then summed, producing a maximum score of 75. Patients  
7  
8 with a score of 10 or more are generally considered severely injured. The GCS is an observer-  
9  
10 rated scale for the clinical appraisal of the gravity of coma after injury to the skull and brain.  
11  
12 Patients with severe traumatic brain injuries generally have a score under 9.  
13

14  
15  
16 The semi-structured interview at T1 covered socio-demographic data, a detailed work record  
17  
18 and information about the accident. Existing pre-accident psychiatric disorders were assessed  
19  
20 using the Primary Care Evaluation of Mental Disorders.<sup>32</sup> The patients rated their appraisal of  
21  
22 the injury severity on a Likert scale ranging from “1=very slight” to “5=very severe”. They  
23  
24 also rated their ability to cope with the unintentional injury and its job-related consequences  
25  
26 on a Likert scale ranging from “1=very poor” to “5=very good”.<sup>8 13</sup> Posttraumatic  
27  
28 psychological symptoms were assessed by the Impact of Event Scale (IES),<sup>31</sup> a 15 item self-  
29  
30 rating questionnaire comprising two subscales (intrusion and avoidance) with high reliability  
31  
32 and validity.<sup>33</sup> Time off work, assessed at 6 months (T2) post-accident, was defined as the  
33  
34 patient-reported number of sick-leave days attributable to the unintentional injury and its  
35  
36 consequences including time of hospitalisation. To record their sick-leave days the patients  
37  
38 used a specified journal they received at T1. A week off work was set to equal seven days of  
39  
40 leave. Where subjects ~~who had previously been full-time employees~~ returned to work on a  
41  
42 part-time basis, the days on which they worked less were added to the ~~total~~ days of leave on a  
43  
44 pro rata basis.<sup>13</sup> The interviews were performed by two medical doctors (SHB and JFP). Each  
45  
46 patient was interviewed by the same interviewer at T1 and T2. Detailed information on the  
47  
48 study design and the interrater reliability is described in an earlier publication on the incidence  
49  
50 of PTSD in that sample.<sup>34</sup>  
51  
52  
53  
54  
55  
56  
57  
58  
59  
60



### Statistical analysis

Hierarchical linear multiple regression analyses were performed to predict the number of sick-leave days. They allowed for highlighting the relevance of patient's appraisal among the selected potential predictor variables. To enable us to enter the type of accident (road traffic, workplace, household, or leisure-time accidents) as a predictor into the multiple regression analysis, this categorical variable was converted into a set of three new variables so that a deviation contrast resulted. In this way the effect of each accident category was compared to the mean effect of all accident categories. Since there was one new variable for each degree of freedom, one accident category (household) had to be omitted in the regression analysis. In the final regression model including all potential predictors multi-collinearity was low (tolerance >0.75) and the distribution of regression standardised residuals was normal (Kolmogorov-Smirnov  $Z=0.63$ ,  $P=0.827$ ). Group comparisons of dimensional variables were performed with t-tests.

### Ethical approval

Ethical approval was granted by the Ethics Committee of the Canton of Zurich. Written informed consent was obtained from all participants.

## Results

The socio-demographic characteristics are presented in table 1. 35 (15.8%) of the 221 patients suffered from one or multiple pre-existing mental disorders immediately prior to the accident, and 31 patients (14.0%) did not speak German. Characteristics related to the unintentional injury of the 221 patients are found in table 2. The types of accident were as follows: 72 (32.6%) traffic accidents, 66 (29.9%) workplace accidents, 6 (2.7%) household accidents, and 77 (34.8%) sports/leisure activity-related accidents. The mean ISS differed significantly between the types of accident (traffic: M 16.0, SD 12.4; workplace or household: M 11.8, SD 8.2; sporting/leisure activity: M 8.7, SD 7.7; ANOVA:  $F=10.7$ ;  $df=2, 218$ ;  $P<0.001$ ).

According to the surgeons' files, 44 (19.9%) patients sustained a mild or moderate traumatic brain injury (MTBI). 41 (18.6%) patients were first referred to the intensive care unit (ICU), with a mean duration of ICU stay of 4.0 days (SD 3.7; range 1-19). The mean length of stay at the acute hospital including the ICU was 15.8 days (SD 16.9; range 2-110). 46 patients had a further stay in a rehabilitation hospital, with a mean length of stay of 35.0 days (SD 25.0; range 3-141). The mean number of sick-leave days was 95.7 (SD 58.1; range 6-183). Patients suffering from pre-existing mental disorders did not differ significantly from the rest of the sample with regard to the number of sick-leave days (mean difference=2.7 days; 95%-CI=-18.4 to 23.8;  $t=0.25$ ;  $df=219$ ;  $P=0.801$ ).

Bivariate correlations of all variables included in the regression analyses are presented in table 3. The objective injury severity (ISS) and the patients' subjective appraisals of the accident severity were positively correlated. Subjective appraisals of the accident severity (but not the objective injury severity scores) were negatively related with self-rated coping abilities.

1  
2  
3  
4  
5  
6 Time off work was significantly correlated with the injury severity (ISS), IES intrusion scores,  
7  
8 and the patients' own appraisals of both their injury severity and their coping abilities. Finally,  
9  
10 time off work was longer after workplace related accidents and shorter after sports/leisure  
11  
12 accidents.

13  
14  
15  
16  
17 In a simultaneous regression analysis the variables injury severity (ISS), sex, age, type of  
18  
19 accident (road traffic, workplace, or leisure-time accidents), and IES intrusion were entered as  
20  
21 potential predictors of time off work. Combined, these predictors explained 24.3% of the  
22  
23 variance of time off work ( $F=9.75$ ;  $df=7, 213$ ;  $P<0.001$ ). When in a series of hierarchical  
24  
25 regressions each of these predictors was examined when added last to this first set, ISS (8.3%,  
26  
27  $F=23.38$ ;  $df=1, 213$ ;  $P<0.001$ ), type of accident (7.6%;  $F$  change= $7.14$ ;  $df=3, 213$ ;  $P<0.001$ ),  
28  
29 and IES intrusion added unique variance (2.0%;  $F=5.63$ ;  $df=1, 213$ ;  $P=0.019$ ). These five  
30  
31 variables were then treated as the first set added in hierarchical regressions focusing on two  
32  
33 additional predictors, patients' appraisals of accident severity and of their coping abilities.  
34  
35 These two variables were entered in the second step accounting for an additional 9.4% of the  
36  
37 variance of the time off work 6 months post accident ( $F$  change= $15.04$ ;  $df=2, 211$ ;  $P<0.001$ ).  
38  
39 Self-reported appraisal of accident severity added 6.0% ( $F$  change= $18.14$ ;  $df=1, 212$ ,  
40  
41  $P<0.001$ ), and self reported appraisal of their coping abilities added 4.7% ( $F$  change= $14.17$ ;  
42  
43  $df=1, 212$ ;  $P<0.001$ ). Finally, each of the seven predictors in table 4 was evaluated for unique  
44  
45 variance contributed with the other six predictors already in the model. The severity of the  
46  
47 injury (ISS), type of accident, and the two appraisals variables remained significant, whereas  
48  
49 age, gender, and IES intrusion did not contribute significantly to the prediction of time off  
50  
51 work.  
52  
53  
54  
55  
56  
57  
58  
59  
60

1  
2  
3  
4  
5  
6 In order to visualize the effects of appraisals on sick-leave days, the sample was divided into  
7  
8 four groups based on median-splits in the two variables appraisal of accident severity and  
9  
10 appraisal of coping abilities (fig. 1). The median was 4 Likert points in the subjective accident  
11  
12 severity scale, and 5 Likert points in the self-rated coping abilities scale. Patients with values  
13  
14 equal or higher than the median were grouped as 'higher' in the respective characteristic,  
15  
16 patients with values lower than the median were grouped as 'lower' concerning subjective  
17  
18 injury severity or self-rated coping abilities, respectively. Regarding the two groups of  
19  
20 particular interest, namely patients who assessed the accident severity as higher and their  
21  
22 coping abilities as lower, compared with patients who estimated the accident severity as lower  
23  
24 and their coping abilities as higher, there were twice as many sick-leave days for the former  
25  
26 group (mean difference=-68.1 days; 95%-CI=-85.7 to -50.5;  $t=-7.67$ ;  $df=124$ ;  $P<0.001$ ).  
27  
28  
29  
30  
31  
32  
33  
34  
35  
36  
37  
38  
39  
40  
41  
42  
43  
44  
45  
46  
47  
48  
49  
50  
51  
52  
53  
54  
55  
56  
57  
58  
59  
60

## Discussion

How patients perceive the severity of their accident and their ability to cope with the resulting injury and its job-related consequences are crucial predictors for return to work after unintentional injuries which lead to hospital admission. The current study demonstrated that the patients' own appraisals of the severity of their accident and of their coping resources predict time off work after accidents leading to hospital admission beyond the impact of the objective injury severity (ISS).

Some limitations of this study have to be addressed. To enable the findings from this current study to be better generalised to all hospitalised accident victims, we applied very few exclusion criteria. For example, we did not exclude patients with pre-existing somatic and psychiatric morbidity or non-ICU patients. While this may have strengthened the external validity of our findings, factors other than the unintentional injury might have influenced outcomes. By including patients with pre-existing somatic and psychiatric morbidity we possibly included patients who were at higher risk for sick-leave following unintentional injury. However, patients suffering from pre-existing mental disorders did not differ from other patients with regard to the number of sick-leave days. The inclusion criterion of being hospitalised for at least 32 hours including two consecutive nights may limit the generalisability of the study's findings, but guaranteed that all patients in the sample were really hospitalised and not only received an overnight treatment in the emergency room (which formally is an instance of hospitalisation but in fact is an outpatient treatment).

Another factor that may affect return to work is compensation eligibility.<sup>10 19</sup> In Switzerland all inhabitants receive compensation in the case of work incapacity or disability independent of the type of accident. For employees there is a mandatory accident insurance that covers

1  
2  
3  
4  
5  
6 both work- and non-work-related injuries due to accidents. Thus, it is unlikely that different  
7  
8 compensation rules related to different types of accidents biased our results. Nevertheless, the  
9  
10 very generous compensation system in Switzerland may limit the generalisability of our  
11  
12 findings to other countries with other or less generous compensation systems. Furthermore,  
13  
14 there were 68 (23.5%) drop-outs from T1 to T2 in our study. It is unlikely that these drop-outs  
15  
16 affected the results substantially as they did not differ significantly from the final sample.  
17  
18 Finally, the number of days off work was assessed by means of self-report by the patients.  
19  
20 Strict data privacy protection laws in Switzerland prevent the use of health insurance  
21  
22 companies' data for the purpose of research projects. Such data would have been more  
23  
24 reliable.  
25  
26

27  
28  
29  
30 The relevance of psychosocial and subjective factors for a successful return to work after  
31  
32 accidents has been increasingly recognised in literature.<sup>7 11 20 26 27 35</sup> The total amount of  
33  
34 explained variance in the present study was moderate ( $R^2=.34$ ) but within the range of  
35  
36 comparable studies.<sup>8 9 12-14 26</sup> Nevertheless, this suggests that other factors than the ones we  
37  
38 examined are also important regarding return to work. Extending the findings from previous  
39  
40 studies among severely injured accident victims,<sup>7 8 13</sup> the current study confirmed the  
41  
42 predictive value of patients' subjective appraisals of the accident severity for the whole  
43  
44 spectrum of patients admitted to hospitals with unintentional injuries. In contrast to our  
45  
46 previous study in severely injured accident victims who were hospitalised at the ICU,<sup>8 13</sup> the  
47  
48 completely independent sample of the current study included all unintentional injuries leading  
49  
50 to hospital admission, with only 18.6% of the patients requiring ICU treatment. In an effort to  
51  
52 enable the findings from this current study to be better generalised, unlike in our previous  
53  
54 study with another sample,<sup>8 13</sup> we did not exclude foreign language patients and patients with  
55  
56  
57  
58  
59  
60

1  
2  
3  
4  
5  
6 pre-existing somatic illnesses and mental disorders. In some cases these particular patients  
7  
8 may be less well socially integrated or have greater difficulties dealing with the consequences  
9  
10 of unintentional injuries; both being risk factors for work disability. In our heterogeneous  
11  
12 sample including moderately injured and foreign language accident victims with pre-existing  
13  
14 somatic and psychiatric morbidity, the subjectively experienced accident severity predicted  
15  
16 time off work after the accidents to the same degree as the objective injury severity  
17  
18 (regression weights: Betas = .24 vs. .25). The role of the objective injury severity regarding  
19  
20 time off work after unintentional injuries is ambiguous. In keeping with some previous  
21  
22 studies,<sup>2 7 8</sup> we found the more severe injuries to be related to more days off work. However,  
23  
24 some other studies could not find that association.<sup>9 11 12 36</sup> These inconsistent findings might  
25  
26 be explained by the different ranges of injury severities and by the different follow-up  
27  
28 intervals used in different studies. The wider the range of injury severities in a study, the  
29  
30 higher the chance that the severity of the physical impairment predicts subsequent time off  
31  
32 work. The more time that has elapsed since the accident, the less impact the objective injury  
33  
34 severity is expected to have on time off work. The physical condition may play a more  
35  
36 important role immediately following the accident because hospitalisation and rehabilitation  
37  
38 directly contribute to the time off work, whereas in the longer term other factors might gain in  
39  
40 importance regarding sick-leave. In our previous study among severely injured accident  
41  
42 victims, the objective injury severity predicted time off work during the first year after the  
43  
44 accident but was no longer predictive for the number of days off work at the three year follow-  
45  
46 up.<sup>8 13</sup> In a longer term perspective, factors other than the objective physical impairment, e.g.  
47  
48 psychosocial or subjective factors, might gain in importance regarding return to work.  
49  
50  
51  
52  
53  
54  
55  
56  
57  
58  
59  
60

1  
2  
3  
4  
5  
6 Concerning subjective factors predicting return to work, the patients' appraisals of the ability  
7  
8 to cope with the unintentional injury and its job-related consequences turned out to be another  
9  
10 important predictor of sick-leave after hospital admissions due to unintentional, accident-  
11  
12 related injuries. The more coping resources patients perceived themselves to have at their  
13  
14 disposal immediately after the accident, the better his or her chances for vocational  
15  
16 rehabilitation actually were. The significance of subjectively perceived coping abilities for  
17  
18 return to work has already been found in earlier studies.<sup>8 12 13</sup> The predictive value of the  
19  
20 patients' appraisals of the accident severity and of the coping abilities regarding time off work  
21  
22 after unintentional injuries may be explained by Lazarus' theories on stress, appraisal and  
23  
24 coping.<sup>37 38</sup> Lazarus emphasized the significance of primary and secondary appraisal of a  
25  
26 stressful situation or event. In a primary appraisal the same situation can be judged as harmful,  
27  
28 as a threat or as a challenge by different individuals. In a secondary appraisal the individual  
29  
30 judges the ability to cope with the situation depending on his or her individual coping  
31  
32 strategies. If a stressful situation is appraised as controllable by action, problem-focused  
33  
34 coping will predominate. In a situation viewed as refractory to change, however, emotion-  
35  
36 focused coping is more likely to predominate. Among accident victims these two steps of  
37  
38 appraisals seem to be related. In our sample, the more threatening the patients judged their  
39  
40 accident to have been, the fewer resources they perceived themselves to have at their disposal  
41  
42 for coping with the unintentional injury and its job-related consequences. However, the  
43  
44 subjective appraisal of the coping abilities was not correlated with the objective injury  
45  
46 severity. This further emphasizes the importance of considering not only the patient's  
47  
48 objective injury severity but also their own appraisal of the accident severity and the coping  
49  
50 abilities when predicting the chances of return to work. Coping with stressful events is  
51  
52 increasingly viewed as a process rather than an inert (personality) style. If coping is open to  
53  
54  
55  
56  
57  
58  
59  
60



1  
2  
3  
4  
5  
6  
7  
8  
9  
10  
11  
12  
13  
14  
15  
16  
17  
18  
19  
20  
21  
22  
23  
24  
25  
26  
27  
28  
29  
30  
31  
32  
33  
34  
35  
36  
37  
38  
39  
40  
41  
42  
43  
44  
45  
46  
47  
48  
49  
50  
51  
52  
53  
54  
55  
56  
57  
58  
59  
60

change over time in accordance with the situational context,<sup>30 37</sup> this may be promising for preventive and therapeutic interventions.

For peer review only

## Conclusion

A patient's own appraisal of the severity of their accident and of their ability to cope with the unintentional injury and its job-related consequences, are highly relevant for return to work after accidents leading to hospital admission. Both subjective appraisals predict time off work beyond the impact of the objective injury severity in the whole spectrum of patients hospitalised due to unintentional injuries.

In Western countries the quality of surgical care of accident victims has reached a high standard. In patients hospitalised with unintentional injuries, even where acute surgical care is inevitable, from a less immediate standpoint and bearing in mind future rehabilitation, a patient's subjective assessment seems to gain in importance where their recovery is concerned. It appears that relevant prognostic information regarding return to work can be obtained by asking the patient two simple questions:

- 1.) How severe do you think your accident was?
- 2.) How well do you think you will be able to handle the consequences of the accident with regard to return to work?

Any comprehensive treatment following unintentional injuries should routinely be accompanied by a brief psychosocial assessment and should include information and practical advice.

**Copyright**

The Corresponding Author has the right to grant on behalf of all authors and does grant on behalf of all authors, an exclusive licence (or non exclusive for government employees) on a worldwide basis to the BMJ Publishing Group Ltd to permit this article (if accepted) to be published in BMJ editions and any other BMJ PGL products and sublicences such use and exploit all subsidiary rights, as set out in our licence.

**Competing interests**

This study was supported by the Swiss National Science Foundation (32-053736.98). The Swiss National Science Foundation is a government-funded national institution. No commercial sponsorship was involved in the design and conduct of the study. All authors declare that they have no financial relationships with any organisation that might have an interest in the submitted work in the previous three years, and that they have no other relationships or activities that could appear to have influenced the submitted work.

**Author contributions**

US and HM designed the study. HM, SHB and JFP were involved in the data collection. HM performed the statistical analyses. UH, HM, NS, US were involved in the interpretation of the data. NS, UH and HM drafted the manuscript. US reviewed the manuscript several times. All authors have read and approved the final version of the manuscript.

**Data sharing**

There is no additional data available.

## References

1. Bauer R, Steiner M. Injuries in the European Union. Statistics Summary 2005-2007. Vienna: KfV, Austrian Road Safety Board, 2009.
2. MacKenzie EJ, Morris JA, Jr., Jurkovich GJ, Yasui Y, Cushing BM, Burgess AR, et al. Return to work following injury: the role of economic, social, and job-related factors. *Am J Public Health* 1998;88(11):1630-7.
3. Leigh JP, Markowitz SB, Fahs M, Shin C, Landrigan PJ. Occupational injury and illness in the United States. Estimates of costs, morbidity, and mortality. *Arch Intern Med* 1997;157(14):1557-68.
4. Ebel BE, Mack C, Diehr P, Rivara FP. Lost working days, productivity, and restraint use among occupants of motor vehicles that crashed in the United States. *Inj Prev* 2004;10(5):314-9.
5. Loisel P, Anema JR, editors. *Handbook of Work Disability. Prevention and Management*. New York, NY: Springer, 2013.
6. MacKenzie EJ, Shapiro S, Smith RT, Siegel JH, Moody M, Pitt A. Factors influencing return to work following hospitalization for traumatic injury. *Am J Public Health* 1987;77(3):329-34.
7. Soberg HL, Finset A, Bautz-Holter E, Sandvik L, Roise O. Return to work after severe multiple injuries: a multidimensional approach on status 1 and 2 years postinjury. *The Journal of trauma* 2007;62(2):471-81.
8. Schnyder U, Moergeli H, Klaghofer R, Sensky T, Buchi S. Does patient cognition predict time off from work after life-threatening accidents? *Am J Psychiatry* 2003;160(11):2025-31.

- 1  
2  
3  
4  
5  
6 9. Michaels AJ, Michaels CE, Moon CH, Zimmerman MA, Peterson C, Rodriguez JL.  
7  
8 Psychosocial factors limit outcomes after trauma. *The Journal of trauma*  
9  
10 1998;44(4):644-8.  
11  
12 10. Zelle BA, Panzica M, Vogt MT, Sittaro NA, Krettek C, Pape HC. Influence of workers'  
13  
14 compensation eligibility upon functional recovery 10 to 28 years after polytrauma.  
15  
16 *American journal of surgery* 2005;190(1):30-6.  
17  
18 11. Davydow DS, Zatzick DF, Rivara FP, Jurkovich GJ, Wang J, Roy-Byrne PP, et al.  
19  
20 Predictors of posttraumatic stress disorder and return to usual major activity in  
21  
22 traumatically injured intensive care unit survivors. *General hospital psychiatry*  
23  
24 2009;31(5):428-35.  
25  
26 12. Lange C, Burgmer M, Braunheim M, Heuft G. Prospective analysis of factors associated  
27  
28 with work reentry in patients with accident-related injuries. *J Occup Rehabil*  
29  
30 2007;17(1):1-10.  
31  
32 13. Hepp U, Moergeli H, Buchi S, Bruchhaus-Steinert H, Sensky T, Schnyder U. The long-  
33  
34 term prediction of return to work following serious accidental injuries: a follow up  
35  
36 study. *BMC Psychiatry* 2011;11:53.  
37  
38 14. Lilley R, Davie G, Ameratunga S, Derrett S. Factors predicting work status 3 months after  
39  
40 injury: results from the Prospective Outcomes of Injury Study. *BMJ Open*  
41  
42 2012;2(2):e000400.  
43  
44 15. Hunter SJ, Shaha S, Flint D, Tracy DM. Predicting return to work. A long-term follow-up  
45  
46 study of railroad workers after low back injuries. *Spine* 1998;23(21):2319-28.  
47  
48 16. Brewin CR, Robson MJ, Shapiro DA. Social and psychological determinants of recovery  
49  
50 from industrial injuries. *Injury* 1983;14(5):451-5.  
51  
52  
53  
54  
55  
56  
57  
58  
59  
60

- 1  
2  
3  
4  
5  
6  
7  
8  
9  
10  
11  
12  
13  
14  
15  
16  
17  
18  
19  
20  
21  
22  
23  
24  
25  
26  
27  
28  
29  
30  
31  
32  
33  
34  
35  
36  
37  
38  
39  
40  
41  
42  
43  
44  
45  
46  
47  
48  
49  
50  
51  
52  
53  
54  
55  
56  
57  
58  
59  
60
17. Andersson AL, Bunketorp O, Allebeck P. High rates of psychosocial complications after road traffic injuries. *Injury* 1997;28(8):539-43.
18. Rusch MD, Dzwierzynski WW, Sanger JR, Pruitt NT, Siewert AD. Return to work outcomes after work-related hand trauma: the role of causal attributions. *The Journal of hand surgery* 2003;28(4):673-7.
19. Hou WH, Sheu CF, Liang HW, Hsieh CL, Lee Y, Chuang HY, et al. Trajectories and predictors of return to work after traumatic limb injury--a 2-year follow-up study. *Scand J Work Environ Health* 2012;38(5):456-66.
20. Mondloch MV, Cole DC, Frank JW. Does how you do depend on how you think you'll do? A systematic review of the evidence for a relation between patients' recovery expectations and health outcomes. *Cmaj* 2001;165(2):174-9.
21. Ozegovic D, Carroll LJ, Cassidy JD. What influences positive return to work expectation? Examining associated factors in a population-based cohort of whiplash-associated disorders. *Spine (Phila Pa 1976)* 2010;35(15):E708-13.
22. Hansen A, Edlund C, Henningson M. Factors relevant to a return to work: a multivariate approach. *Work* 2006;26(2):179-90.
23. Heijbel B, Josephson M, Jensen I, Stark S, Vingard E. Return to work expectation predicts work in chronic musculoskeletal and behavioral health disorders: prospective study with clinical implications. *J Occup Rehabil* 2006;16(2):173-84.
24. Lindell O, Johansson SE, Strender LE. Predictors of stable return-to-work in non-acute, non-specific spinal pain: low total prior sick-listing, high self prediction and young age. A two-year prospective cohort study. *BMC Fam Pract* 2010;11:53.

- 1  
2  
3  
4  
5  
6 25. Lanes TC, Gauron EF, Spratt KF, Wernimont TJ, Found EM, Weinstein JN. Long-term  
7  
8 follow-up of patients with chronic back pain treated in a multidisciplinary rehabilitation  
9  
10 program. *Spine* 1995;20(7):801-6.  
11  
12 26. Toien K, Skogstad L, Ekeberg O, Myhren H, Schou Bredal I. Prevalence and predictors of  
13  
14 return to work in hospitalised trauma patients during the first year after discharge: a  
15  
16 prospective cohort study. *Injury* 2012;43(9):1606-13.  
17  
18 27. Clay FJ, Fitzharris M, Kerr E, McClure RJ, Watson WL. The association of social  
19  
20 functioning, social relationships and the receipt of compensation with time to return to  
21  
22 work following unintentional injuries to Victorian workers. *J Occup Rehabil*  
23  
24 2012;22(3):363-75.  
25  
26 28. Baker SP, O'Neill B. The injury severity score: an update. *The Journal of trauma*  
27  
28 1976;16(11):882-5.  
29  
30 29. Teasdale G, Jennett B. Assessment of coma and impaired consciousness. A practical scale.  
31  
32 *Lancet* 1974;2(7872):81-4.  
33  
34 30. Hepp U, Moergeli H, Buchi S, Wittmann L, Schnyder U. Coping with serious accidental  
35  
36 injury: a one-year follow-up study. *Psychother Psychosom* 2005;74(6):379-86.  
37  
38 31. Horowitz M, Wilner N, Alvarez W. Impact of Event Scale: a measure of subjective stress.  
39  
40 *Psychosom Med* 1979;41(3):209-18.  
41  
42 32. Spitzer RL, Williams JB, Kroenke K, Linzer M, deGruy FV, 3rd, Hahn SR, et al. Utility  
43  
44 of a new procedure for diagnosing mental disorders in primary care. The PRIME-MD  
45  
46 1000 study. *Jama* 1994;272(22):1749-56.  
47  
48 33. Sundin EC, Horowitz MJ. Horowitz's Impact of Event Scale evaluation of 20 years of use.  
49  
50 *Psychosom Med* 2003;65(5):870-6.  
51  
52  
53  
54  
55  
56  
57  
58  
59  
60

- 1  
2  
3  
4  
5  
6 34. Schnyder U, Wittmann L, Friedrich-Perez J, Hepp U, Moergeli H. Posttraumatic stress  
7 disorder following accidental injury: rule or exception in Switzerland? *Psychother*  
8 *Psychosom* 2008;77(2):111-8.  
9  
10  
11  
12 35. MacEachen E, Clarke J, Franche RL, Irvin E. Systematic review of the qualitative  
13 literature on return to work after injury. *Scand J Work Environ Health* 2006;32(4):257-  
14 69.  
15  
16  
17  
18 36. Post RB, van der Sluis CK, Ten Duis HJ. Return to work and quality of life in severely  
19 injured patients. *Disability and rehabilitation* 2006;28(22):1399-404.  
20  
21  
22  
23 37. Lazarus RS. Coping theory and research: past, present, and future. *Psychosom Med*  
24 1993;55(3):234-47.  
25  
26  
27  
28 38. Lazarus RS, Folkman S. *Stress, Appraisal and Coping*. New York: Springer, 1984.  
29  
30  
31  
32  
33  
34  
35  
36  
37  
38  
39  
40  
41  
42  
43  
44  
45  
46  
47  
48  
49  
50  
51  
52  
53  
54  
55  
56  
57  
58  
59  
60



1  
2  
3  
4  
5  
6 Figure captions  
7  
8  
9

10 Figure 1

11  
12 Sick-leave days of accident victims depending on appraisals of injury severity and coping abilities

13  
14 (N=221, n=31 to 78 per group). Comparison of the group „lower appraisal of injury severity and

15  
16 higher appraisal of coping abilities” with the three other groups: \*\*\*  $p \leq .001$ .  
17  
18  
19  
20  
21  
22  
23  
24  
25  
26  
27  
28  
29  
30  
31  
32  
33  
34  
35  
36  
37  
38  
39  
40  
41  
42  
43  
44  
45  
46  
47  
48  
49  
50  
51  
52  
53  
54  
55  
56  
57  
58  
59  
60

**Table 1| Socio-demographic characteristics of injured accident victims (N=221)**

| Variable                                    | No          | Percentage |
|---------------------------------------------|-------------|------------|
| Age (years)*                                | 40.0 (12.1) |            |
| Sex:                                        |             |            |
| Male                                        | 156         | 70.6       |
| Marital status:                             |             |            |
| Single                                      | 103         | 46.6       |
| Married                                     | 87          | 39.4       |
| Divorced/widowed                            | 31          | 14.0       |
| Living arrangements:                        |             |            |
| Alone                                       | 65          | 29.4       |
| With others (family, partner, friends)      | 156         | 70.6       |
| Maximum educational level:                  |             |            |
| No education                                | 2           | 0.9        |
| Obligatory school                           | 33          | 14.9       |
| Apprenticeship                              | 121         | 54.8       |
| College                                     | 13          | 5.9        |
| Technical or commercial college/University  | 52          | 23.5       |
| Employment status:                          |             |            |
| Paid work (full-time)                       | 159         | 71.9       |
| Paid work (part-time)                       | 37          | 16.7       |
| In education/ student (part-time paid work) | 21          | 9.5        |
| Unemployed at time of accident              | 4           | 1.8        |

1  
2  
3  
4  
5  
6  
7  
8  
9  
10  
11  
12  
13  
14  
15  
16  
17  
18  
19  
20  
21  
22  
23  
24  
25  
26  
27  
28  
29  
30  
31  
32  
33  
34  
35  
36  
37  
38  
39  
40  
41  
42  
43  
44  
45  
46  
47  
48  
49  
50  
51  
52  
53  
54  
55  
56  
57  
58  
59  
60

|                          |     |      |
|--------------------------|-----|------|
| Nationality              |     |      |
| Swiss                    | 163 | 73.8 |
| German/ Austrian         | 16  | 7.2  |
| South European countries | 24  | 10.9 |
| Balkanian countries      | 14  | 6.3  |
| Others                   | 4   | 1.8  |
| Language                 |     |      |
| Non German               | 31  | 14.5 |

---

\*Mean (standard deviation)

Table 2| Injury related characteristics of injured accident victims (N=221)

| Variable                                                                                | Mean | Standard<br>Deviation | Minimum | Maximum |
|-----------------------------------------------------------------------------------------|------|-----------------------|---------|---------|
| Injury Severity Score                                                                   | 12.1 | 10.1                  | 1       | 66      |
| Glasgow Coma Scale                                                                      | 14.8 | 0.7                   | 9       | 15      |
| Length of stay (days) at the<br>intensive care unit*                                    | 4.0  | 3.7                   | 1       | 19      |
| Length of stay (days) at the<br>University Hospital <sup>†‡</sup>                       | 15.8 | 16.9                  | 2       | 110     |
| Length of stay (days) at the<br>University Hospital and<br>Rehabilitation <sup>†‡</sup> | 23.1 | 28.8                  | 2       | 163     |
| Time off work at T2 <sup>‡</sup>                                                        | 95.7 | 58.1                  | 6       | 183     |

\*n=41 cases at the intensive care unit

<sup>†</sup> n=220

<sup>‡</sup>Subsumes the row above it

**Table 3| Bivariate correlations (Pearson correlation coefficients) between potential predictor variables (assessed 3-28 days after the accident) to each other and to the dependent variable time off work due to the unintentional injury (assessed 6 months after the accident) (N=221).**

| Variable | TOW      | ISS     | Sex*     | Age      | TRAFF    | WORK     | SPORT | IESIN   | AAS     |
|----------|----------|---------|----------|----------|----------|----------|-------|---------|---------|
| ISS      | 0.35***  |         |          |          |          |          |       |         |         |
| Sex      | -0.08    | -0.17*  |          |          |          |          |       |         |         |
| Age      | 0.09     | -0.19** | 0.09     |          |          |          |       |         |         |
| TRAFF    | -0.01    | 0.27*** | 0.01     | -0.22*** |          |          |       |         |         |
| WORK     | 0.23***  | 0.01    | -0.23*** | 0.16*    | -0.21**  |          |       |         |         |
| SPORT    | -0.28*** | -0.21** | 0.04     | -0.06    | -0.26*** | -0.23*** |       |         |         |
| IESIN    | 0.21**   | 0.23*** | 0.11     | 0.03     | 0.10     | -0.08    | -0.04 |         |         |
| AAS      | 0.40***  | 0.34*** | -0.06    | -0.02    | 0.12     | 0.13     | -0.13 | 0.27*** |         |
| ACA      | -0.29*** | -0.08   | -0.01    | -0.01    | -0.01    | -0.09    | 0.06  | -0.15*  | -0.19** |

TOW=time off work (days) due to the unintentional injury; ISS=Injury Severity Score; TRAFF=traffic accident; SPORT=sports or leisure accident; WORK=workplace accident; IESIN=Impact of Event Scale–intrusion subscale; AAS=appraisal of accident severity; ACA=appraisal of coping abilities.

\*Sex: 1=male, 2=female

Return to work 32

\* $p \leq 0.05$ , \*\* $p \leq 0.01$ , \*\*\* $p \leq 0.001$

For peer review only

**Table 4| Prediction of time off work over 6 months after the accident**

| Predictor variable             | Beta | 95%-CI for Beta |       | p     |
|--------------------------------|------|-----------------|-------|-------|
| Injury Severity Score          | .25  | 0.12            | 0.37  | <.001 |
| Female gender                  | -.01 | -0.13           | 0.11  | .893  |
| Age                            | .09  | -0.03           | 0.21  | .140  |
| Type of accident:              |      |                 |       |       |
| Traffic                        | -.12 | -0.24           | 0.01  | .062  |
| Workplace                      | .10  | -0.02           | 0.23  | .112  |
| Sports/leisure                 | -.18 | -0.31           | -0.06 | .003  |
| IES intrusion subscale         | .07  | -0.05           | 0.19  | .261  |
| Appraisal of accident severity | .24  | 0.12            | 0.36  | <.001 |
| Appraisal of coping abilities  | -.19 | -0.31           | -0.08 | .001  |

Multiple Regression: N=221; R=0.58; R<sup>2</sup>=0.34; F=11.93, df=9, 211; P<0.001.

Figure 1

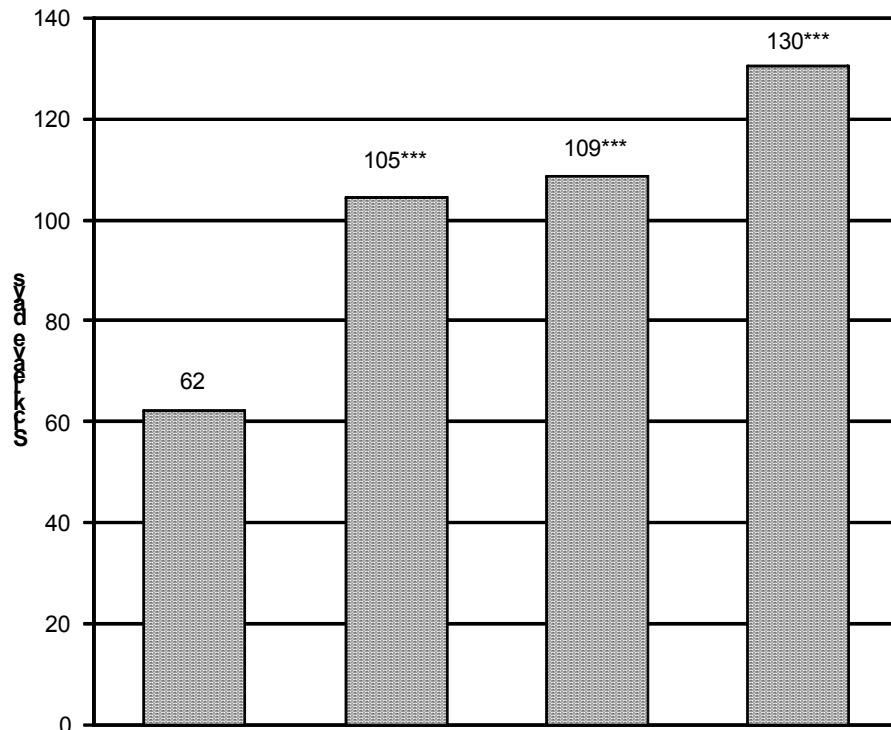

|                                               |        |        |       |        |
|-----------------------------------------------|--------|--------|-------|--------|
| <b>Initial appraisal of accident severity</b> | Lower  | Higher | Lower | Higher |
| <b>Initial appraisal of coping abilities</b>  | Higher | Higher | Lower | Lower  |

only

1  
2  
3  
4  
5  
6  
7  
8  
9  
10  
11  
12  
13  
14  
15  
16  
17  
18  
19  
20  
21  
22  
23  
24  
25  
26  
27  
28  
29  
30  
31  
32  
33  
34  
35  
36  
37  
38  
39  
40  
41  
42  
43  
44  
45  
46  
47  
48  
49  
50  
51  
52  
53  
54  
55  
56  
57  
58  
59  
60



STROBE Statement—Checklist of items that should be included in reports of *cohort studies*

page (5)

|                              | Item No | Recommendation                                                                                                                                                                                               |         |
|------------------------------|---------|--------------------------------------------------------------------------------------------------------------------------------------------------------------------------------------------------------------|---------|
| <b>Title and abstract</b>    | 1       | (a) Indicate the study's design with a commonly used term in the title or the abstract                                                                                                                       | 1       |
|                              |         | (b) Provide in the abstract an informative and balanced summary of what was done and what was found                                                                                                          | 2       |
| <b>Introduction</b>          |         |                                                                                                                                                                                                              |         |
| Background/rationale         | 2       | Explain the scientific background and rationale for the investigation being reported                                                                                                                         | 3-4     |
| Objectives                   | 3       | State specific objectives, including any prespecified hypotheses                                                                                                                                             | 4       |
| <b>Methods</b>               |         |                                                                                                                                                                                                              |         |
| Study design                 | 4       | Present key elements of study design early in the paper                                                                                                                                                      | 6       |
| Setting                      | 5       | Describe the setting, locations, and relevant dates, including periods of recruitment, exposure, follow-up, and data collection                                                                              | 5-6     |
| Participants                 | 6       | (a) Give the eligibility criteria, and the sources and methods of selection of participants. Describe methods of follow-up                                                                                   | 5-6     |
|                              |         | (b) For matched studies, give matching criteria and number of exposed and unexposed                                                                                                                          | —       |
| Variables                    | 7       | Clearly define all outcomes, exposures, predictors, potential confounders, and effect modifiers. Give diagnostic criteria, if applicable                                                                     | 7-8     |
| Data sources/<br>measurement | 8*      | For each variable of interest, give sources of data and details of methods of assessment (measurement). Describe comparability of assessment methods if there is more than one group                         | 7-8     |
| Bias                         | 9       | Describe any efforts to address potential sources of bias                                                                                                                                                    | 8       |
| Study size                   | 10      | Explain how the study size was arrived at                                                                                                                                                                    | 5-6     |
| Quantitative variables       | 11      | Explain how quantitative variables were handled in the analyses. If applicable, describe which groupings were chosen and why                                                                                 | 8-9     |
| Statistical methods          | 12      | (a) Describe all statistical methods, including those used to control for confounding                                                                                                                        | 8-9     |
|                              |         | (b) Describe any methods used to examine subgroups and interactions                                                                                                                                          | 8-9     |
|                              |         | (c) Explain how missing data were addressed                                                                                                                                                                  | 6-7     |
|                              |         | (d) If applicable, explain how loss to follow-up was addressed                                                                                                                                               | 6-7     |
|                              |         | (e) Describe any sensitivity analyses                                                                                                                                                                        | —       |
| <b>Results</b>               |         |                                                                                                                                                                                                              |         |
| Participants                 | 13*     | (a) Report numbers of individuals at each stage of study—eg numbers potentially eligible, examined for eligibility, confirmed eligible, included in the study, completing follow-up, and analysed            | 5-7     |
|                              |         | (b) Give reasons for non-participation at each stage                                                                                                                                                         | 5-7     |
|                              |         | (c) Consider use of a flow diagram                                                                                                                                                                           | —       |
| Descriptive data             | 14*     | (a) Give characteristics of study participants (eg demographic, clinical, social) and information on exposures and potential confounders                                                                     | Table 1 |
|                              |         | (b) Indicate number of participants with missing data for each variable of interest                                                                                                                          | 6-7     |
|                              |         | (c) Summarise follow-up time (eg, average and total amount)                                                                                                                                                  | 6       |
| Outcome data                 | 15*     | Report numbers of outcome events or summary measures over time                                                                                                                                               | 10      |
| Main results                 | 16      | (a) Give unadjusted estimates and, if applicable, confounder-adjusted estimates and their precision (eg, 95% confidence interval). Make clear which confounders were adjusted for and why they were included | 10-12   |
|                              |         | (b) Report category boundaries when continuous variables were categorized                                                                                                                                    | 12      |
|                              |         | (c) If relevant, consider translating estimates of relative risk into absolute risk for a meaningful time period                                                                                             | —       |

|    |                          |    |                                                                                                                                                                            |                  |
|----|--------------------------|----|----------------------------------------------------------------------------------------------------------------------------------------------------------------------------|------------------|
| 1  |                          |    |                                                                                                                                                                            |                  |
| 2  | Other analyses           | 17 | Report other analyses done—eg analyses of subgroups and interactions, and sensitivity analyses                                                                             | page(s)<br>10-11 |
| 3  |                          |    |                                                                                                                                                                            |                  |
| 4  | <b>Discussion</b>        |    |                                                                                                                                                                            |                  |
| 5  |                          |    |                                                                                                                                                                            |                  |
| 6  | Key results              | 18 | Summarise key results with reference to study objectives                                                                                                                   | 13/18            |
| 7  | Limitations              | 19 | Discuss limitations of the study, taking into account sources of potential bias or imprecision. Discuss both direction and magnitude of any potential bias                 | 13               |
| 8  |                          |    |                                                                                                                                                                            |                  |
| 9  | Interpretation           | 20 | Give a cautious overall interpretation of results considering objectives, limitations, multiplicity of analyses, results from similar studies, and other relevant evidence | 13-16/17         |
| 10 |                          |    |                                                                                                                                                                            |                  |
| 11 | Generalisability         | 21 | Discuss the generalisability (external validity) of the study results                                                                                                      | 14               |
| 12 |                          |    |                                                                                                                                                                            |                  |
| 13 | <b>Other information</b> |    |                                                                                                                                                                            |                  |
| 14 |                          |    |                                                                                                                                                                            |                  |
| 15 | Funding                  | 22 | Give the source of funding and the role of the funders for the present study and, if applicable, for the original study on which the present article is based              | 19               |
| 16 |                          |    |                                                                                                                                                                            |                  |
| 17 |                          |    |                                                                                                                                                                            |                  |

\*Give information separately for exposed and unexposed groups.

**Note:** An Explanation and Elaboration article discusses each checklist item and gives methodological background and published examples of transparent reporting. The STROBE checklist is best used in conjunction with this article (freely available on the Web sites of PLoS Medicine at <http://www.plosmedicine.org/>, Annals of Internal Medicine at <http://www.annals.org/>, and Epidemiology at <http://www.epidem.com/>). Information on the STROBE Initiative is available at <http://www.strobe-statement.org>.
